# Supplementary material
Source: PubMed Central journal article supplement (PMC3477297)
Supplement: NIHMS392562-supplement-Supp_Table_S1-S66_Figure_S1-S2.pdf [file NIHMS392562-supplement-Supp_Table_S1-S66_Figure_S1-S2.pdf]

## Supporting Information

# Extension of the CHARMM General Force Field to Sulfonyl-Containing Compounds and Its Utility in Biomolecular Simulations

Wenbo Yu, Xibing He, Kenno Vanommeslaeghe and Alexander D. MacKerell, Jr.\*

Department of Pharmaceutical Sciences, School of Pharmacy, University of Maryland, Baltimore,  
Maryland 21201

\* Corresponding author email: alex@outerbanks.umaryland.edu

| <b>Table of Contents:</b>                                                | <b>Page</b> |
|--------------------------------------------------------------------------|-------------|
| <b>N</b>                                                                 | <b>r</b>    |
| <b>u</b>                                                                 |             |
| <b>m</b>                                                                 |             |
| <b>b</b>                                                                 |             |
| <b>e</b>                                                                 |             |
| 1. Tables for Calculated QM and MM Properties of Model Compound MSAM     | S2-S3       |
| 2. Tables for Calculated QM and MM Properties of Model Compound BSAM     | S3-S6       |
| 3. Tables for Calculated QM and MM Properties of Model Compound MMSM     | S6-S8       |
| 4. Tables for Calculated QM and MM Properties of Model Compound MBSM     | S8-S11      |
| 5. Tables for Calculated QM and MM Properties of Model Compound EESM     | S12-S14     |
| 6. Tables for Calculated QM and MM Properties of Model Compound PMSM     | S14-S17     |
| 7. Tables for Calculated QM and MM Properties of Model Compound PBSM     | S18-S22     |
| 8. Scaled MP2/6-31G(d) and MM Level Vibrational Spectra of OBTZ          | S22-S23     |
| 8. Tables for Calculated QM and MM Properties of Model Compound DMSN     | S23-S25     |
| 9. Tables for Calculated QM and MM Properties of Model Compound EMSN     | S25-S27     |
| 10. Tables for Calculated QM and MM Properties of Model Compound MMST    | S27-S29     |
| 11. Tables for Calculated QM and MM Properties of Model Compound PMST    | S29-S32     |
| 12. Tables for Calculated QM and MM Properties of Model Compound MSNA    | S32-S33     |
| 13. Tables for Calculated QM and MM Properties of Model Compound ESNA    | S33-S35     |
| 14. Tables for Calculated QM and MM Properties of Model Compound PSNA    | S35-S38     |
| 15. Tables for Calculated QM and MM Properties of Model Compound MSMT    | S38-S39     |
| 16. Tables for Calculated QM and MM Properties of Model Compound PSMT    | S40-S42     |
| 17. Parameters Introduced to Enable Sulfonamide Based Peptide Simulation | S42-S43     |
| 18. MP2/cc-pVTZ//MP2/6-31G(d) level PESs VS MP2/6-31G(d) level PESs      | S44         |

**Table S1.** MM and HF/6-31G(d) level interaction energies (kcal/mol) and distances (Å) of MSAM – water complexes.

| Interaction | Orientation | $\Delta E$ (QM) | $\Delta E$ (MM) | Difference | r (QM) | r (MM) | Difference |
|-------------|-------------|-----------------|-----------------|------------|--------|--------|------------|
| O11...HOH   | 180         | -5.36           | -5.04           | 0.32       | 2.08   | 1.83   | -0.25      |
| O11...HOH   | 270         | -5.20           | -5.31           | -0.11      | 2.10   | 1.82   | -0.28      |
| N2...HOH    | 270         | -3.50           | -3.39           | 0.11       | 2.24   | 2.07   | -0.17      |
| N2H...OHH   | 0           | -6.18           | -5.95           | 0.23       | 2.02   | 1.85   | -0.17      |

**Table S2.** Gas phase dipole moment (Debye) of MSAM calculated at the MP2/6-31G(d) and MM level of theory.

| $\mu$ | QM      | MM      |
|-------|---------|---------|
| X     | -1.7042 | -2.2275 |
| Y     | 2.8347  | 2.7365  |
| Z     | 0.0297  | 0.0276  |
| Total | 3.3076  | 3.5286  |

**Table S3.** MM and MP2/6-31G(d) level equilibrium geometry of MSAM

| Coordinate      | QM    | MM    | Difference | Coordinate | QM    | MM    | Difference |
|-----------------|-------|-------|------------|------------|-------|-------|------------|
| Bond length (Å) |       |       |            | Angles (°) |       |       |            |
| S1-N2           | 1.684 | 1.621 | -0.062     | N2-S1-C3   | 101.9 | 101.5 | -0.4       |
| S1-O11          | 1.464 | 1.431 | -0.033     | O11-S1-N2  | 107.5 | 106.7 | -0.9       |
| S1-O12          | 1.464 | 1.431 | -0.033     | O12-S1-N2  | 107.5 | 106.7 | -0.9       |
| S1-C3           | 1.776 | 1.770 | -0.006     | O11-S1-C3  | 107.9 | 109.0 | 1.1        |
| N2-H21          | 1.019 | 1.015 | -0.004     | O12-S1-C3  | 107.9 | 109.0 | 1.1        |
| N2-H22          | 1.019 | 1.015 | -0.004     | O11-S1-O12 | 122.3 | 122.0 | -0.2       |
| C3-H31          | 1.091 | 1.108 | 0.016      | S1-N2-H21  | 109.5 | 108.7 | -0.8       |
| C3-H32          | 1.090 | 1.108 | 0.018      | S1-N2-H22  | 109.5 | 108.7 | -0.8       |
| C3-H33          | 1.090 | 1.108 | 0.018      | H21-N2-H22 | 110.9 | 111.2 | 0.3        |
| Dihedrals (°)   |       |       |            | S1-C3-H31  | 107.2 | 108.3 | 1.1        |
| N2-S1-C3-H31    | 180.0 | 180.0 | 0.0        | S1-C3-H32  | 108.9 | 108.8 | -0.1       |
|                 |       |       |            | S1-C3-H33  | 108.9 | 108.8 | -0.1       |
|                 |       |       |            | H31-C3-H32 | 110.4 | 110.2 | -0.2       |

|              |        |        |      |            |       |       |      |
|--------------|--------|--------|------|------------|-------|-------|------|
| H21-N2-S1-C3 | -119.1 | -119.4 | -0.3 | H31-C3-H33 | 110.4 | 110.2 | -0.2 |
|              |        |        |      | H32-C3-H33 | 110.9 | 110.5 | -0.4 |

**Table S4.** Scaled MP2/6-31G(d) and MM level vibrational spectra of MSAM.

| QM (scaled by a factor 0.943) |            |     |            |    |            | MM |        |            |     |            |    |            |    |
|-------------------------------|------------|-----|------------|----|------------|----|--------|------------|-----|------------|----|------------|----|
| Freq                          | Assignment | %   | Assignment | %  | Assignment | %  | Freq   | Assignment | %   | Assignment | %  | Assignment | %  |
| 152.4                         | tS1-N2     | 78  | iSO2       | 17 |            |    | 180.5  | tS1-N2     | 97  |            |    |            |    |
| 230.6                         | tC3-S1     | 96  |            |    |            |    | 239.6  | tC3-S1     | 100 |            |    |            |    |
| 280.9                         | cNSC       | 85  |            |    |            |    | 338.3  | cNSC       | 89  |            |    |            |    |
| 313.5                         | iSO2       | 68  | rSO2       | 15 |            |    | 344.1  | wSO2       | 79  |            |    |            |    |
| 381.2                         | rSO2       | 72  |            |    |            |    | 361.3  | iSO2       | 93  |            |    |            |    |
| 452.6                         | cSO2       | 45  | wSO2       | 42 |            |    | 384.5  | rSO2       | 92  |            |    |            |    |
| 477.1                         | wSO2       | 38  | cSO2       | 37 |            |    | 454.6  | cSO2       | 82  |            |    |            |    |
| 679.1                         | wNH2       | 50  | sS1-N2     | 44 |            |    | 643.1  | sC3-S1     | 39  | sS1-N2     | 28 |            |    |
| 720.8                         | sC3-S1     | 67  | wNH2       | 15 |            |    | 752.4  | sC3-S1     | 38  | sS1-N2     | 36 |            |    |
| 874.5                         | sS1-N2     | 35  | wNH2       | 31 |            |    | 892.6  | wNH2       | 77  |            |    |            |    |
| 968.8                         | rCH3'      | 81  |            |    |            |    | 949.4  | rCH3       | 81  |            |    |            |    |
| 982.8                         | rCH3       | 76  |            |    |            |    | 949.6  | rCH3'      | 90  |            |    |            |    |
| 1071.0                        | rNH2       | 81  |            |    |            |    | 1044.2 | rNH2       | 92  |            |    |            |    |
| 1112.2                        | sS1-O12    | 43  | sS1-O11    | 43 |            |    | 1119.6 | sS1-O12    | 41  | sS1-O11    | 41 |            |    |
| 1324.6                        | sS1-O11    | 43  | sS1-O12    | 43 |            |    | 1321.8 | sS1-O11    | 44  | sS1-O12    | 44 |            |    |
| 1347.4                        | dsCH3      | 98  |            |    |            |    | 1378.4 | dsCH3      | 93  |            |    |            |    |
| 1431.0                        | daCH3'     | 93  |            |    |            |    | 1441.6 | daCH3      | 94  |            |    |            |    |
| 1431.3                        | daCH3      | 93  |            |    |            |    | 1445.6 | daCH3'     | 93  |            |    |            |    |
| 1558.9                        | cNH2       | 101 |            |    |            |    | 1533.2 | cNH2       | 99  |            |    |            |    |
| 2960.1                        | sC3-H31    | 38  | sC3-H32    | 31 | sC3-H33    | 31 | 2843.9 | sC3-H31    | 33  | sC3-H33    | 33 | sC3-H32    | 33 |
| 3067.0                        | sC3-H31    | 62  | sC3-H32    | 19 | sC3-H33    | 19 | 2915.3 | sC3-H31    | 66  | sC3-H32    | 17 | sC3-H33    | 17 |
| 3076.1                        | sC3-H33    | 50  | sC3-H32    | 50 |            |    | 2916.6 | sC3-H32    | 50  | sC3-H33    | 50 |            |    |
| 3332.2                        | sN2-H22    | 50  | sN2-H21    | 50 |            |    | 3341.2 | sN2-H22    | 50  | sN2-H21    | 50 |            |    |
| 3443.6                        | sN2-H21    | 50  | sN2-H22    | 50 |            |    | 3420.5 | sN2-H22    | 50  | sN2-H21    | 50 |            |    |

Only vibrational modes with 15% or more contributions are shown here, but if no vibrational mode for a frequency higher than 15% contribution can be found, then the one with the highest contribution is shown. Notations for PED are: t6RNG and d6RNG are six member ring torsion and deformation; BFLY is bicyclic ring butterfly; s stands for bond stretching; ss and sa stand for group symmetric and asymmetric stretching; r for rocking; i for twisting; w for wagging; c for scissoring; t for torsions. Same notations are adopted in the following tables of vibrational spectra.

**Table S5.** MM and HF/6-31G(d) level interaction energies (kcal/mol) and distances (Å) of BSAM – water complexes.

| Interaction | Orientation | $\Delta E$ (QM) | $\Delta E$ (MM) | Difference | r (QM) | r (MM) | Difference |
|-------------|-------------|-----------------|-----------------|------------|--------|--------|------------|
| O11...HOH   | 180         | -5.32           | -5.18           | 0.14       | 2.08   | 1.83   | -0.25      |

|           |     |       |       |       |      |      |       |
|-----------|-----|-------|-------|-------|------|------|-------|
| O11...HOH | 270 | -5.42 | -5.56 | -0.14 | 2.08 | 1.81 | -0.27 |
| N2...HOH  | 270 | -2.37 | -2.62 | -0.25 | 2.42 | 2.08 | -0.34 |
| N2H...OHH | 0   | -5.96 | -5.99 | -0.03 | 2.03 | 1.85 | -0.18 |

**Table S6.** Gas phase dipole moment (Debye) of BSAM calculated at the MP2/6-31G(d) and MM level of theory.

| $\mu$ | QM      | MM      |
|-------|---------|---------|
| X     | -1.8213 | -1.8975 |
| Y     | -1.2688 | -1.4018 |
| Z     | 2.8815  | 2.9933  |
| Total | 3.6373  | 3.8112  |

**Table S7.** MM and MP2/6-31G(d) level equilibrium geometry of BSAM

| Coordinate      | QM    | MM    | Difference | Coordinate  | QM    | MM    | Difference |
|-----------------|-------|-------|------------|-------------|-------|-------|------------|
| Bond length (Å) |       |       |            | Angles (°)  |       |       |            |
| S1-N2           | 1.684 | 1.637 | -0.046     | N2-S1-CZ    | 103.2 | 104.0 | 0.9        |
| S1-O11          | 1.465 | 1.435 | -0.030     | O11-S1-N2   | 107.2 | 107.5 | 0.3        |
| S1-O12          | 1.465 | 1.435 | -0.030     | O12-S1-N2   | 106.8 | 107.5 | 0.7        |
| S1-CZ           | 1.775 | 1.781 | 0.007      | O11-S1-CZ   | 107.5 | 107.0 | -0.5       |
| N2-H21          | 1.019 | 1.015 | -0.004     | O12-S1-CZ   | 107.6 | 107.0 | -0.7       |
| N2-H22          | 1.019 | 1.015 | -0.004     | O11-S1-O12  | 122.7 | 122.5 | -0.2       |
| CZ-CE1          | 1.396 | 1.411 | 0.015      | S1-N2-H21   | 109.7 | 109.5 | -0.3       |
| CZ-CE2          | 1.396 | 1.411 | 0.015      | S1-N2-H22   | 109.4 | 109.5 | 0.1        |
| CE1-CD1         | 1.395 | 1.401 | 0.006      | H21-N2-H22  | 111.2 | 111.4 | 0.1        |
| CE2-CD2         | 1.395 | 1.401 | 0.005      | S1-CZ-CE1   | 119.1 | 120.7 | 1.6        |
| CG-CD1          | 1.397 | 1.400 | 0.003      | S1-CZ-CE2   | 119.1 | 120.7 | 1.6        |
| CG-CD2          | 1.397 | 1.400 | 0.003      | CE1-CZ-CE2  | 121.8 | 118.6 | -3.2       |
| CE1-HE1         | 1.086 | 1.081 | -0.006     | CZ-CE1-CD1  | 118.7 | 120.7 | 2.0        |
| CE2-HE2         | 1.086 | 1.081 | -0.006     | CZ-CE2-CD2  | 118.7 | 120.7 | 2.0        |
| CD1-HD1         | 1.087 | 1.081 | -0.006     | CG-CD1-CE1  | 120.3 | 119.9 | -0.3       |
| CD2-HD2         | 1.087 | 1.081 | -0.006     | CG-CD2-CE2  | 120.3 | 119.9 | -0.3       |
| CG-HG           | 1.087 | 1.081 | -0.006     | CD1-CG-CD2  | 120.2 | 120.1 | 0.0        |
| Dihedrals (°)   |       |       |            | CZ-CE1-HE1  | 120.0 | 119.8 | -0.2       |
| N2-S1-CZ-CE1    | -88.1 | -89.4 | -1.3       | CD1-CE1-HE1 | 120.0 | 119.8 | -0.2       |

|                |        |        |      |             |       |       |      |
|----------------|--------|--------|------|-------------|-------|-------|------|
| CZ-S1-N2-H21   | -116.1 | -118.8 | -2.7 | CD2-CE2-HE2 | 121.2 | 119.5 | -1.7 |
| S1-CZ-CE1-CD1  | 179.2  | 179.3  | 0.1  | CE1-CD1-HD1 | 121.3 | 119.5 | -1.8 |
| CZ-CE1-CD1-CG  | -0.1   | -0.2   | -0.1 | CE2-CD2-HD2 | 119.6 | 120.1 | 0.4  |
| CE1-CD1-CG-CD2 | 0.6    | 0.0    | -0.6 | CG-CD1-HD1  | 119.6 | 120.1 | 0.4  |
| S1-CZ-CE2-CD2  | -179.2 | -179.3 | -0.1 | CG-CD2-HD2  | 120.1 | 120.0 | -0.1 |
| CZ-CE2-CD2-CG  | 0.1    | 0.2    | 0.1  | CD1-CG-HG   | 120.1 | 120.0 | -0.1 |
| CE2-CD2-CG-CD1 | -0.6   | 0.0    | 0.6  | CD2-CG-HG   | 119.9 | 119.9 | 0.0  |

**Table S8.** Scaled MP2/6-31G(d) and MM level vibrational spectra of BSAM.

| QM (scaled by a factor 0.943) |            |     |            |     |            | MM |        |            |     |            |     |            |    |
|-------------------------------|------------|-----|------------|-----|------------|----|--------|------------|-----|------------|-----|------------|----|
| Freq                          | Assignment | %   | Assignment | %   | Assignment | %  | Freq   | Assignment | %   | Assignment | %   | Assignment | %  |
| 4.4                           | tCZ-S1     | 87  |            |     |            |    | 24.0   | tCZ-S1     | 98  |            |     |            |    |
| 86.7                          | tS1-N2     | 73  |            |     |            |    | 113.1  | tS1-N2     | 98  |            |     |            |    |
| 112.4                         | wCZH       | 64  | cNSC       | 20  | ta6RNG1    | 15 | 124.0  | wCZH       | 66  | cNSC       | 16  | ta6RNG1    | 15 |
| 182.9                         | dCZH       | 65  | rSO2       | 24  |            |    | 218.6  | dCZH       | 67  | rSO2       | 17  |            |    |
| 259.5                         | cNSC       | 51  | ta6RNG1    | 43  |            |    | 252.0  | cNSC       | 43  | sCZ-S1     | 19  | ta6RNG1    | 17 |
| 299.3                         | sCZ-S1     | 41  | da6RNG1    | 23  |            |    | 292.1  | wSO2       | 37  | ta6RNG1    | 19  | cNSC       | 17 |
|                               |            |     |            |     |            |    |        | sCZ-S1     | 15  |            |     |            |    |
| 341.9                         | iSO2       | 74  |            |     |            |    | 324.4  | iSO2       | 68  | dCZH       | 15  |            |    |
| 374.5                         | ta6RNG1a   | 116 |            |     |            |    | 375.0  | rSO2       | 68  | iSO2       | 19  |            |    |
| 411.4                         | cSO2       | 37  | ta6RNG1    | 37  |            |    | 384.7  | wSO2       | 30  | cSO2       | 24  | sCZ-S1     | 16 |
| 417.8                         | rSO2       | 67  | dCZH       | 17  |            |    | 413.5  | ta6RNG1a   | 118 |            |     |            |    |
| 485.0                         | tp6RNG1    | 63  | cSO2       | 20  |            |    | 482.5  | ta6RNG1    | 63  | wCZH       | 21  |            |    |
| 532.0                         | wSO2       | 24  | cSO2       | 20  | da6RNG1    | 17 | 498.1  | cSO2       | 68  |            |     |            |    |
| 547.3                         | wSO2       | 31  | tp6RNG1    | 29  | wCZH       | 17 | 652.3  | tp6RNG1    | 106 |            |     |            |    |
| 590.2                         | da6RNG1a   | 90  |            |     |            |    | 685.5  | da6RNG1a   | 82  |            |     |            |    |
| 662.2                         | wNH2       | 51  | sS1-N2     | 36  |            |    | 699.4  | sS1-N2     | 46  | da6RNG1    | 17  | wNH2       | 16 |
| 686.5                         | da6RNG1    | 44  | sCZ-S1     | 24  |            |    | 745.7  | da6RNG1    | 32  |            |     |            |    |
| 702.8                         | wCGH       | 31  | wCD1H      | 18  | wCD2H      | 18 | 752.2  | wCGH       | 22  |            |     |            |    |
| 794.8                         | wCE1H      | 31  | wCE2H      | 30  | wCD2H      | 20 | 850.0  | wCE1H      | 27  | wCE2H      | 27  | wCD2H      | 23 |
|                               | wCD1H      | 19  |            |     |            |    |        | wCD1H      | 23  |            |     |            |    |
| 842.5                         | wCE1H      | 37  | wCE2H      | 37  | wCGH       | 27 | 869.4  | wNH2       | 74  | sS1-N2     | 19  |            |    |
| 853.7                         | wCGH       | 47  | wCD1H      | 31  | wCD2H      | 27 | 916.1  | wCE1H      | 39  | wCE2H      | 39  | wCGH       | 28 |
| 857.1                         | sS1-N2     | 42  | wNH2       | 35  |            |    | 949.3  | dt6RNG1    | 68  |            |     |            |    |
| 860.2                         | wCD2H      | 37  | wCD1H      | 33  | wCE2H      | 25 | 975.9  | sCG-CD1    | 38  | sCD2-CG    | 38  |            |    |
|                               | wCE1H      | 22  | ta6RNG1a   | -17 |            |    |        |            |     |            |     |            |    |
| 958.5                         | dt6RNG1    | 65  |            |     |            |    | 991.2  | wCD2H      | 32  | wCD1H      | 32  | wCE1H      | 27 |
|                               |            |     |            |     |            |    |        | wCE2H      | 27  | ta6RNG1a   | -18 |            |    |
| 1003.0                        | sCG-CD1    | 29  | sCD2-CG    | 29  |            |    | 1006.1 | wCGH       | 53  | wCD2H      | 31  | wCD1H      | 31 |
|                               |            |     |            |     |            |    |        | tp6RNG1    | -18 |            |     |            |    |
| 1061.2                        | rNH2       | 18  | sCD1-CE1   | 17  |            |    | 1018.6 | sCD1-CE1   | 25  | sCE2-CD2   | 25  |            |    |

|        |          |     |          |    |          |    |        |          |    |          |    |          |    |
|--------|----------|-----|----------|----|----------|----|--------|----------|----|----------|----|----------|----|
| 1063.6 | sS1-O11  | 20  | sS1-O12  | 20 |          |    | 1050.5 | rNH2     | 92 |          |    |          |    |
| 1069.1 | rNH2     | 68  |          |    |          |    | 1068.9 | sCZ-S1   | 13 |          |    |          |    |
| 1121.4 | sS1-O11  | 27  | sS1-O12  | 25 | sCZ-S1   | 15 | 1118.1 | sS1-O11  | 31 | sS1-O12  | 31 |          |    |
| 1149.9 | dCGH     | 40  | dCD2H    | 21 | dCD1H    | 20 | 1198.7 | dCE2H    | 14 | dCE1H    | 14 |          |    |
| 1162.6 | dCD1H    | 21  | dCD2H    | 20 | dCE1H    | 18 | 1210.3 | dCGH     | 26 | dCD1H    | 19 | dCD2H    | 19 |
|        | dCE2H    | 18  |          |    |          |    |        |          |    |          |    |          |    |
| 1277.1 | dCE1H    | 29  | dCE2H    | 29 |          |    | 1312.6 | sS1-O12  | 39 | sS1-O11  | 39 |          |    |
| 1313.7 | sS1-O12  | 44  | sS1-O11  | 43 |          |    | 1352.6 | sCE1-CZ  | 20 | sCZ-CE2  | 20 | dCE1H    | 19 |
|        |          |     |          |    |          |    |        | dCE2H    | 19 |          |    |          |    |
| 1391.7 | sCZ-CE2  | 17  | sCE1-CZ  | 17 | sCD2-CG  | 16 | 1419.1 | dCGH     | 36 | dCD2H    | 16 | dCD1H    | 16 |
|        | sCG-CD1  | 15  |          |    |          |    |        |          |    |          |    |          |    |
| 1417.0 | dCGH     | 30  |          |    |          |    | 1442.5 | sCE2-CD2 | 17 | sCD1-CE1 | 17 |          |    |
| 1449.9 | dCE1H    | 17  | dCE2H    | 17 | dCD2H    | 16 | 1468.9 | dCD2H    | 28 | dCD1H    | 28 |          |    |
|        | dCD1H    | 16  |          |    |          |    |        |          |    |          |    |          |    |
| 1550.7 | cNH2     | 101 |          |    |          |    | 1487.6 | dCGH     | 25 |          |    |          |    |
| 1566.6 | sCG-CD1  | 20  | sCD2-CG  | 19 | sCZ-CE2  | 18 | 1509.4 | dCE1H    | 24 | dCE2H    | 24 |          |    |
|        | sCE1-CZ  | 17  |          |    |          |    |        |          |    |          |    |          |    |
| 1569.6 | sCD1-CE1 | 23  | sCE2-CD2 | 23 |          |    | 1542.6 | cNH2     | 98 |          |    |          |    |
| 3045.4 | sCG-HG   | 47  | sCD1-HD1 | 24 | sCD2-HD2 | 24 | 3054.0 | sCE2-HE2 | 38 | sCE1-HE1 | 38 |          |    |
| 3055.5 | sCD1-HD1 | 43  | sCD2-HD2 | 43 |          |    | 3054.7 | sCG-HG   | 46 | sCE2-HE2 | 24 | sCE1-HE1 | 24 |
| 3063.8 | sCG-HG   | 46  |          |    |          |    | 3056.1 | sCD1-HD1 | 37 | sCD2-HD2 | 37 |          |    |
| 3072.8 | sCE1-HE1 | 55  | sCE2-HE2 | 31 |          |    | 3056.7 | sCG-HG   | 39 | sCD2-HD2 | 24 | sCD1-HD1 | 24 |
| 3074.2 | sCE2-HE2 | 49  | sCE1-HE1 | 22 |          |    | 3059.7 | sCD1-HD1 | 23 | sCD2-HD2 | 23 | sCE1-HE1 | 20 |
|        |          |     |          |    |          |    |        | sCE2-HE2 | 20 | sCG-HG   | 15 |          |    |
| 3326.5 | sN2-H22  | 50  | sN2-H21  | 50 |          |    | 3340.6 | sN2-H21  | 50 | sN2-H22  | 50 |          |    |
| 3441.1 | sN2-H21  | 50  | sN2-H22  | 50 |          |    | 3420.7 | sN2-H22  | 50 | sN2-H21  | 50 |          |    |

**Table S9.** MM and HF/6-31G(d) level interaction energies (kcal/mol) and distances (Å) of MMSM – water complexes.

| Interaction | Orientation | $\Delta E$ (QM) | $\Delta E$ (MM) | Difference | r (QM) | r (MM) | Difference |
|-------------|-------------|-----------------|-----------------|------------|--------|--------|------------|
| O11...HOH   | 180         | -5.93           | -5.69           | 0.24       | 2.05   | 1.82   | -0.23      |
| O11...HOH   | 270         | -5.51           | -5.95           | -0.44      | 2.08   | 1.81   | -0.27      |
| O12...HOH   | 180         | -5.62           | -5.35           | 0.27       | 2.06   | 1.83   | -0.23      |
| O12...HOH   | 90          | -5.36           | -5.55           | -0.19      | 2.09   | 1.82   | -0.27      |
| N2...HOH    | 270         | -3.69           | -3.47           | 0.22       | 2.23   | 2.10   | -0.13      |
| N2H...OHH   | 0           | -5.32           | -5.10           | 0.22       | 2.04   | 1.85   | -0.19      |

**Table S10.** Gas phase dipole moment (Debye) of MMSM calculated at the MP2/6-31G(d) and MM level of theory.

| $\mu$ | QM      | MM      |
|-------|---------|---------|
| X     | -1.5631 | -2.1943 |
| Y     | 3.2715  | 3.4892  |
| Z     | -1.0665 | -1.2668 |
| Total | 3.7793  | 4.3121  |

**Table S11.** MM and MP2/6-31G(d) level equilibrium geometry of MMSM

| Coordinate      | QM    | MM     | Difference | Coordinate | QM    | MM    | Difference |
|-----------------|-------|--------|------------|------------|-------|-------|------------|
| Bond length (Å) |       |        |            | Angles (°) |       |       |            |
| S1-N2           | 1.681 | 1.630  | -0.051     | N2-S1-C3   | 101.8 | 103.1 | 1.3        |
| S1-O11          | 1.466 | 1.435  | -0.031     | O11-S1-N2  | 110.1 | 109.3 | -0.8       |
| S1-O12          | 1.465 | 1.434  | -0.031     | O12-S1-N2  | 105.6 | 106.2 | 0.7        |
| S1-C3           | 1.778 | 1.771  | -0.007     | O11-S1-C3  | 107.4 | 108.2 | 0.8        |
| N2-H21          | 1.020 | 1.020  | 0.000      | O12-S1-C3  | 108.6 | 107.6 | -0.9       |
| N2-C4           | 1.470 | 1.478  | 0.009      | O11-S1-O12 | 121.7 | 120.9 | -0.7       |
| C3-H31          | 1.091 | 1.108  | 0.017      | S1-N2-H21  | 106.8 | 106.0 | -0.8       |
| C3-H32          | 1.091 | 1.108  | 0.017      | S1-N2-C4   | 116.6 | 116.7 | 0.0        |
| C3-H33          | 1.089 | 1.108  | 0.019      | H21-N2-C4  | 113.5 | 114.2 | 0.7        |
| C4-H41          | 1.091 | 1.112  | 0.021      | S1-C3-H31  | 107.3 | 108.3 | 1.0        |
| C4-H42          | 1.091 | 1.113  | 0.022      | S1-C3-H32  | 109.1 | 108.8 | -0.3       |
| C4-H43          | 1.093 | 1.113  | 0.020      | S1-C3-H33  | 108.7 | 108.7 | 0.0        |
|                 |       |        |            | H31-C3-H32 | 110.0 | 110.2 | 0.3        |
|                 |       |        |            | H31-C3-H33 | 110.8 | 110.2 | -0.6       |
|                 |       |        |            | H32-C3-H33 | 110.9 | 110.5 | -0.4       |
|                 |       |        |            | N2-C4-H41  | 107.3 | 110.7 | 3.4        |
|                 |       |        |            | N2-C4-H42  | 109.2 | 111.2 | 2.0        |
|                 |       |        |            | N2-C4-H43  | 113.4 | 111.1 | -2.3       |
|                 |       |        |            | H41-C4-H42 | 108.2 | 107.8 | -0.4       |
|                 |       |        |            | H41-C4-H43 | 110.0 | 108.0 | -2.0       |
|                 |       |        |            | H42-C4-H43 | 108.7 | 107.9 | -0.7       |
| Dihedrals (°)   |       |        |            |            |       |       |            |
| N2-S1-C3-H31    | 178.9 | -178.4 | 2.7        |            |       |       |            |
| C4-N2-S1-C3     | -98.2 | -97.1  | 1.1        |            |       |       |            |
| H41-C4-N2-S1    | 179.8 | 177.0  | -2.7       |            |       |       |            |

**Table S12.** Scaled MP2/6-31G(d) and MM level vibrational spectra of MMSM.

| QM (scaled by a factor 0.943) |            |    |            |   |            | MM     |            |   |            |   |            |   |
|-------------------------------|------------|----|------------|---|------------|--------|------------|---|------------|---|------------|---|
| Freq                          | Assignment | %  | Assignment | % | Assignment | %      | Assignment | % | Assignment | % | Assignment | % |
| 75.7                          | tS1-N2     | 91 |            |   | 69.7       | tS1-N2 | 100        |   |            |   |            |   |

|        |         |     |         |    |         |    |        |         |     |         |    |         |    |  |
|--------|---------|-----|---------|----|---------|----|--------|---------|-----|---------|----|---------|----|--|
| 162.3  | tN2-C4  | 85  |         |    |         |    | 179.2  | tN2-C4  | 91  |         |    |         |    |  |
| 215.4  | tC3-S1  | 65  |         |    |         |    | 215.3  | tC3-S1  | 93  |         |    |         |    |  |
| 237.5  | tC3-S1  | 32  | iSO2    | 25 | dSNC    | 24 | 270.3  | rSO2    | 26  | dSNC    | 22 | wNH     | 22 |  |
|        |         |     |         |    |         |    |        | iSO2    | 20  |         |    |         |    |  |
| 294.4  | cNSC    | 68  |         |    |         |    | 314.4  | cNSC    | 83  |         |    |         |    |  |
| 307.0  | iSO2    | 53  | rSO2    | 25 |         |    | 334.4  | wSO2    | 47  | iSO2    | 22 |         |    |  |
| 408.8  | rSO2    | 37  | wSO2    | 23 |         |    | 371.6  | iSO2    | 46  | rSO2    | 36 |         |    |  |
| 448.5  | cSO2    | 64  |         |    |         |    | 429.5  | cSO2    | 34  | wSO2    | 17 | rSO2    | 15 |  |
| 488.3  | wSO2    | 48  | sC3-S1  | 15 |         |    | 475.7  | cSO2    | 54  |         |    |         |    |  |
| 604.6  | sS1-N2  | 35  | wNH     | 21 |         |    | 635.3  | dSNC    | 36  | sC3-S1  | 28 | wNH     | 20 |  |
| 713.8  | sC3-S1  | 59  |         |    |         |    | 691.5  | wNH     | 35  | sS1-N2  | 22 | sC3-S1  | 15 |  |
| 833.0  | sS1-N2  | 26  | sC3-S1  | 20 |         |    | 752.3  | sS1-N2  | 37  | sC3-S1  | 34 | wSO2    | 12 |  |
| 968.3  | rC3H3'  | 75  |         |    |         |    | 944.3  | rC3H3   | 87  |         |    |         |    |  |
| 978.6  | rC3H3   | 69  |         |    |         |    | 946.9  | rC3H3'  | 90  |         |    |         |    |  |
| 1046.0 | sN2-C4  | 73  |         |    |         |    | 1043.0 | sN2-C4  | 53  | rNH     | 22 |         |    |  |
| 1101.5 | sS1-O12 | 35  | sS1-O11 | 25 | rC4H3'  | 22 | 1088.0 | rC4H3'  | 65  |         |    |         |    |  |
| 1111.7 | rC4H3'  | 55  |         |    |         |    | 1110.3 | rC4H3   | 30  | sS1-O11 | 19 | sN2-C4  | 15 |  |
| 1118.7 | rC4H3   | 58  |         |    |         |    | 1124.6 | rC4H3   | 30  | sS1-O12 | 28 | sS1-O11 | 17 |  |
| 1297.6 | sS1-O11 | 44  | sS1-O12 | 40 |         |    | 1306.6 | sS1-O11 | 46  | sS1-O12 | 40 |         |    |  |
| 1341.6 | dsC3H3  | 96  |         |    |         |    | 1376.9 | dsC3H3  | 90  |         |    |         |    |  |
| 1380.5 | rNH     | 73  |         |    |         |    | 1386.7 | rNH     | 65  | sN2-C4  | 15 |         |    |  |
| 1422.0 | dsC4H3  | 80  |         |    |         |    | 1424.0 | daC4H3  | 81  |         |    |         |    |  |
| 1430.5 | daC3H3  | 92  |         |    |         |    | 1435.5 | daC4H3' | 82  | rC4H3'  | 16 |         |    |  |
| 1433.0 | daC3H3' | 76  |         |    |         |    | 1439.2 | daC3H3  | 93  |         |    |         |    |  |
| 1462.8 | daC4H3' | 80  |         |    |         |    | 1442.6 | daC3H3' | 93  |         |    |         |    |  |
| 1481.8 | daC4H3  | 75  |         |    |         |    | 1453.5 | dsC4H3  | 99  |         |    |         |    |  |
| 2940.4 | sC4-H43 | 49  | sC4-H41 | 27 | sC4-H42 | 25 | 2843.8 | sC3-H33 | 33  | sC3-H32 | 33 | sC3-H31 | 33 |  |
| 2957.3 | sC3-H31 | 36  | sC3-H32 | 36 | sC3-H33 | 28 | 2915.3 | sC3-H31 | 67  | sC3-H33 | 17 | sC3-H32 | 16 |  |
| 3027.0 | sC4-H43 | 51  | sC4-H42 | 27 | sC4-H41 | 22 | 2916.4 | sC3-H32 | 50  | sC3-H33 | 50 |         |    |  |
| 3043.8 | sC4-H41 | 51  | sC4-H42 | 49 |         |    | 2974.8 | sC4-H41 | 37  | sC4-H43 | 32 | sC4-H42 | 31 |  |
| 3061.3 | sC3-H31 | 51  | sC3-H32 | 50 |         |    | 3020.6 | sC4-H41 | 62  | sC4-H43 | 27 |         |    |  |
| 3076.0 | sC3-H33 | 72  |         |    |         |    | 3022.6 | sC4-H42 | 58  | sC4-H43 | 41 |         |    |  |
| 3357.9 | sN2-H21 | 100 |         |    |         |    | 3339.3 | sN2-H21 | 100 |         |    |         |    |  |

**Table S13.** MM and HF/6-31G(d) level interaction energies (kcal/mol) and distances (Å) of MBSM – water complexes.

| Interaction | Orientation | $\Delta E$ (QM) | $\Delta E$ (MM) | Difference | r (QM) | r (MM) | Difference |
|-------------|-------------|-----------------|-----------------|------------|--------|--------|------------|
| O11...HOH   | 180         | -5.54           | -5.48           | 0.07       | 2.07   | 1.83   | -0.24      |
| O11...HOH   | 270         | -5.63           | -6.01           | -0.39      | 2.07   | 1.80   | -0.27      |
| O12...HOH   | 180         | -5.76           | -5.57           | 0.19       | 2.06   | 1.82   | -0.24      |
| O12...HOH   | 90          | -5.64           | -5.75           | -0.11      | 2.09   | 1.81   | -0.28      |



|           |     |       |       |       |      |      |       |
|-----------|-----|-------|-------|-------|------|------|-------|
| N2...HOH  | 270 | -1.65 | -1.60 | 0.04  | 3.43 | 2.99 | -0.44 |
| N2H...OHH | 0   | -5.47 | -5.55 | -0.08 | 2.04 | 1.83 | -0.21 |

**Table S14.** Gas phase dipole moment (Debye) of MBSM calculated at the MP2/6-31G(d) and MM level of theory.

| $\mu$ | QM      | MM      |
|-------|---------|---------|
| X     | -0.1504 | -0.5223 |
| Y     | -4.2033 | -4.3775 |
| Z     | 1.3805  | 1.8830  |
| Total | 4.4268  | 4.7939  |

**Table S15.** MM and MP2/6-31G(d) level equilibrium geometry of MBSM

| Coordinate      | QM    | MM    | Difference | Coordinate  | QM    | MM    | Difference |
|-----------------|-------|-------|------------|-------------|-------|-------|------------|
| Bond length (Å) |       |       |            | Angles (°)  |       |       |            |
| S1-N2           | 1.680 | 1.641 | -0.039     | N2-S1-CZ    | 100.7 | 101.8 | 1.1        |
| S1-O11          | 1.468 | 1.439 | -0.030     | O11-S1-N2   | 111.2 | 109.7 | -1.4       |
| S1-O12          | 1.465 | 1.437 | -0.028     | O12-S1-N2   | 104.9 | 108.3 | 3.4        |
| S1-CZ           | 1.776 | 1.778 | 0.002      | O11-S1-CZ   | 107.3 | 107.4 | 0.1        |
| N2-H21          | 1.022 | 1.020 | -0.002     | O12-S1-CZ   | 109.7 | 105.7 | -3.9       |
| N2-C3           | 1.469 | 1.478 | 0.009      | O11-S1-O12  | 121.2 | 122.0 | 0.8        |
| CZ-CE1          | 1.398 | 1.411 | 0.013      | S1-N2-H21   | 107.0 | 106.0 | -1.0       |
| CZ-CE2          | 1.395 | 1.411 | 0.016      | S1-N2-C3    | 115.7 | 116.4 | 0.6        |
| CE1-CD1         | 1.394 | 1.400 | 0.007      | H21-N2-C3   | 113.7 | 113.1 | -0.6       |
| CE2-CD2         | 1.397 | 1.401 | 0.004      | S1-CZ-CE1   | 118.8 | 120.1 | 1.3        |
| CG-CD1          | 1.399 | 1.400 | 0.001      | S1-CZ-CE2   | 119.3 | 121.3 | 2.0        |
| CG-CD2          | 1.396 | 1.400 | 0.004      | CE1-CZ-CE2  | 121.9 | 118.6 | -3.3       |
| CE1-HE1         | 1.087 | 1.081 | -0.006     | CZ-CE1-CD1  | 118.7 | 120.7 | 2.0        |
| CE2-HE2         | 1.086 | 1.081 | -0.006     | CZ-CE2-CD2  | 118.7 | 120.7 | 2.0        |
| CD1-HD1         | 1.087 | 1.081 | -0.006     | CG-CD1-CE1  | 120.3 | 119.9 | -0.3       |
| CD2-HD2         | 1.087 | 1.081 | -0.006     | CG-CD2-CE2  | 120.2 | 119.9 | -0.3       |
| CG-HG           | 1.087 | 1.081 | -0.006     | CD1-CG-CD2  | 120.2 | 120.1 | -0.1       |
| C3-H31          | 1.091 | 1.113 | 0.022      | CZ-CE1-HE1  | 120.1 | 119.6 | -0.5       |
| C3-H32          | 1.094 | 1.113 | 0.019      | CZ-CE2-HE2  | 119.6 | 119.8 | 0.2        |
| C3-H33          | 1.092 | 1.112 | 0.021      | CD1-CE1-HE1 | 121.2 | 119.7 | -1.5       |

| Dihedrals (°)  |        |        |      | CD2-CE2-HE2 | 121.7 | 119.5 | -2.2 |
|----------------|--------|--------|------|-------------|-------|-------|------|
| N2-S1-CZ-CE1   | -66.6  | -74.1  | -7.5 | CE1-CD1-HD1 | 119.7 | 120.0 | 0.3  |
| CZ-S1-N2-C3    | -82.2  | -80.6  | 1.6  | CE2-CD2-HD2 | 119.7 | 120.1 | 0.4  |
| S1-N2-C3-H31   | 178.3  | 179.0  | 0.6  | CG-CD1-HD1  | 120.0 | 120.0 | 0.0  |
| S1-CZ-CE1-CD1  | -179.1 | 179.2  | -1.7 | CG-CD2-HD2  | 120.1 | 120.0 | -0.1 |
| CZ-CE1-CD1-CG  | -0.1   | -0.1   | 0.0  | CD1-CG-HG   | 119.9 | 119.9 | 0.1  |
| CE1-CD1-CG-CD2 | 0.3    | 0.0    | -0.3 | CD2-CG-HG   | 119.9 | 119.9 | 0.0  |
| S1-CZ-CE2-CD2  | 179.2  | -179.2 | 1.7  | N2-C3-H31   | 107.6 | 110.6 | 3.0  |
| CZ-CE2-CD2-CG  | 0.1    | 0.1    | 0.0  | N2-C3-H32   | 113.3 | 111.2 | -2.1 |
| CE2-CD2-CG-CD1 | -0.3   | 0.0    | 0.2  | N2-C3-H33   | 108.5 | 111.2 | 2.7  |
|                |        |        |      | H31-C3-H32  | 110.0 | 108.0 | -2.1 |
|                |        |        |      | H31-C3-H33  | 108.3 | 107.7 | -0.6 |
|                |        |        |      | H32-C3-H33  | 109.0 | 108.1 | -0.9 |

**Table S16.** Scaled MP2/6-31G(d) and MM level vibrational spectra of MBSM.

| QM (scaled by a factor 0.943) |            |     |            |    |            |    | MM    |            |     |            |    |            |    |
|-------------------------------|------------|-----|------------|----|------------|----|-------|------------|-----|------------|----|------------|----|
| Freq                          | Assignment | %   | Assignment | %  | Assignment | %  | Freq  | Assignment | %   | Assignment | %  | Assignment | %  |
| 18.2                          | tCZ-S1     | 99  |            |    |            |    | 29.4  | tCZ-S1     | 97  |            |    |            |    |
| 62.9                          | tS1-N2     | 54  | cNSC       | 22 | wCZH       | 20 | 67.2  | tS1-N2     | 75  | wCZH       | 15 |            |    |
| 129.9                         | wCZH       | 43  | tS1-N2     | 32 |            |    | 122.3 | wCZH       | 44  | tN2C3      | 18 |            |    |
| 167.8                         | dCZH       | 41  | tN2C3      | 22 |            |    | 184.0 | tN2C3      | 65  |            |    |            |    |
| 187.2                         | tN2C3      | 56  | dCZH       | 21 |            |    | 215.0 | dCZH       | 61  | rSO2       | 20 |            |    |
| 214.2                         | dSNC       | 29  | iSO2       | 27 | wNH        | 27 | 247.6 | dSNC       | 16  | cNSC       | 16 | iSO2       | 16 |
| 281.0                         | ta6RNG1    | 37  | cNSC       | 21 | iSO2       | 18 | 274.4 | wSO2       | 24  | sCZ-S1     | 23 |            |    |
| 295.7                         | sCZ-S1     | 42  | da6RNG1    | 23 |            |    | 288.1 | iSO2       | 29  | ta6RNG1    | 23 | cNSC       | 19 |
|                               |            |     |            |    |            |    |       | wSO2       | 19  |            |    |            |    |
| 348.0                         | iSO2       | 32  | dCZH       | 16 |            |    | 328.3 | iSO2       | 26  | rSO2       | 22 | dCZH       | 17 |
| 371.9                         | ta6RNG1a   | 113 |            |    |            |    | 375.7 | eSO2       | 17  | rSO2       | 16 | sS1-N2     | 15 |
|                               |            |     |            |    |            |    |       | wSO2       | 15  |            |    |            |    |
| 420.1                         | ta6RNG1    | 35  | cSO2       | 32 |            |    | 413.6 | ta6RNG1a   | 118 |            |    |            |    |
| 445.8                         | rSO2       | 35  |            |    |            |    | 452.6 | dSNC       | 26  | wSO2       | 17 |            |    |
| 487.8                         | tp6RNG1    | 67  |            |    |            |    | 489.1 | ta6RNG1    | 41  | cSO2       | 18 |            |    |
| 521.5                         | tp6RNG1    | 20  | wSO2       | 17 | cSO2       | 17 | 500.5 | cSO2       | 54  |            |    |            |    |
| 545.5                         | wSO2       | 27  |            |    |            |    | 653.5 | tp6RNG1    | 103 |            |    |            |    |
| 590.0                         | da6RNG1a   | 88  |            |    |            |    | 685.2 | da6RNG1a   | 79  |            |    |            |    |
| 614.6                         | sS1-N2     | 27  | wNH        | 21 |            |    | 692.2 | dSNC       | 36  | wNH        | 31 |            |    |
| 683.3                         | da6RNG1    | 44  | sCZ-S1     | 23 |            |    | 725.1 | sS1-N2     | 37  | wNH        | 22 |            |    |
| 697.9                         | wCGH       | 28  | wCE1H      | 22 | wCD1H      | 18 | 746.1 | da6RNG1    | 29  |            |    |            |    |
|                               | wCD2H      | 16  |            |    |            |    |       |            |     |            |    |            |    |
| 789.8                         | wCE1H      | 44  | wCD2H      | 24 | wCE2H      | 21 | 753.3 | wCGH       | 20  |            |    |            |    |

|        |          |     |          |    |          |    |        |          |     |          |     |          |    |
|--------|----------|-----|----------|----|----------|----|--------|----------|-----|----------|-----|----------|----|
| 816.9  | sS1-N2   | 34  | dSNC     | 16 |          |    | 850.3  | wCE2H    | 28  | wCE1H    | 27  | wCD1H    | 23 |
|        |          |     |          |    |          |    |        | wCD2H    | 23  |          |     |          |    |
| 837.7  | wCE2H    | 33  | wCE1H    | 33 | wCD1H    | 24 | 916.5  | wCE1H    | 39  | wCE2H    | 39  | wCGH     | 28 |
|        | wCGH     | 18  |          |    |          |    |        |          |     |          |     |          |    |
| 853.2  | wCGH     | 58  | wCD1H    | 40 |          |    | 949.3  | dt6RNG1  | 68  |          |     |          |    |
| 859.5  | wCD2H    | 52  | wCE2H    | 43 |          |    | 975.8  | sCG-CD1  | 39  | sCD2-CG  | 36  |          |    |
| 958.3  | dt6RNG1  | 66  |          |    |          |    | 991.5  | wCD2H    | 32  | wCD1H    | 31  | wCE1H    | 28 |
|        |          |     |          |    |          |    |        | wCE2H    | 27  | ta6RNG1a | -18 |          |    |
| 1001.9 | sCG-CD1  | 30  | sCD2-CG  | 27 |          |    | 1006.2 | wCGH     | 53  | wCD1H    | 32  | wCD2H    | 31 |
|        |          |     |          |    |          |    |        | tp6RNG1  | -18 |          |     |          |    |
| 1039.4 | sN2-C3   | 72  |          |    |          |    | 1018.7 | sCE2-CD2 | 25  | sCD1-CE1 | 25  |          |    |
| 1058.8 | sCD1-CE1 | 16  | dCE2H    | 15 |          |    | 1042.1 | sN2-C3   | 50  | rNH      | 19  |          |    |
| 1063.9 | sCE2-CD2 | 19  |          |    |          |    | 1069.5 |          |     |          |     |          |    |
| 1105.4 | rCH3'    | 45  |          |    |          |    | 1093.1 | rCH3'    | 66  |          |     |          |    |
| 1113.2 | rCH3     | 52  | rCH3'    | 23 |          |    | 1112.7 | rCH3     | 39  |          |     |          |    |
| 1126.1 | sS1-O11  | 19  | rCH3     | 18 |          |    | 1122.1 | sS1-O12  | 26  | rCH3     | 25  | sS1-O11  | 16 |
| 1149.7 | dCGH     | 40  | dCD2H    | 24 | dCD1H    | 17 | 1198.3 | dCE1H    | 16  |          |     |          |    |
| 1161.4 | dCD1H    | 25  | dCE1H    | 18 | dCE2H    | 16 | 1210.3 | dCGH     | 25  | dCD2H    | 20  | dCD1H    | 17 |
|        | dCD2H    | 16  |          |    |          |    |        |          |     |          |     |          |    |
| 1276.4 | dCE1H    | 25  | dCE2H    | 25 |          |    | 1302.2 | sS1-O11  | 44  | sS1-O12  | 39  |          |    |
| 1287.9 | sS1-O11  | 40  | sS1-O12  | 39 |          |    | 1351.5 | sCZ-CE2  | 22  | dCE1H    | 20  | sCE1-CZ  | 20 |
|        |          |     |          |    |          |    |        | dCE2H    | 19  |          |     |          |    |
| 1367.3 | rNH      | 76  |          |    |          |    | 1380.9 | rNH      | 68  | sN2-C3   | 16  |          |    |
| 1392.7 | sCZ-CE2  | 17  | sCE1-CZ  | 17 | sCD2-CG  | 16 | 1419.1 | dCGH     | 36  | dCD1H    | 17  | dCD2H    | 16 |
| 1416.4 | dCGH     | 29  |          |    |          |    | 1422.8 | daCH3    | 82  |          |     |          |    |
| 1418.7 | dsCH3    | 93  |          |    |          |    | 1437.3 | daCH3'   | 83  | rCH3'    | 16  |          |    |
| 1449.3 | dCE1H    | 18  | dCD2H    | 16 | dCD1H    | 16 | 1442.5 | sCD1-CE1 | 17  | sCE2-CD2 | 17  |          |    |
|        | dCE2H    | 15  |          |    |          |    |        |          |     |          |     |          |    |
| 1462.7 | daCH3'   | 85  |          |    |          |    | 1455.9 | dsCH3    | 100 |          |     |          |    |
| 1482.2 | daCH3    | 82  |          |    |          |    | 1468.9 | dCD1H    | 29  | dCD2H    | 26  |          |    |
| 1565.6 | sCG-CD1  | 22  | sCZ-CE2  | 22 |          |    | 1487.7 | dCGH     | 24  | sCD2-CG  | 15  |          |    |
| 1569.0 | sCD1-CE1 | 24  | sCE2-CD2 | 21 |          |    | 1509.8 | dCE2H    | 28  | dCE1H    | 20  |          |    |
| 2934.0 | sCH2     | 51  | sCH3     | 25 | sCH1     | 23 | 2974.7 | sCH1     | 36  | sCH2     | 32  | sCH3     | 31 |
| 3020.9 | sCH2     | 48  | sCH3     | 36 | sCH1     | 16 | 3020.2 | sCH1     | 63  | sCH2     | 21  | sCH3     | 16 |
| 3040.4 | sCH1     | 60  | sCH3     | 39 |          |    | 3022.6 | sCH3     | 53  | sCH2     | 47  |          |    |
| 3045.2 | sCG-HG   | 48  | sCD1-HD1 | 24 | sCD2-HD2 | 23 | 3054.0 | sCE2-HE2 | 45  | sCE1-HE1 | 27  | sCD1-HD1 | 15 |
| 3055.3 | sCD1-HD1 | 42  | sCD2-HD2 | 42 |          |    | 3054.7 | sCG-HG   | 48  | sCE1-HE1 | 28  | sCE2-HE2 | 17 |
| 3063.1 | sCG-HG   | 43  | sCE1-HE1 | 21 | sCD2-HD2 | 21 | 3056.1 | sCD2-HD2 | 40  | sCD1-HD1 | 31  |          |    |
| 3070.9 | sCE1-HE1 | 64  | sCD1-HD1 | 25 |          |    | 3056.7 | sCG-HG   | 36  | sCD1-HD1 | 31  | sCD2-HD2 | 19 |
| 3075.0 | sCE2-HE2 | 80  |          |    |          |    | 3059.7 | sCD2-HD2 | 22  | sCE1-HE1 | 22  | sCD1-HD1 | 22 |
|        |          |     |          |    |          |    |        | sCE2-HE2 | 19  |          |     |          |    |
| 3338.9 | sN2-H21  | 100 |          |    |          |    | 3338.8 | sN2-H21  | 100 |          |     |          |    |

**Table S17.** MM and HF/6-31G(d) level interaction energies (kcal/mol) and distances (Å) of EESM – water complexes.

| Interaction | Orientation | $\Delta E$ (QM) | $\Delta E$ (MM) | Difference | r (QM) | r (MM) | Difference |
|-------------|-------------|-----------------|-----------------|------------|--------|--------|------------|
| O11...HOH   | 180         | -6.15           | -5.68           | 0.47       | 2.04   | 1.82   | -0.22      |
| O11...HOH   | 270         | -5.66           | -6.01           | -0.35      | 2.08   | 1.81   | -0.27      |
| O12...HOH   | 180         | -5.81           | -5.39           | 0.42       | 2.06   | 1.83   | -0.23      |
| O12...HOH   | 90          | -5.49           | -5.66           | -0.16      | 2.08   | 1.81   | -0.27      |
| N2...HOH    | 270         | -3.93           | -3.41           | 0.53       | 2.24   | 2.14   | -0.10      |
| N2H...OHH   | 0           | -5.22           | -5.22           | 0.00       | 2.06   | 1.85   | -0.21      |

**Table S18.** Gas phase dipole moment (Debye) of EESM calculated at the MP2/6-31G(d) and MM level of theory.

| $\mu$ | QM      | MM      |
|-------|---------|---------|
| X     | -1.5921 | -2.1139 |
| Y     | 3.2270  | 3.5884  |
| Z     | -1.2104 | -1.2655 |
| Total | 3.7965  | 4.3528  |

**Table S19.** MM and MP2/6-31G(d) level equilibrium geometry of EESM

| Coordinate      | QM    | MM    | Difference | Coordinate | QM    | MM    | Difference |
|-----------------|-------|-------|------------|------------|-------|-------|------------|
| Bond length (Å) |       |       |            | Angles (°) |       |       |            |
| S1-N2           | 1.683 | 1.629 | -0.054     | N2-S1-C3   | 101.8 | 102.2 | 0.4        |
| S1-O11          | 1.468 | 1.436 | -0.032     | O11-S1-N2  | 110.3 | 109.2 | -1.1       |
| S1-O12          | 1.468 | 1.435 | -0.033     | O12-S1-N2  | 105.7 | 106.3 | 0.6        |
| S1-C3           | 1.787 | 1.799 | 0.012      | O11-S1-C3  | 107.5 | 108.3 | 0.8        |
| N2-H21          | 1.022 | 1.018 | -0.004     | O12-S1-C3  | 108.7 | 107.8 | -0.8       |
| N2-C4           | 1.474 | 1.476 | 0.002      | O11-S1-O12 | 121.3 | 121.3 | 0.1        |
| C3-H31          | 1.094 | 1.108 | 0.014      | S1-N2-H21  | 106.8 | 107.0 | 0.2        |
| C3-H32          | 1.092 | 1.108 | 0.016      | S1-N2-C4   | 117.0 | 117.7 | 0.6        |
| C3-C5           | 1.524 | 1.540 | 0.016      | H21-N2-C4  | 112.8 | 112.8 | 0.0        |
| C4-H41          | 1.093 | 1.114 | 0.021      | S1-C3-H31  | 106.6 | 106.6 | 0.0        |
| C4-H42          | 1.096 | 1.115 | 0.019      | S1-C3-H32  | 106.1 | 106.6 | 0.5        |
| C4-C6           | 1.520 | 1.526 | 0.006      | S1-C3-C5   | 110.4 | 110.9 | 0.5        |

|        |       |       |       |            |       |       |      |
|--------|-------|-------|-------|------------|-------|-------|------|
| C5-H51 | 1.093 | 1.110 | 0.018 | H31-C3-H32 | 108.9 | 110.1 | 1.2  |
| C5-H52 | 1.092 | 1.112 | 0.020 | H31-C3-C5  | 112.0 | 111.2 | -0.8 |
| C5-H53 | 1.092 | 1.112 | 0.020 | H32-C3-C5  | 112.6 | 111.2 | -1.3 |
| C6-H61 | 1.093 | 1.111 | 0.018 | N2-C4-H41  | 107.6 | 110.3 | 2.7  |
| C6-H62 | 1.094 | 1.111 | 0.017 | N2-C4-H42  | 111.8 | 110.3 | -1.4 |
| C6-H63 | 1.092 | 1.112 | 0.020 | N2-C4-C6   | 108.9 | 108.7 | -0.2 |
|        |       |       |       | H41-C4-H42 | 107.1 | 107.9 | 0.8  |
|        |       |       |       | H41-C4-C6  | 110.2 | 109.8 | -0.4 |
|        |       |       |       | H42-C4-C6  | 111.2 | 109.8 | -1.4 |
|        |       |       |       | C3-C5-H51  | 109.6 | 110.5 | 1.0  |
|        |       |       |       | C3-C5-H52  | 110.5 | 110.5 | 0.0  |
|        |       |       |       | C3-C5-H53  | 110.6 | 110.5 | -0.1 |
|        |       |       |       | H51-C5-H52 | 108.6 | 108.5 | -0.1 |
|        |       |       |       | H51-C5-H53 | 108.8 | 108.5 | -0.3 |
|        |       |       |       | H52-C5-H53 | 108.8 | 108.3 | -0.5 |
|        |       |       |       | C4-C6-H61  | 110.2 | 110.3 | 0.1  |
|        |       |       |       | C4-C6-H62  | 111.0 | 110.9 | -0.1 |
|        |       |       |       | C4-C6-H63  | 110.6 | 110.6 | 0.0  |
|        |       |       |       | H61-C6-H62 | 107.8 | 108.2 | 0.4  |
|        |       |       |       | H61-C6-H63 | 108.9 | 108.3 | -0.6 |
|        |       |       |       | H62-C6-H63 | 108.4 | 108.5 | 0.1  |

  

| Dihedrals (°) |        |        |      |
|---------------|--------|--------|------|
| N2-S1-C3-C5   | 178.1  | -179.1 | 2.8  |
| S1-C3-C5-H51  | 179.1  | 180.0  | 0.9  |
| C4-N2-S1-C3   | -98.9  | -100.1 | -1.2 |
| C6-C4-N2-S1   | 177.7  | 178.9  | 1.2  |
| H61-C6-C4-N2  | -178.5 | -179.2 | -0.7 |

**Table S20.** Scaled MP2/6-31G(d) and MM level vibrational spectra of EESM.

| QM (scaled by a factor 0.943) |            |    |            |    |            | MM |       |            |    |            |    |            |    |
|-------------------------------|------------|----|------------|----|------------|----|-------|------------|----|------------|----|------------|----|
| Freq                          | Assignment | %  | Assignment | %  | Assignment | %  | Freq  | Assignment | %  | Assignment | %  | Assignment | %  |
| 56.1                          | tN2-C4     | 44 | tS1-N2     | 24 |            |    | 49.4  | tS1-N2     | 61 | tN2-C4     | 31 |            |    |
| 63.1                          | tN2-C4     | 43 | tS1-N2     | 39 |            |    | 63.2  | tN2-C4     | 58 | tS1-N2     | 37 |            |    |
| 85.4                          | tC3-S1     | 60 | tS1-N2     | 25 |            |    | 89.7  | tC3-S1     | 86 |            |    |            |    |
| 170.6                         | dSNC       | 36 | wNH        | 18 |            |    | 186.2 | cCCN       | 25 | dSNC       | 17 |            |    |
| 196.6                         | cCCS       | 38 | cNSC       | 32 |            |    | 216.4 | cNSC       | 27 | cCCS       | 26 |            |    |
| 212.0                         | tC4-C6     | 71 |            |    |            |    | 225.6 | tC4-C6     | 71 |            |    |            |    |
| 260.2                         | tC3-C5     | 87 |            |    |            |    | 255.0 | tC3-C5     | 69 |            |    |            |    |
| 311.3                         | cCCN       | 45 | sS1-N2     | 19 |            |    | 265.8 | cCCN       | 22 | sS1-N2     | 19 |            |    |
| 311.4                         | iSO2       | 67 |            |    |            |    | 297.4 | cNSC       | 43 | wSO2       | 18 |            |    |
| 341.4                         | cNSC       | 36 | cCCS       | 20 |            |    | 350.3 | iSO2       | 79 |            |    |            |    |
| 400.5                         | rSO2       | 59 |            |    |            |    | 382.7 | rSO2       | 61 |            |    |            |    |
| 458.4                         | cSO2       | 71 |            |    |            |    | 446.2 | cSO2       | 41 | wSO2       | 24 | cCCS       | 17 |
| 546.1                         | wSO2       | 50 |            |    |            |    | 476.0 | cSO2       | 47 | wSO2       | 18 |            |    |

|        |         |     |         |    |         |    |        |         |     |         |    |         |    |
|--------|---------|-----|---------|----|---------|----|--------|---------|-----|---------|----|---------|----|
| 617.6  | wNH     | 34  | sS1-N2  | 19 |         |    | 626.3  | sC3-S1  | 32  | wNH     | 27 | dSNC    | 25 |
| 695.9  | sC3-S1  | 59  |         |    |         |    | 684.1  | sC3-S1  | 33  | wNH     | 26 |         |    |
| 772.0  | rC3H2   | 54  | rC5H3'  | 32 |         |    | 775.8  | sS1-N2  | 65  |         |    |         |    |
| 783.0  | rC4H2   | 46  | rC6H3'  | 36 |         |    | 812.0  | rC3H2   | 75  | rC5H3'  | 15 |         |    |
| 857.2  | sS1-N2  | 23  | dSNC    | 18 |         |    | 864.1  | rC4H2   | 61  | rC6H3'  | 28 |         |    |
| 917.0  | sC4-C6  | 28  | rC6H3   | 22 | sN2-C4  | 19 | 923.7  | rC6H3   | 51  | sN2-C4  | 23 |         |    |
|        | sS1-N2  | 19  |         |    |         |    |        |         |     |         |    |         |    |
| 966.1  | sC3-C5  | 45  | rC5H3   | 27 | wC3H2   | 17 | 986.8  | rC5H3   | 43  | sC3-C5  | 34 |         |    |
| 1042.4 | iC3H2   | 24  | rC5H3'  | 20 | rC3H2   | 18 | 1029.0 | rC5H3'  | 70  |         |    |         |    |
| 1046.1 | sC4-C6  | 21  |         |    |         |    | 1034.1 | sC4-C6  | 70  |         |    |         |    |
| 1056.2 | sC4-C6  | 27  | sC3-C5  | 19 | rC5H3   | 19 | 1040.2 | sC3-C5  | 47  | rC5H3   | 40 |         |    |
|        | sN2-C4  | 15  |         |    |         |    |        |         |     |         |    |         |    |
| 1093.5 | sS1-O12 | 37  | sS1-O11 | 37 |         |    | 1065.5 | rC6H3'  | 60  | rC4H2   | 27 |         |    |
| 1110.5 | rC6H3   | 32  | sN2-C4  | 29 |         |    | 1113.6 | sS1-O12 | 44  | sS1-O11 | 41 |         |    |
| 1129.4 | rC4H2   | 39  | rC6H3'  | 25 |         |    | 1128.2 | sN2-C4  | 47  | rC6H3   | 28 |         |    |
| 1227.7 | iC3H2   | 48  | rC5H3'  | 28 |         |    | 1198.2 | iC3H2   | 87  |         |    |         |    |
| 1253.1 | iC4H2   | 55  | rC6H3'  | 19 |         |    | 1302.3 | iC4H2   | 70  |         |    |         |    |
| 1285.9 | wC3H2   | 71  |         |    |         |    | 1310.6 | sS1-O11 | 34  | sS1-O12 | 31 | iC4H2   | 23 |
| 1296.7 | sS1-O11 | 33  | sS1-O12 | 32 |         |    | 1334.2 | wC3H2   | 79  |         |    |         |    |
| 1328.7 | wC4H2   | 60  | rNH     | 15 |         |    | 1377.3 | wC4H2   | 44  | rNH     | 31 |         |    |
| 1382.8 | dsC5H3  | 66  |         |    |         |    | 1415.9 | dsC5H3  | 73  |         |    |         |    |
| 1387.3 | dsC6H3  | 39  | dsC5H3  | 28 | rNH     | 22 | 1416.5 | dsC6H3  | 61  |         |    |         |    |
| 1393.1 | dsC6H3  | 42  | wC4H2   | 22 | rNH     | 21 | 1422.9 | daC6H3  | 37  | dsC6H3  | 20 | wC4H2   | 16 |
| 1431.2 | cC3H2   | 99  |         |    |         |    | 1423.7 | daC5H3  | 72  |         |    |         |    |
| 1467.6 | daC5H3' | 87  |         |    |         |    | 1426.0 | daC6H3  | 46  | rNH     | 15 |         |    |
| 1468.1 | daC6H3' | 73  |         |    |         |    | 1430.0 | daC5H3' | 91  |         |    |         |    |
| 1472.5 | daC6H3  | 64  | cC4H2   | 16 |         |    | 1433.7 | daC6H3' | 82  |         |    |         |    |
| 1480.9 | daC5H3  | 92  |         |    |         |    | 1455.1 | cC3H2   | 88  |         |    |         |    |
| 1491.0 | cC4H2   | 81  | daC6H3  | 15 |         |    | 1459.5 | cC4H2   | 77  | wC4H2   | 17 |         |    |
| 2934.3 | sC6-H62 | 42  | sC6-H61 | 29 | sC6-H63 | 24 | 2851.6 | sC3-H32 | 49  | sC3-H31 | 49 |         |    |
| 2936.7 | sC4-H42 | 71  | sC4-H41 | 23 |         |    | 2892.5 | sC3-H31 | 50  | sC3-H32 | 49 |         |    |
| 2947.3 | sC5-H51 | 38  | sC5-H52 | 33 | sC5-H53 | 29 | 2902.7 | sC6-H61 | 31  | sC6-H62 | 29 | sC6-H63 | 28 |
| 2959.7 | sC3-H31 | 64  | sC3-H32 | 35 |         |    | 2902.8 | sC5-H51 | 31  | sC5-H53 | 28 | sC5-H52 | 28 |
| 2991.4 | sC4-H41 | 67  | sC4-H42 | 23 |         |    | 2957.5 | sC6-H61 | 63  | sC6-H62 | 20 |         |    |
| 3016.9 | sC6-H62 | 46  | sC6-H61 | 44 |         |    | 2958.8 | sC5-H51 | 65  | sC5-H52 | 19 | sC5-H53 | 17 |
| 3023.6 | sC3-H32 | 57  | sC3-H31 | 31 |         |    | 2959.8 | sC6-H63 | 53  | sC6-H62 | 44 |         |    |
| 3033.9 | sC5-H51 | 60  | sC5-H52 | 30 |         |    | 2959.9 | sC5-H53 | 50  | sC5-H52 | 49 |         |    |
| 3034.5 | sC6-H63 | 69  | sC6-H61 | 23 |         |    | 2972.6 | sC4-H42 | 48  | sC4-H41 | 46 |         |    |
| 3046.2 | sC5-H53 | 55  | sC5-H52 | 31 |         |    | 2998.0 | sC4-H41 | 51  | sC4-H42 | 48 |         |    |
| 3334.8 | sN2-H21 | 100 |         |    |         |    | 3339.2 | sN2-H21 | 100 |         |    |         |    |

**Table S21.** MM and HF/6-31G(d) level interaction energies (kcal/mol) and distances (Å) of PMSM – water complexes.

| Interaction | Orientation | $\Delta E$ (QM) | $\Delta E$ (MM) | Difference | r (QM) | r (MM) | Difference |
|-------------|-------------|-----------------|-----------------|------------|--------|--------|------------|
| O11...HOH   | 180         | -4.74           | -4.43           | 0.31       | 2.12   | 1.88   | -0.24      |
| O11...HOH   | 270         | -5.26           | -5.24           | 0.02       | 2.10   | 1.84   | -0.26      |
| O12...HOH   | 180         | -4.62           | -4.93           | -0.31      | 2.11   | 1.86   | -0.25      |
| O12...HOH   | 90          | -5.31           | -5.66           | -0.35      | 2.09   | 1.83   | -0.26      |
| N2...HOH    | 270         | -1.60           | -1.62           | -0.02      | 2.44   | 2.22   | -0.22      |
| N2H...OHH   | 0           | -6.51           | -6.47           | 0.04       | 2.04   | 1.85   | -0.19      |

**Table S22.** Gas phase dipole moment (Debye) of PMSM calculated at the MP2/6-31G(d) and MM level of theory.

| $\mu$ | QM     | MM     |
|-------|--------|--------|
| X     | 2.5421 | 2.1314 |
| Y     | 1.4102 | 2.1082 |
| Z     | 4.2351 | 5.4936 |
| Total | 5.1368 | 6.2583 |

**Table S23.** MM and MP2/6-31G(d) level equilibrium geometry of PMSM

| Coordinate      | QM    | MM    | Difference | Coordinate | QM    | MM    | Difference |
|-----------------|-------|-------|------------|------------|-------|-------|------------|
| Bond length (Å) |       |       |            | Angles (°) |       |       |            |
| S1-N2           | 1.683 | 1.639 | -0.044     | N2-S1-C3   | 105.1 | 103.7 | -1.5       |
| S1-O11          | 1.462 | 1.435 | -0.027     | O11-S1-N2  | 104.6 | 106.8 | 2.2        |
| S1-O12          | 1.461 | 1.436 | -0.024     | O12-S1-N2  | 108.0 | 110.6 | 2.6        |
| S1-C3           | 1.785 | 1.777 | -0.008     | O11-S1-C3  | 108.7 | 106.5 | -2.2       |
| N2-H21          | 1.020 | 1.015 | -0.005     | O12-S1-C3  | 106.9 | 107.5 | 0.6        |
| N2-C4           | 1.424 | 1.404 | -0.020     | O11-S1-O12 | 122.4 | 120.5 | -1.9       |
| C4-C51          | 1.401 | 1.404 | 0.003      | S1-N2-H21  | 109.7 | 110.2 | 0.5        |
| C4-C52          | 1.401 | 1.404 | 0.003      | S1-N2-C4   | 120.8 | 121.7 | 0.9        |
| C51-C61         | 1.395 | 1.402 | 0.007      | H21-N2-C4  | 115.1 | 115.4 | 0.3        |
| C52-C62         | 1.395 | 1.403 | 0.008      | N2-C4-C51  | 119.9 | 121.5 | 1.6        |
| C7-C61          | 1.397 | 1.401 | 0.004      | N2-C4-C52  | 119.8 | 118.9 | -0.8       |
| C7-C62          | 1.396 | 1.401 | 0.005      | C51-C4-C52 | 120.3 | 119.5 | -0.8       |
| C51-H51         | 1.085 | 1.081 | -0.004     | C4-C51-C61 | 119.2 | 120.3 | 1.1        |
| C52-H52         | 1.089 | 1.080 | -0.009     | C4-C52-C62 | 119.9 | 120.3 | 0.4        |
| C61-H61         | 1.087 | 1.081 | -0.006     | C7-C61-C51 | 120.8 | 119.9 | -0.9       |

|                |        |        |        |             |       |       |      |
|----------------|--------|--------|--------|-------------|-------|-------|------|
| C62-H62        | 1.087  | 1.081  | -0.006 | C7-C62-C52  | 120.2 | 119.9 | -0.3 |
| C7-H7          | 1.087  | 1.081  | -0.006 | C61-C7-C62  | 119.6 | 120.1 | 0.5  |
| C3-H31         | 1.092  | 1.109  | 0.017  | C4-C51-H51  | 119.4 | 119.7 | 0.2  |
| C3-H32         | 1.091  | 1.108  | 0.017  | C4-C52-H52  | 119.9 | 120.3 | 0.4  |
| C3-H33         | 1.091  | 1.109  | 0.018  | C61-C51-H51 | 121.3 | 120.0 | -1.3 |
| Dihedrals (°)  |        |        |        | C62-C52-H52 | 120.3 | 119.4 | -0.8 |
| N2-S1-C3-H31   | -177.1 | 177.9  | -5.1   | C51-C61-H61 | 119.2 | 120.0 | 0.8  |
| C3-S1-N2-C4    | 52.4   | 65.0   | 12.6   | C52-C62-H62 | 119.5 | 120.2 | 0.6  |
| S1-N2-C4-C51   | 60.1   | 67.9   | 7.8    | C7-C61-H61  | 120.0 | 120.2 | 0.2  |
| N2-C4-C51-C61  | 179.2  | 179.0  | -0.2   | C7-C62-H62  | 120.2 | 119.9 | -0.3 |
| C4-C51-C61-C7  | -1.8   | -0.5   | 1.2    | C61-C7-H7   | 120.2 | 119.9 | -0.3 |
| C51-C61-C7-C62 | 0.6    | -0.1   | -0.7   | C62-C7-H7   | 120.2 | 120.0 | -0.1 |
| N2-C4-C52-C62  | -177.5 | -179.0 | -1.5   | S1-C3-H31   | 107.2 | 108.2 | 1.0  |
| C4-C52-C62-C7  | -1.6   | 0.5    | 2.1    | S1-C3-H32   | 109.2 | 109.3 | 0.1  |
| C52-C62-C7-C61 | 1.1    | 0.1    | -1.0   | S1-C3-H33   | 108.9 | 109.0 | 0.1  |
|                |        |        |        | H31-C3-H32  | 110.3 | 109.9 | -0.3 |
|                |        |        |        | H31-C3-H33  | 110.2 | 109.8 | -0.4 |
|                |        |        |        | H32-C3-H33  | 111.0 | 110.6 | -0.5 |

**Table S24.** Scaled MP2/6-31G(d) and MM level vibrational spectra of PMSM.

| QM (scaled by a factor 0.943) |            |     |            |    |            | MM |       |            |     |            |    |            |    |
|-------------------------------|------------|-----|------------|----|------------|----|-------|------------|-----|------------|----|------------|----|
| Freq                          | Assignment | %   | Assignment | %  | Assignment | %  | Freq  | Assignment | %   | Assignment | %  | Assignment | %  |
| 35.3                          | tNC        | 61  | tS1-N2     | 35 |            |    | 41.1  | tNC        | 52  | tS1-N2     | 44 |            |    |
| 62.0                          | wNH        | 38  | tS1-N2     | 27 | wC4N       | 19 | 66.0  | wNH        | 35  | wC4N       | 20 | tNC        | 19 |
|                               |            |     |            |    |            |    |       | tS1-N2     | 17  |            |    |            |    |
| 114.5                         | dSNC       | 26  | tNC        | 24 | tS1-N2     | 16 | 115.2 | wC4N       | 25  | tNC        | 24 | dSNC       | 18 |
| 205.8                         | ta6RNG1    | 37  | cNSC       | 32 |            |    | 226.4 | tC3-S1     | 46  |            |    |            |    |
| 216.8                         | tC3-S1     | 89  |            |    |            |    | 227.7 | tC3-S1     | 47  | ta6RNG1    | 16 |            |    |
| 256.4                         | iSO2       | 39  | dC4N       | 27 |            |    | 263.7 | cNSC       | 21  |            |    |            |    |
| 272.7                         | iSO2       | 29  | cNSC       | 17 |            |    | 283.8 | iSO2       | 33  | dC4N       | 26 | rSO2       | 17 |
| 334.7                         | rSO2       | 50  |            |    |            |    | 369.7 | cNSC       | 39  | wSO2       | 26 |            |    |
| 350.5                         | wSO2       | 18  | cNSC       | 16 | rSO2       | 15 | 374.6 | iSO2       | 46  | rSO2       | 43 |            |    |
| 378.9                         | ta6RNG1a   | 115 |            |    |            |    | 412.9 | wSO2       | 34  |            |    |            |    |
| 444.4                         | tp6RNG1    | 74  | ta6RNG1    | 25 |            |    | 417.6 | ta6RNG1a   | 114 |            |    |            |    |
| 469.9                         | cSO2       | 59  |            |    |            |    | 457.7 | ta6RNG1    | 40  | cSO2       | 33 |            |    |
| 481.1                         | wSO2       | 27  |            |    |            |    | 482.4 | cSO2       | 44  | ta6RNG1    | 23 |            |    |
| 492.7                         | wC4N       | 30  | cSO2       | 18 |            |    | 572.2 | da6RNG1    | 30  | wNH        | 15 |            |    |
| 532.2                         | wNH        | 31  | wSO2       | 16 |            |    | 631.8 | tp6RNG1    | 35  | wNH        | 26 |            |    |
| 596.0                         | da6RNG1a   | 73  |            |    |            |    | 656.8 | tp6RNG1    | 64  |            |    |            |    |



|        |         |     |         |    |         |    |        |          |     |         |    |         |    |
|--------|---------|-----|---------|----|---------|----|--------|----------|-----|---------|----|---------|----|
| 601.7  | da6RNG1 | 39  | dSNC    | 16 |         |    | 678.5  | da6RNG1a | 52  | sC3-S1  | 17 |         |    |
| 691.0  | wC52H   | 25  | wC7H    | 25 | wC62H   | 18 | 696.0  | da6RNG1a | 24  | sC3-S1  | 18 | dSNC    | 17 |
| 731.8  | sC3-S1  | 61  |         |    |         |    | 747.1  | wC7H     | 18  |         |    |         |    |
| 765.9  | wC52H   | 55  | wC51H   | 23 |         |    | 772.0  | sS1-N2   | 16  |         |    |         |    |
| 798.3  | dSNC    | 14  | sC4-C51 | 14 |         |    | 809.6  | sS1-N2   | 23  | dt6RNG1 | 18 |         |    |
| 805.3  | wC51H   | 36  | wC62H   | 24 | wC52H   | 18 | 857.5  | wC61H    | 28  | wC52H   | 28 | wC62H   | 23 |
|        | wC7H    | 18  |         |    |         |    |        | wC51H    | 20  |         |    |         |    |
| 836.8  | wC62H   | 57  | wC7H    | 31 |         |    | 928.2  | wC52H    | 40  | wC51H   | 39 | wC7H    | 27 |
| 848.6  | wC61H   | 73  | wC51H   | 19 | wC7H    | 16 | 945.8  | rC3H3    | 86  |         |    |         |    |
| 853.6  | sS1-N2  | 40  |         |    |         |    | 952.3  | rC3H3'   | 83  |         |    |         |    |
| 965.5  | dt6RNG1 | 47  |         |    |         |    | 952.8  | dt6RNG1  | 51  | sC4-C51 | 15 | sC52-C4 | 15 |
| 968.3  | rC3H3'  | 62  |         |    |         |    | 975.8  | sC7-C62  | 36  | sC61-C7 | 35 |         |    |
| 974.8  | rC3H3   | 58  |         |    |         |    | 998.2  | wC62H    | 40  | wC51H   | 29 | wC52H   | 29 |
|        |         |     |         |    |         |    |        | ta6RNG1a | -17 | wC61H   | 17 |         |    |
| 1008.7 | sC61-C7 | 29  | sC7-C62 | 29 |         |    | 1007.2 | wC7H     | 48  | wC61H   | 42 | wC62H   | 20 |
|        |         |     |         |    |         |    |        | tp6RNG1  | -18 |         |    |         |    |
| 1064.6 | sC62C52 | 20  | sC51C61 | 16 |         |    | 1021.6 | sC62C52  | 26  | sC51C61 | 23 |         |    |
| 1113.9 | sS1-O11 | 45  | sS1-O12 | 40 |         |    | 1119.4 | sS1-O11  | 44  | sS1-O12 | 40 |         |    |
| 1147.4 | dC7H    | 39  | dC62H   | 24 | dC61H   | 18 | 1155.9 | sC51C61  | 23  | sC62C52 | 21 |         |    |
| 1162.1 | dC52H   | 22  | dC51H   | 21 | dC61H   | 19 | 1207.5 | dC61H    | 23  | dC7H    | 20 |         |    |
| 1204.6 | sN2-C4  | 37  |         |    |         |    | 1225.7 | dC52H    | 18  | rNH     | 17 |         |    |
| 1256.0 | rNH     | 19  | dC51H   | 18 |         |    | 1302.2 | sS1-O12  | 41  | sS1-O11 | 36 |         |    |
| 1312.7 | sS1-O12 | 22  | sS1-O11 | 18 |         |    | 1343.1 | dC51H    | 30  | sC4-C51 | 19 |         |    |
| 1336.8 | dsC3H3  | 99  |         |    |         |    | 1387.2 | dsC3H3   | 93  |         |    |         |    |
| 1353.8 | rNH     | 24  | sS1-O11 | 17 |         |    | 1404.8 | dC52H    | 31  | rNH     | 21 | dC7H    | 18 |
| 1397.6 | sC51C61 | 17  | sC62C52 | 16 |         |    | 1434.9 | rNH      | 20  | dC7H    | 18 | dC61H   | 17 |
| 1428.8 | daC3H3  | 86  |         |    |         |    | 1437.0 | daC3H3   | 86  |         |    |         |    |
| 1432.5 | daC3H3' | 81  |         |    |         |    | 1441.3 | sC51C61  | 15  |         |    |         |    |
| 1441.7 | dC7H    | 22  | rNH     | 16 |         |    | 1444.1 | daC3H3'  | 85  |         |    |         |    |
| 1465.8 | dC61H   | 17  |         |    |         |    | 1470.7 | dC61H    | 29  | dC62H   | 29 |         |    |
| 1570.1 | sC61-C7 | 19  | sC52-C4 | 18 | sC7-C62 | 17 | 1488.1 | dC7H     | 22  |         |    |         |    |
|        | sC4-C51 | 16  |         |    |         |    |        |          |     |         |    |         |    |
| 1579.7 | sC51C61 | 22  | sC62C52 | 22 |         |    | 1548.6 | sN2-C4   | 18  | dC51H   | 17 | dC52H   | 17 |
| 2952.1 | sC3-H32 | 34  | sC3-H31 | 33 | sC3-H33 | 33 | 2844.1 | sC3-H32  | 34  | sC3-H33 | 34 | sC3-H31 | 32 |
| 3029.0 | sC52H52 | 89  |         |    |         |    | 2914.5 | sC3-H31  | 67  | sC3-H33 | 22 |         |    |
| 3046.1 | sC7-H7  | 38  | sC61H61 | 38 | sC62H62 | 17 | 2915.9 | sC3-H32  | 55  | sC3-H33 | 44 |         |    |
| 3054.2 | sC62H62 | 50  | sC61H61 | 42 |         |    | 3054.6 | sC52H52  | 36  | sC61H61 | 31 | sC62H62 | 21 |
| 3060.3 | sC3-H31 | 67  | sC3-H33 | 18 | sC3-H32 | 15 | 3055.2 | sC7-H7   | 56  | sC62H62 | 20 |         |    |
| 3063.9 | sC3-H32 | 51  | sC3-H33 | 49 |         |    | 3056.4 | sC62H62  | 41  | sC52H52 | 29 | sC7-H7  | 24 |
| 3066.2 | sC7-H7  | 59  | sC62H62 | 22 | sC61H61 | 15 | 3057.2 | sC61H61  | 53  | sC51H51 | 34 |         |    |
| 3086.0 | sC51H51 | 95  |         |    |         |    | 3060.5 | sC51H51  | 45  | sC52H52 | 19 |         |    |
| 3360.6 | sN2-H21 | 100 |         |    |         |    | 3332.9 | sN2-H21  | 100 |         |    |         |    |

**Table S25.** MM and HF/6-31G(d) level interaction energies (kcal/mol) and distances (Å) of PBSM – water complexes.

| Interaction | Orientation | $\Delta E$ (QM) | $\Delta E$ (MM) | Difference | r (QM) | r (MM) | Difference |
|-------------|-------------|-----------------|-----------------|------------|--------|--------|------------|
| O11...HOH   | 180         | -4.71           | -4.45           | 0.26       | 2.13   | 1.87   | -0.26      |
| O11...HOH   | 270         | -5.44           | -5.50           | -0.06      | 2.09   | 1.82   | -0.27      |
| O12...HOH   | 180         | -4.97           | -4.92           | 0.04       | 2.08   | 1.85   | -0.23      |
| O12...HOH   | 90          | -5.71           | -5.92           | -0.21      | 2.07   | 1.82   | -0.25      |
| N2...HOH    | 270         | -2.32           | -2.23           | 0.08       | 2.34   | 2.12   | -0.22      |
| N2H...OHH   | 0           | -6.16           | -6.05           | 0.12       | 2.05   | 1.87   | -0.18      |

**Table S26.** Gas phase dipole moment (Debye) of PBSM calculated at the MP2/6-31G(d) and MM level of theory.

| $\mu$ | QM      | MM      |
|-------|---------|---------|
| X     | -2.0777 | -2.0116 |
| Y     | -0.8324 | -0.6319 |
| Z     | 5.4978  | 6.0991  |
| Total | 5.9359  | 6.4533  |

**Table S27.** MM and MP2/6-31G(d) level equilibrium geometry of PBSM

| Coordinate      | QM    | MM    | Difference | Coordinate | QM    | MM    | Difference |
|-----------------|-------|-------|------------|------------|-------|-------|------------|
| Bond length (Å) |       |       |            | Angles (°) |       |       |            |
| S1-N2           | 1.694 | 1.648 | -0.046     | N2-S1-CZ   | 104.9 | 102.2 | -2.7       |
| S1-O11          | 1.463 | 1.438 | -0.025     | O11-S1-N2  | 104.7 | 108.2 | 3.5        |
| S1-O12          | 1.461 | 1.439 | -0.022     | O12-S1-N2  | 106.9 | 111.6 | 4.7        |
| S1-CZ           | 1.777 | 1.783 | 0.006      | O11-S1-CZ  | 108.5 | 105.1 | -3.4       |
| N2-H21          | 1.022 | 1.015 | -0.007     | O12-S1-CZ  | 107.5 | 105.9 | -1.6       |
| N2-C3           | 1.428 | 1.403 | -0.024     | O11-S1-O12 | 123.1 | 121.9 | -1.2       |
| CZ-CE1          | 1.398 | 1.412 | 0.014      | S1-N2-H21  | 108.5 | 109.4 | 0.8        |
| CZ-CE2          | 1.397 | 1.412 | 0.014      | S1-N2-C3   | 117.4 | 120.6 | 3.3        |
| CE1-CD1         | 1.395 | 1.400 | 0.005      | H21-N2-C3  | 114.0 | 114.5 | 0.4        |
| CE2-CD2         | 1.395 | 1.401 | 0.005      | S1-CZ-CE1  | 119.2 | 120.4 | 1.2        |
| CG-CD1          | 1.397 | 1.400 | 0.002      | S1-CZ-CE2  | 119.0 | 121.0 | 2.1        |
| CG-CD2          | 1.397 | 1.400 | 0.002      | CE1-CZ-CE2 | 121.7 | 118.5 | -3.2       |

|                |        |        |        |             |       |       |      |
|----------------|--------|--------|--------|-------------|-------|-------|------|
| CE1-HE1        | 1.086  | 1.081  | -0.005 | CZ-CE1-CD1  | 118.7 | 120.8 | 2.1  |
| CE2-HE2        | 1.087  | 1.081  | -0.006 | CZ-CE2-CD2  | 118.8 | 120.7 | 1.9  |
| CD1-HD1        | 1.087  | 1.081  | -0.006 | CG-CD1-CE1  | 120.4 | 119.9 | -0.4 |
| CD2-HD2        | 1.087  | 1.081  | -0.006 | CG-CD2-CE2  | 120.3 | 120.0 | -0.3 |
| CG-HG          | 1.087  | 1.081  | -0.006 | CD1-CG-CD2  | 120.2 | 120.1 | 0.0  |
| C3-C41         | 1.400  | 1.403  | 0.003  | CZ-CE1-HE1  | 120.1 | 119.7 | -0.4 |
| C3-C42         | 1.400  | 1.403  | 0.004  | CZ-CE2-HE2  | 119.8 | 119.9 | 0.1  |
| C41-C51        | 1.395  | 1.403  | 0.008  | CD1-CE1-HE1 | 121.2 | 119.5 | -1.7 |
| C42-C52        | 1.395  | 1.402  | 0.007  | CD2-CE2-HE2 | 121.4 | 119.4 | -2.0 |
| C51-C6         | 1.397  | 1.401  | 0.005  | CE1-CD1-HD1 | 119.6 | 120.0 | 0.4  |
| C52-C6         | 1.398  | 1.401  | 0.003  | CE2-CD2-HD2 | 119.7 | 120.1 | 0.4  |
| C41-H41        | 1.089  | 1.080  | -0.009 | CG-CD1-HD1  | 120.1 | 120.1 | 0.0  |
| C42-H42        | 1.085  | 1.081  | -0.005 | CG-CD2-HD2  | 120.1 | 120.0 | -0.1 |
| C51-H51        | 1.087  | 1.081  | -0.006 | CD1-CG-HG   | 119.9 | 119.9 | 0.0  |
| C52-H52        | 1.087  | 1.081  | -0.006 | CD2-CG-HG   | 119.9 | 119.9 | 0.0  |
| C6-H6          | 1.087  | 1.081  | -0.006 | N2-C3-C41   | 120.6 | 119.2 | -1.5 |
|                |        |        |        | N2-C3-C42   | 118.9 | 121.2 | 2.3  |
|                |        |        |        | C41-C3-C42  | 120.5 | 119.6 | -0.9 |
|                |        |        |        | C3-C41-C51  | 119.7 | 120.2 | 0.5  |
|                |        |        |        | C3-C42-C52  | 119.3 | 120.3 | 1.0  |
|                |        |        |        | C41-C51-C6  | 120.2 | 119.9 | -0.3 |
|                |        |        |        | C42-C52-C6  | 120.6 | 119.9 | -0.7 |
|                |        |        |        | C51-C6-C52  | 119.8 | 120.1 | 0.3  |
|                |        |        |        | C3-C41-H41  | 119.9 | 120.2 | 0.4  |
|                |        |        |        | C3-C42-H42  | 119.2 | 119.6 | 0.4  |
|                |        |        |        | C51-C41-H41 | 120.4 | 119.6 | -0.9 |
|                |        |        |        | C52-C42-H42 | 121.6 | 120.1 | -1.4 |
|                |        |        |        | C41-C51-H51 | 119.6 | 120.1 | 0.5  |
|                |        |        |        | C42-C52-H52 | 119.4 | 120.0 | 0.6  |
|                |        |        |        | C6-C51-H51  | 120.2 | 120.0 | -0.2 |
|                |        |        |        | C6-C52-H52  | 120.0 | 120.2 | 0.2  |
|                |        |        |        | C51-C6-H6   | 120.1 | 120.0 | -0.1 |
|                |        |        |        | C52-C6-H6   | 120.1 | 119.9 | -0.2 |
| Dihedrals (°)  |        |        |        |             |       |       |      |
| N2-S1-CZ-CE1   | -82.4  | -88.5  | -6.1   |             |       |       |      |
| CZ-S1-N2-C3    | 54.2   | 64.5   | 10.3   |             |       |       |      |
| S1-CZ-CE1-CD1  | 176.3  | 177.8  | 1.5    |             |       |       |      |
| CZ-CE1-CD1-CG  | -0.5   | -0.1   | 0.4    |             |       |       |      |
| CE1-CD1-CG-CD2 | 0.7    | 0.0    | -0.7   |             |       |       |      |
| S1-CZ-CE2-CD2  | -176.6 | -177.9 | -1.2   |             |       |       |      |
| CZ-CE2-CD2-CG  | 1.1    | 0.3    | -0.8   |             |       |       |      |
| CE2-CD2-CG-CD1 | -1.0   | -0.1   | 0.9    |             |       |       |      |
| S1-N2-C3-C41   | -107.8 | -109.9 | -2.1   |             |       |       |      |
| N2-C3-C41-C51  | -178.6 | -179.8 | -1.2   |             |       |       |      |
| C3-C41-C51-C6  | -1.7   | 0.4    | 2.1    |             |       |       |      |
| C41-C51-C6-C52 | 1.1    | 0.1    | -1.0   |             |       |       |      |
| N2-C3-C42-C52  | -179.8 | 179.8  | -0.4   |             |       |       |      |
| C3-C42-C52-C6  | -1.5   | -0.4   | 1.1    |             |       |       |      |
| C42-C52-C6-C51 | 0.5    | -0.1   | -0.6   |             |       |       |      |

**Table S28.** Scaled MP2/6-31G(d) and MM level vibrational spectra of PBSM.

| QM (scaled by a factor 0.943) |            |     |            |    |            |    | MM    |            |     |            |     |            |    |
|-------------------------------|------------|-----|------------|----|------------|----|-------|------------|-----|------------|-----|------------|----|
| Freq                          | Assignment | %   | Assignment | %  | Assignment | %  | Freq  | Assignment | %   | Assignment | %   | Assignment | %  |
| 24.3                          | tS1-N2     | 47  | tCZ-S1     | 24 |            |    | 27.3  | tS1-N2     | 53  | tCZ-S1     | 27  |            |    |
| 36.3                          | tNC        | 46  |            |    |            |    | 33.9  | tCZ-S1     | 55  | tNC        | 31  |            |    |
| 45.9                          | tCZ-S1     | 64  |            |    |            |    | 44.6  | tNC        | 30  | wNH        | 17  |            |    |
| 99.6                          | wCZH       | 40  | wC4N       | 16 |            |    | 106.2 | wC4N       | 32  | dSNC       | 21  |            |    |
| 105.6                         | tNC        | 34  | tS1-N2     | 17 |            |    | 117.1 | wCZH       | 35  | tNC        | 23  |            |    |
| 178.4                         | dCZH       | 62  | rSO2       | 22 |            |    | 218.2 | dCZH       | 20  | cNSC       | 17  |            |    |
| 209.9                         | ta6RNG1    | 29  | ta6RNG1    | 22 | cNSC       | 19 | 227.7 | dCZH       | 44  |            |     |            |    |
| 251.6                         | dC4N       | 18  | iSO2       | 16 |            |    | 248.4 | wSO2       | 22  |            |     |            |    |
| 269.8                         | iSO2       | 41  |            |    |            |    | 270.9 | iSO2       | 62  | dC4N       | 15  |            |    |
| 296.1                         | sCZ-S1     | 36  | da6RNG1    | 20 |            |    | 306.3 | sCZ-S1     | 22  | wSO2       | 18  |            |    |
| 354.4                         | ta6RNG1    | 24  | dC4N       | 20 |            |    | 340.7 | rSO2       | 43  | dCZH       | 19  |            |    |
| 374.6                         | ta6RNG1a   | 111 |            |    |            |    | 350.1 | dC4N       | 35  |            |     |            |    |
| 377.8                         | ta6RNG1a   | 107 |            |    |            |    | 414.1 | ta6RNG1a   | 117 |            |     |            |    |
| 392.8                         | rSO2       | 30  | dCZH       | 20 |            |    | 417.5 | ta6RNG1a   | 116 |            |     |            |    |
| 437.1                         | tp6RNG1    | 27  | ta6RNG1    | 22 | ta6RNG1    | 17 | 448.5 | wSO2       | 22  |            |     |            |    |
| 442.7                         | tp6RNG1    | 42  |            |    |            |    | 473.5 | ta6RNG1    | 48  | wC4N       | 17  |            |    |
| 470.0                         | tp6RNG1    | 26  | wC4N       | 25 |            |    | 492.4 | ta6RNG1    | 41  | cSO2       | 17  |            |    |
| 500.6                         | tp6RNG1    | 45  | cSO2       | 29 |            |    | 503.3 | cSO2       | 52  |            |     |            |    |
| 524.2                         | tp6RNG1    | 19  | wNH        | 16 | wSO2       | 15 | 583.2 | da6RNG1    | 34  | tp6RNG1    | 15  |            |    |
| 552.4                         | tp6RNG1    | 28  | wSO2       | 21 |            |    | 651.5 | tp6RNG1    | 66  | tp6RNG1    | 28  |            |    |
| 580.1                         | da6RNG1    | 19  | wNH        | 18 |            |    | 657.9 | tp6RNG1    | 71  | tp6RNG1    | 26  |            |    |
| 589.5                         | da6RNG1a   | 89  |            |    |            |    | 674.3 | da6RNG1a   | 67  |            |     |            |    |
| 596.6                         | da6RNG1a   | 82  |            |    |            |    | 686.3 | da6RNG1a   | 81  |            |     |            |    |
| 626.4                         | sS1-N2     | 23  | da6RNG1    | 20 |            |    | 710.3 | wNH        | 35  | dSNC       | 21  |            |    |
| 688.6                         | wC52H      | 22  | wC7H       | 20 |            |    | 726.5 | sS1-N2     | 26  | da6RNG1    | 19  |            |    |
| 698.5                         | da6RNG1    | 18  |            |    |            |    | 744.3 | da6RNG1    | 29  |            |     |            |    |
| 706.5                         | wCGH       | 22  |            |    |            |    | 751.5 | wCGH       | 26  | wCD1H      | 17  | wCD2H      | 17 |
| 762.6                         | wC52H      | 53  | wC51H      | 28 |            |    | 768.3 | wC7H       | 18  |            |     |            |    |
| 795.3                         | wCE1H      | 36  | wCE2H      | 25 | wCD2H      | 23 | 806.6 | dt6RNG1    | 20  | sS1-N2     | 18  |            |    |
|                               | wCD1H      | 15  |            |    |            |    |       |            |     |            |     |            |    |
| 802.4                         | wC7H       | 29  | wC51H      | 29 | wC52H      | 17 | 851.2 | wCE2H      | 27  | wCE1H      | 26  | wCD1H      | 23 |
|                               | wC62H      | 17  |            |    |            |    |       | wCD2H      | 23  |            |     |            |    |
| 805.9                         | dSNC       | 15  |            |    |            |    | 856.7 | wC52H      | 28  | wC61H      | 28  | wC62H      | 23 |
|                               |            |     |            |    |            |    |       | wC51H      | 21  |            |     |            |    |
| 834.1                         | wC62H      | 53  | wC7H       | 24 |            |    | 917.4 | wCE1H      | 40  | wCE2H      | 39  | wCGH       | 28 |
| 843.3                         | wCE1H      | 41  | wCGH       | 29 | wCE2H      | 28 | 927.2 | wC52H      | 40  | wC51H      | 40  | wC7H       | 27 |
| 844.7                         | wC61H      | 63  | wC51H      | 22 |            |    | 949.4 | dt6RNG1    | 68  |            |     |            |    |
| 849.3                         | sS1-N2     | 28  |            |    |            |    | 952.6 | dt6RNG1    | 56  | sC4-C72    | 16  | sC52-C4    | 16 |
| 854.1                         | wCD1H      | 44  | wCGH       | 43 |            |    | 975.5 | sC7-C62    | 36  | sC61-C7    | 35  |            |    |
| 861.7                         | wCD2H      | 48  | wCE2H      | 42 | wCD1H      | 16 | 976.5 | sCG-CD1    | 37  | sCD2-CG    | 37  |            |    |
| 957.5                         | dt6RNG1    | 66  |            |    |            |    | 992.1 | wCD2H      | 32  | wCD1H      | 31  | wCE1H      | 28 |
|                               |            |     |            |    |            |    |       | wCE2H      | 27  | ta6RNG1a   | -18 |            |    |

|        |          |    |          |    |          |    |        |          |     |          |     |          |    |
|--------|----------|----|----------|----|----------|----|--------|----------|-----|----------|-----|----------|----|
| 967.0  | dt6RNG1  | 65 |          |    |          |    | 997.4  | wC62H    | 39  | wC51H    | 30  | wC52H    | 29 |
|        |          |    |          |    |          |    |        | wC61H    | 19  | ta6RNG1a | -18 |          |    |
| 1001.9 | sCD2-CG  | 29 | sCG-CD1  | 29 |          |    | 1006.4 | wCGH     | 53  | wCD1H    | 32  | wCD2H    | 31 |
|        |          |    |          |    |          |    |        | tp6RNG1  | -18 |          |     |          |    |
| 1006.4 | sC61-C7  | 28 | sC7-C62  | 28 |          |    | 1006.9 | wC7H     | 49  | wC61H    | 40  | wC62H    | 22 |
|        |          |    |          |    |          |    |        | tp6RNG1  | -18 |          |     |          |    |
| 1059.2 | sCD1-CE1 | 15 |          |    |          |    | 1019.7 | sCD1-CE1 | 25  | sCE2-CD2 | 25  |          |    |
| 1061.2 | sC62C73  | 19 | sC51C61  | 16 |          |    | 1020.7 | sC62C73  | 26  | sC51C61  | 23  |          |    |
| 1063.8 | sCE2-CD2 | 21 |          |    |          |    | 1071.4 | sCZ-S1   | 14  |          |     |          |    |
| 1122.9 | sS1-O11  | 32 | sS1-O12  | 29 |          |    | 1118.2 | sS1-O11  | 34  | sS1-O12  | 31  |          |    |
| 1146.6 | dC7H     | 40 | dC62H    | 21 | dC61H    | 20 | 1155.0 | sC51C61  | 23  | sC62C73  | 21  |          |    |
| 1149.7 | dCGH     | 39 | dCD2H    | 24 | dCD1H    | 18 | 1200.8 | dCE1H    | 15  |          |     |          |    |
| 1158.0 | dC52H    | 23 | dC51H    | 21 | dC62H    | 18 | 1206.4 | dC61H    | 22  | dC7H     | 18  |          |    |
|        | dC61H    | 16 |          |    |          |    |        |          |     |          |     |          |    |
| 1162.5 | dCD1H    | 24 | dCE1H    | 18 | dCE2H    | 17 | 1210.4 | dCGH     | 25  | dCD2H    | 19  | dCD1H    | 18 |
|        | dCD2H    | 17 |          |    |          |    |        |          |     |          |     |          |    |
| 1201.7 | sN2-C3   | 41 |          |    |          |    | 1223.7 | dC52H    | 17  | rNH      | 17  |          |    |
| 1248.8 | rNH      | 25 | dC51H    | 16 |          |    | 1297.3 | sS1-O12  | 40  | sS1-O11  | 36  |          |    |
| 1277.9 | dCE1H    | 30 | dCE2H    | 28 |          |    | 1337.4 | dC51H    | 28  | sC4-C72  | 17  |          |    |
| 1305.0 | sS1-O12  | 22 | sS1-O11  | 18 |          |    | 1354.5 | sCZ-CE2  | 20  | sCE1-CZ  | 19  | dCE2H    | 18 |
|        |          |    |          |    |          |    |        | dCE1H    | 18  |          |     |          |    |
| 1344.0 | rNH      | 29 | sS1-O11  | 19 | sS1-O12  | 17 | 1400.7 | dC52H    | 33  | rNH      | 25  |          |    |
| 1393.3 | sCE1-CZ  | 18 | sCZ-CE2  | 17 |          |    | 1419.5 | dCGH     | 36  | dCD1H    | 17  | dCD2H    | 16 |
| 1398.8 | sC62C73  | 16 | sC51C61  | 15 |          |    | 1431.9 | dC7H     | 23  | rNH      | 20  |          |    |
| 1415.5 | dCGH     | 28 |          |    |          |    | 1440.2 | sC51C61  | 18  |          |     |          |    |
| 1436.5 | dC7H     | 25 |          |    |          |    | 1443.3 | sCD1-CE1 | 16  | sCE2-CD2 | 16  |          |    |
| 1446.8 | dCE1H    | 18 | dCE2H    | 17 | dCD2H    | 16 | 1469.4 | dCD1H    | 25  | dCD2H    | 25  |          |    |
|        | dCD1H    | 15 |          |    |          |    |        |          |     |          |     |          |    |
| 1463.5 | dC61H    | 17 |          |    |          |    | 1470.3 | dC61H    | 27  | dC62H    | 26  |          |    |
| 1562.6 | sCD2-CG  | 22 | sCE1-CZ  | 18 | sCG-CD1  | 17 | 1487.3 | dC7H     | 23  |          |     |          |    |
|        | sCZ-CE2  | 15 |          |    |          |    |        |          |     |          |     |          |    |
| 1566.3 | sCE2-CD2 | 23 | sCD1-CE1 | 23 |          |    | 1488.5 | dCGH     | 24  |          |     |          |    |
| 1569.6 | sC52-C4  | 22 | sC61-C7  | 22 |          |    | 1511.2 | dCE2H    | 25  | dCE1H    | 24  |          |    |
| 1577.2 | sC51C61  | 21 | sC62C73  | 20 |          |    | 1547.0 | sN2-C3   | 18  | dC52H    | 17  | dC51H    | 17 |
| 3031.2 | sC52H73  | 84 |          |    |          |    | 3053.8 | sCE2-HE2 | 53  | sCE1-HE1 | 25  |          |    |
| 3044.5 | sCG-HG   | 47 | sCD2-HD2 | 27 | sCD1-HD1 | 21 | 3054.6 | sCG-HG   | 41  | sCE1-HE1 | 33  |          |    |
| 3044.8 | sC7-H7   | 42 | sC61H61  | 35 |          |    | 3054.7 | sC61H61  | 33  | sC52H73  | 30  | sC62H62  | 24 |
| 3053.6 | sC62H62  | 47 | sC61H61  | 43 |          |    | 3055.2 | sC7-H7   | 63  |          |     |          |    |
| 3054.4 | sCD1-HD1 | 43 | sCD2-HD2 | 41 |          |    | 3056.0 | sCD2-HD2 | 44  | sCD1-HD1 | 33  |          |    |
| 3062.5 | sCG-HG   | 43 | sCE2-HE2 | 22 | sCD1-HD1 | 21 | 3056.6 | sC62H62  | 44  | sC52H73  | 32  | sC7-H7   | 18 |
| 3064.4 | sC7-H7   | 54 | sC62H62  | 25 | sC61H61  | 16 | 3056.6 | sCG-HG   | 40  | sCD1-HD1 | 30  | sCD2-HD2 | 16 |
| 3069.5 | sCE2-HE2 | 63 | sCD2-HD2 | 25 |          |    | 3057.2 | sC61H61  | 52  | sC51H51  | 36  |          |    |
| 3074.5 | sCE1-HE1 | 81 |          |    |          |    | 3059.7 | sCD1-HD1 | 23  | sCD2-HD2 | 23  | sCE1-HE1 | 21 |
|        |          |    |          |    |          |    |        | sCE2-HE2 | 17  |          |     |          |    |

|        |         |     |  |  |  |  |        |         |     |         |    |
|--------|---------|-----|--|--|--|--|--------|---------|-----|---------|----|
| 3081.7 | sC51H51 | 93  |  |  |  |  | 3060.5 | sC51H51 | 43  | sC52H73 | 21 |
| 3334.3 | sN2-H21 | 100 |  |  |  |  | 3333.1 | sN2-H21 | 100 |         |    |

**Table 29.** Scaled MP2/6-31G(d) and MM level vibrational spectra of OBTZ.

| QM (scaled by a factor 0.943) |            |    |            |    |            | MM |        |            |    |            |    |            |    |
|-------------------------------|------------|----|------------|----|------------|----|--------|------------|----|------------|----|------------|----|
| Freq                          | Assignment | %  | Assignment | %  | Assignment | %  | Freq   | Assignment | %  | Assignment | %  | Assignment | %  |
| 63.6                          | ta6RNG1a   | 74 |            |    |            |    | 86.6   | ta6RNG1a   | 71 |            |    |            |    |
| 111.6                         | BFLY       | 36 | ta6RNG1    | 33 |            |    | 124.5  | BFLY       | 41 | ta6RNG1    | 25 |            |    |
| 196.5                         | ta6RNG2a   | 26 | ta6RNG1    | 23 | BFLY       | 16 | 208.8  | ta6RNG1    | 31 | BFLY       | 19 |            |    |
| 235.5                         | sC10-S1    | 25 | da6RNG2    | 24 |            |    | 225.5  | wS1O       | 35 | sC10-S1    | 22 |            |    |
| 249.5                         | iS1O       | 40 | tp6RNG1    | 18 |            |    | 279.8  | iS1O       | 44 | tp6RNG1    | 17 |            |    |
| 304.5                         | ta6RNG2a   | 21 | da6RNG1a   | 18 | cS1O       | 16 | 306.5  | da6RNG1a   | 22 | rS1O       | 16 |            |    |
| 319.3                         | da6RNG1a   | 30 | ta6RNG2a   | 19 |            |    | 326.4  | da6RNG1a   | 35 |            |    |            |    |
| 375.5                         | da6RNG1    | 33 |            |    |            |    | 362.4  | da6RNG1    | 32 | wS1O       | 22 |            |    |
| 401.1                         | da6RNG1    | 24 | iS1O       | 20 |            |    | 384.4  | sC10-S1    | 12 | ta6RNG1    | 12 |            |    |
| 450.6                         | tp6RNG2    | 32 | ta6RNG2a   | 29 |            |    | 422.6  | ta6RNG2a   | 51 | wN4H       | 19 |            |    |
| 452.9                         | tp6RNG2    | 52 | ta6RNG2    | 15 |            |    | 449.8  | wS1O       | 22 | da6RNG1    | 15 | sC10-S1    | 15 |
| 478.5                         | wN4H       | 36 | cS1O       | 20 | da6RNG1a   | 15 | 467.5  | cS1O       | 25 | ta6RNG2a   | 21 |            |    |
| 482.2                         | rS1O       | 21 | wS1O       | 20 |            |    | 497.5  | ta6RNG2    | 54 |            |    |            |    |
| 502.4                         | wN4H       | 20 |            |    |            |    | 528.8  | cS1O       | 29 | wN4H       | 16 | dt6RNG1    | 16 |
| 552.0                         | cS1O       | 22 | da6RNG2a   | 21 |            |    | 554.3  | da6RNG2a   | 19 | wN4H       | 19 |            |    |
| 563.4                         | tp6RNG1    | 30 | ta6RNG2    | 19 |            |    | 634.8  | dt6RNG1    | 35 | wN4H       | 16 |            |    |
| 648.0                         | da6RNG2a   | 23 |            |    |            |    | 683.1  | tp6RNG2    | 80 |            |    |            |    |
| 667.4                         | dt6RNG1    | 23 | da6RNG2    | 18 |            |    | 721.0  | sS1-N2     | 51 |            |    |            |    |
| 705.7                         | wC6H       | 22 | wC8H       | 19 | wC7H       | 16 | 735.7  | da6RNG2    | 26 | da6RNG2a   | 23 | sC5-C10    | 16 |
| 712.5                         | sS1-N2     | 22 |            |    |            |    | 771.5  | wC8H       | 33 | wC7H       | 32 | wC9H       | 17 |
|                               |            |    |            |    |            |    |        | wC6H       | 15 |            |    |            |    |
| 769.2                         | wC6H       | 59 | wC9H       | 25 | wC8H       | 18 | 798.9  | dt6RNG2    | 31 | da6RNG2    | 18 |            |    |
| 789.0                         | dt6RNG2    | 23 | wN2H       | 15 |            |    | 861.3  | wN2H       | 74 |            |    |            |    |
| 833.9                         | wC9H       | 67 | wC8H       | 28 |            |    | 876.8  | wC9H       | 43 | wC6H       | 42 |            |    |
| 836.4                         | wC7H       | 70 | wC8H       | 29 |            |    | 966.1  | wC6H       | 40 | wC9H       | 39 | wC8H       | 19 |
|                               |            |    |            |    |            |    |        | wC7H       | 17 |            |    |            |    |
| 844.4                         | wN2H       | 28 | sS1-N2     | 17 |            |    | 989.1  | sC8-C7     | 48 | sC9-C8     | 19 | sC7-C6     | 17 |
| 992.5                         | sC3-N4     | 34 | sN2-C3     | 18 | dt6RNG2    | 18 | 997.4  | rC3H2      | 43 | dt6RNG2    | 17 |            |    |
| 1015.1                        | sC8-C7     | 31 | sC7-C6     | 17 |            |    | 1004.2 | wC8H       | 49 | wC7H       | 49 |            |    |
| 1041.6                        | dt6RNG2    | 13 |            |    |            |    | 1045.8 | sC7-C6     | 18 | sC6-C5     | 15 |            |    |
| 1054.0                        | sC3-N4     | 24 | rC3H2      | 17 | sN2-C3     | 16 | 1059.9 | sC3-N4     | 43 | rC3H2      | 24 |            |    |
| 1089.0                        | sN2-C3     | 36 | rC3H2      | 33 |            |    | 1084.8 | sC9-C8     | 20 |            |    |            |    |
| 1113.6                        | ssS1O      | 39 |            |    |            |    | 1096.1 | sN2-C3     | 41 | ssS1O      | 16 |            |    |
| 1130.5                        | ssS1O      | 38 |            |    |            |    | 1119.8 | ssS1O      | 55 |            |    |            |    |
| 1151.5                        | dC8H       | 33 | dC7H       | 33 |            |    | 1177.9 | sC10-C9    | 17 | sN4-C5     | 17 | sC7-C6     | 15 |
| 1213.3                        | iC3H2      | 48 |            |    |            |    | 1230.0 | dC8H       | 19 | dC9H       | 15 | dC7H       | 15 |
| 1234.6                        | sN4-C5     | 35 |            |    |            |    | 1264.0 | dC6H       | 21 | sC6-C5     | 18 | dN4H       | 15 |

|        |         |     |         |    |        |    |        |        |    |         |    |        |    |  |  |  |  |  |  |
|--------|---------|-----|---------|----|--------|----|--------|--------|----|---------|----|--------|----|--|--|--|--|--|--|
| 1243.2 | dC6H    | 19  | iC3H2   | 19 | dC9H   | 18 | 1301.2 | saS1O  | 76 |         |    |        |    |  |  |  |  |  |  |
| 1302.2 | saS1O   | 56  |         |    |        |    | 1324.1 | iC3H2  | 76 |         |    |        |    |  |  |  |  |  |  |
| 1317.9 | wC3H2   | 46  | saS1O   | 25 |        |    | 1384.4 | dN2H   | 53 |         |    |        |    |  |  |  |  |  |  |
| 1375.0 | dN2H    | 25  |         |    |        |    | 1403.3 | wC3H2  | 17 |         |    |        |    |  |  |  |  |  |  |
| 1388.5 | dN2H    | 31  | wC3H2   | 16 |        |    | 1427.1 | wC3H2  | 39 | dC8H    | 16 | dC7H   | 16 |  |  |  |  |  |  |
| 1403.3 | sC10-C9 | 21  | dC7H    | 19 |        |    | 1429.7 | wC3H2  | 19 | sC5-C10 | 16 | dC7H   | 16 |  |  |  |  |  |  |
| 1454.2 | dN4H    | 33  |         |    |        |    | 1454.2 | dN4H   | 23 | dC6H    | 21 | dC8H   | 16 |  |  |  |  |  |  |
| 1459.8 | sN4-C5  | 14  |         |    |        |    | 1474.5 | dC9H   | 22 | sC9-C8  | 21 |        |    |  |  |  |  |  |  |
| 1481.7 | cC3H2   | 83  |         |    |        |    | 1478.2 | cC3H2  | 84 |         |    |        |    |  |  |  |  |  |  |
| 1559.0 | sC8-C7  | 25  | sC5-C10 | 21 |        |    | 1482.0 | dC9H   | 24 | dC7H    | 22 | sC8-C7 | 15 |  |  |  |  |  |  |
| 1586.1 | sC7-C6  | 23  | sC10-C9 | 15 |        |    | 1546.5 | sN4-C5 | 19 | dC6H    | 18 | sC6-C5 | 16 |  |  |  |  |  |  |
| 2922.9 | ssC3H2  | 85  |         |    |        |    | 3035.4 | ssC3H2 | 90 |         |    |        |    |  |  |  |  |  |  |
| 3000.8 | saC3H2  | 85  |         |    |        |    | 3055.3 | sC6-H6 | 40 | sC8-H8  | 25 | sC9-H9 | 23 |  |  |  |  |  |  |
| 3031.2 | sC6-H6  | 88  |         |    |        |    | 3056.1 | sC7-H7 | 50 | sC8-H8  | 23 | sC9-H9 | 16 |  |  |  |  |  |  |
| 3049.4 | sC9-H9  | 47  | sC8-H8  | 23 | sC7-H7 | 23 | 3057.1 | sC8-H8 | 40 | sC7-H7  | 22 | sC9-H9 | 19 |  |  |  |  |  |  |
|        |         |     |         |    |        |    |        | sC6-H6 | 19 |         |    |        |    |  |  |  |  |  |  |
| 3055.0 | sC7-H7  | 53  | sC9-H9  | 41 |        |    | 3059.5 | sC9-H9 | 42 | sC6-H6  | 30 | sC7-H7 | 15 |  |  |  |  |  |  |
| 3071.0 | sC8-H8  | 75  |         |    |        |    | 3059.7 | saC3H2 | 90 |         |    |        |    |  |  |  |  |  |  |
| 3324.6 | sN2-H2  | 100 |         |    |        |    | 3339.0 | sN2-H2 | 99 |         |    |        |    |  |  |  |  |  |  |
| 3383.8 | sN4-H4  | 100 |         |    |        |    | 3353.9 | sN4-H4 | 99 |         |    |        |    |  |  |  |  |  |  |

**Table S30.** MM and HF/6-31G(d) level interaction energies (kcal/mol) and distances (Å) of DMSN – water complexes.

| Interaction | Orientation | $\Delta E$ (QM) | $\Delta E$ (MM) | Difference | r (QM) | r (MM) | Difference |
|-------------|-------------|-----------------|-----------------|------------|--------|--------|------------|
| O11...HOH   | 90          | -5.11           | -5.19           | -0.07      | 2.09   | 1.83   | -0.26      |
| O11...HOH   | 180         | -7.24           | -7.54           | -0.30      | 2.00   | 1.78   | -0.22      |

**Table S31.** Gas phase dipole moment (Debye) of DMSN calculated at the MP2/6-31G(d) and MM level of theory.

| $\mu$ | QM      | MM      |
|-------|---------|---------|
| X     | -2.9295 | -3.8470 |
| Y     | 3.5790  | 4.6999  |
| Z     | 0.0000  | 0.0000  |
| Total | 4.6250  | 6.0736  |

**Table S32.** MM and MP2/6-31G(d) level equilibrium geometry of DMSN

| Coordinate      | QM    | MM    | Difference | Coordinate | QM    | MM    | Difference |
|-----------------|-------|-------|------------|------------|-------|-------|------------|
| Bond length (Å) |       |       |            | Angles (°) |       |       |            |
| S1-O11          | 1.469 | 1.437 | -0.033     | C2-S1-C3   | 103.6 | 103.6 | 0.0        |
| S1-O12          | 1.469 | 1.437 | -0.033     | O11-S1-C2  | 107.7 | 107.7 | 0.0        |
| S1-C2           | 1.785 | 1.781 | -0.004     | O12-S1-C2  | 107.7 | 107.7 | 0.0        |
| S1-C3           | 1.785 | 1.781 | -0.004     | O11-S1-C3  | 107.7 | 107.7 | 0.0        |
| C2-H21          | 1.092 | 1.110 | 0.018      | O12-S1-C3  | 107.7 | 107.7 | 0.0        |
| C2-H22          | 1.091 | 1.109 | 0.018      | O11-S1-O12 | 121.1 | 121.1 | 0.0        |
| C2-H23          | 1.091 | 1.109 | 0.018      | S1-C2-H21  | 106.2 | 108.3 | 2.1        |
| C3-H31          | 1.092 | 1.110 | 0.018      | S1-C2-H22  | 109.7 | 109.4 | -0.4       |
| C3-H32          | 1.091 | 1.109 | 0.018      | S1-C2-H23  | 109.7 | 109.4 | -0.4       |
| C3-H33          | 1.091 | 1.109 | 0.018      | H21-C2-H22 | 109.9 | 109.6 | -0.2       |
| Dihedrals (°)   |       |       |            | H21-C2-H23 | 109.9 | 109.6 | -0.2       |
| C2-S1-C3-H32    | 61.3  | 60.6  | -0.8       | H22-C2-H23 | 111.4 | 110.5 | -0.9       |
| C3-S1-C2-H22    | 61.3  | 60.6  | -0.8       | S1-C3-H31  | 106.2 | 108.3 | 2.1        |
|                 |       |       |            | S1-C3-H32  | 109.7 | 109.4 | -0.4       |
|                 |       |       |            | S1-C3-H33  | 109.7 | 109.4 | -0.4       |
|                 |       |       |            | H31-C3-H32 | 109.9 | 109.6 | -0.2       |
|                 |       |       |            | H31-C3-H33 | 109.9 | 109.6 | -0.2       |
|                 |       |       |            | H32-C3-H33 | 111.4 | 110.5 | -0.9       |

**Table S33.** Scaled MP2/6-31G(d) and MM level vibrational spectra of DMSN.

| QM (scaled by a factor 0.943) |            |    |            |    |            | MM |        |            |    |            |    |            |   |
|-------------------------------|------------|----|------------|----|------------|----|--------|------------|----|------------|----|------------|---|
| Freq                          | Assignment | %  | Assignment | %  | Assignment | %  | Freq   | Assignment | %  | Assignment | %  | Assignment | % |
| 190.2                         | tS1-C2     | 50 | tS1-C3     | 50 |            |    | 217.2  | tS1-C3     | 50 | tS1-C2     | 50 |            |   |
| 219.6                         | tS1-C3     | 49 | tS1-C2     | 49 |            |    | 222.6  | tS1-C3     | 50 | tS1-C2     | 50 |            |   |
| 261.9                         | cSCC       | 88 |            |    |            |    | 319.8  | cSCC       | 95 |            |    |            |   |
| 275.8                         | iSO2       | 94 |            |    |            |    | 363.8  | iSO2       | 98 |            |    |            |   |
| 347.5                         | rSO2       | 87 |            |    |            |    | 379.8  | wSO2       | 86 |            |    |            |   |
| 429.8                         | wSO2       | 79 |            |    |            |    | 382.1  | rSO2       | 94 |            |    |            |   |
| 462.1                         | cSO2       | 87 |            |    |            |    | 454.2  | eSO2       | 85 |            |    |            |   |
| 674.5                         | sS1-C2     | 44 | sS1-C3     | 44 |            |    | 652.0  | sS1-C2     | 37 | sS1-C3     | 37 |            |   |
| 744.9                         | sS1-C3     | 37 | sS1-C2     | 37 |            |    | 734.2  | sS1-C2     | 39 | sS1-C3     | 39 |            |   |
| 931.9                         | rC2H'      | 45 | rC3H'      | 45 |            |    | 939.7  | rC3H       | 42 | rC2H       | 42 |            |   |
| 943.4                         | rC3H       | 34 | rC2H       | 34 | wSO2       | 16 | 943.0  | rC3H       | 44 | rC2H       | 44 |            |   |
| 986.8                         | rC3H'      | 39 | rC2H'      | 39 |            |    | 947.1  | rC2H'      | 46 | rC3H'      | 46 |            |   |
| 997.9                         | rC2H       | 35 | rC3H       | 35 |            |    | 948.6  | rC2H'      | 44 | rC3H'      | 44 |            |   |
| 1113.4                        | sS1-O11    | 37 | sS1-O12    | 37 |            |    | 1118.8 | sS1-O11    | 42 | sS1-O12    | 42 |            |   |



|        |         |    |         |    |        |         |    |         |    |
|--------|---------|----|---------|----|--------|---------|----|---------|----|
| 1296.1 | sS1-O11 | 45 | sS1-O12 | 45 | 1312.5 | sS1-O12 | 45 | sS1-O11 | 45 |
| 1330.2 | dsC2H   | 49 | dsC3H   | 49 | 1388.9 | dsC3H   | 45 | dsC2H   | 45 |
| 1346.4 | dsC3H   | 49 | dsC2H   | 49 | 1389.9 | dsC3H   | 46 | dsC2H   | 46 |
| 1422.4 | daC3H'  | 48 | daC2H'  | 48 | 1433.9 | daC3H   | 46 | daC2H   | 46 |
| 1426.3 | daC2H   | 47 | daC3H   | 47 | 1436.0 | daC3H   | 46 | daC2H   | 46 |
| 1434.9 | daC3H   | 47 | daC2H   | 47 | 1437.8 | daC3H'  | 47 | daC2H'  | 47 |
| 1438.0 | daC2H'  | 46 | daC3H'  | 46 | 1439.6 | daC2H'  | 47 | daC3H'  | 47 |
| 2950.7 | sC4-H   | 50 | sC3-H   | 50 | 2843.9 | sC4-H   | 50 | sC3-H   | 50 |
| 2952.5 | sC3-H   | 50 | sC4-H   | 50 | 2844.4 | sC4-H   | 50 | sC3-H   | 50 |
| 3058.7 | sC4-H   | 50 | sC3-H   | 50 | 2913.2 | sC4-H   | 50 | sC3-H   | 50 |
| 3059.6 | sC3-H   | 50 | sC4-H   | 50 | 2914.9 | sC3-H   | 50 | sC4-H   | 50 |
| 3062.2 | sC4-H   | 50 | sC3-H   | 50 | 2915.2 | sC4-H   | 50 | sC3-H   | 50 |
| 3065.4 | sC3-H   | 50 | sC4-H   | 50 | 2915.4 | sC3-H   | 50 | sC4-H   | 50 |

**Table S34.** MM and HF/6-31G(d) level interaction energies (kcal/mol) and distances (Å) of EMSN – water complexes.

| Interaction | Orientation | $\Delta E$ (QM) | $\Delta E$ (MM) | Difference | r (QM) | r (MM) | Difference |
|-------------|-------------|-----------------|-----------------|------------|--------|--------|------------|
| O11...HOH   | 180         | -7.32           | -7.66           | -0.34      | 1.99   | 1.78   | -0.21      |
| O11...HOH   | 90          | -5.30           | -5.27           | 0.03       | 2.08   | 1.83   | -0.25      |

**Table S35.** Gas phase dipole moment (Debye) of EMSN calculated at the MP2/6-31G(d) and MM level of theory.

| $\mu$ | QM      | MM      |
|-------|---------|---------|
| X     | -3.3538 | -4.2179 |
| Y     | 3.0097  | 4.3589  |
| Z     | 0.0000  | 0.0000  |
| Total | 4.5062  | 6.0655  |

**Table S36.** MM and MP2/6-31G(d) level equilibrium geometry of EMSN

| Coordinate      | QM    | MM    | Difference | Coordinate | QM    | MM    | Difference |
|-----------------|-------|-------|------------|------------|-------|-------|------------|
| Bond length (Å) |       |       |            | Angles (°) |       |       |            |
| S1-O11          | 1.472 | 1.438 | -0.034     | C2-S1-C3   | 103.8 | 103.6 | -0.2       |
| S1-O12          | 1.472 | 1.438 | -0.034     | O11-S1-C2  | 107.7 | 107.6 | -0.1       |
| S1-C2           | 1.786 | 1.781 | -0.005     | O12-S1-C2  | 107.7 | 107.6 | -0.1       |
| S1-C3           | 1.794 | 1.798 | 0.004      | O11-S1-C3  | 107.8 | 107.7 | -0.1       |

|        |       |       |       |            |       |       |      |
|--------|-------|-------|-------|------------|-------|-------|------|
| C2-C3  | 1.524 | 1.535 | 0.010 | O12-S1-C3  | 107.8 | 107.7 | -0.1 |
| C2-H21 | 1.092 | 1.110 | 0.018 | O11-S1-O12 | 120.8 | 121.3 | 0.5  |
| C2-H22 | 1.091 | 1.109 | 0.018 | S1-C2-H21  | 106.2 | 108.3 | 2.0  |
| C2-H23 | 1.091 | 1.109 | 0.018 | S1-C2-H22  | 109.6 | 109.4 | -0.3 |
| C3-H31 | 1.094 | 1.109 | 0.015 | S1-C2-H23  | 109.6 | 109.4 | -0.3 |
| C3-H32 | 1.094 | 1.109 | 0.015 | H21-C2-H22 | 109.9 | 109.6 | -0.3 |
| C4-H41 | 1.092 | 1.110 | 0.018 | H21-C2-H23 | 109.9 | 109.6 | -0.3 |
| C4-H42 | 1.092 | 1.112 | 0.020 | H22-C2-H23 | 111.4 | 110.5 | -0.8 |
| C4-H43 | 1.092 | 1.112 | 0.020 | S1-C3-H31  | 107.1 | 107.5 | 0.3  |
|        |       |       |       | S1-C3-H32  | 107.1 | 107.5 | 0.3  |
|        |       |       |       | H31-C3-H32 | 109.3 | 110.5 | 1.1  |
|        |       |       |       | S1-C3-C4   | 109.5 | 108.8 | -0.7 |
|        |       |       |       | C4-C3-H31  | 111.8 | 111.2 | -0.5 |
|        |       |       |       | C4-C3-H32  | 111.8 | 111.2 | -0.5 |
|        |       |       |       | C3-C4-H41  | 110.4 | 110.7 | 0.3  |
|        |       |       |       | C3-C4-H42  | 111.8 | 111.2 | -0.5 |
|        |       |       |       | C3-C4-H43  | 111.8 | 111.2 | -0.5 |
|        |       |       |       | H41-C4-H42 | 108.8 | 108.6 | -0.3 |
|        |       |       |       | H41-C4-H43 | 108.8 | 108.6 | -0.3 |
|        |       |       |       | H42-C4-H43 | 108.8 | 108.1 | -0.7 |

  

| Dihedrals (°) |        |        |      |
|---------------|--------|--------|------|
| C2-S1-C3-C4   | -180.0 | -180.0 | 0.0  |
| C3-S1-C2-H22  | -61.3  | -60.6  | 0.7  |
| S1-C3-C4-H42  | 60.2   | 59.7   | -0.4 |

**Table S37.** Scaled MP2/6-31G(d) and MM level vibrational spectra of EMSN.

| QM (scaled by a factor 0.943) |            |    |            |    |            |    | MM    |            |    |            |    |            |   |
|-------------------------------|------------|----|------------|----|------------|----|-------|------------|----|------------|----|------------|---|
| Freq                          | Assignment | %  | Assignment | %  | Assignment | %  | Freq  | Assignment | %  | Assignment | %  | Assignment | % |
| 73.7                          | tS1-C3     | 94 |            |    |            |    | 91.4  | tS1-C3     | 96 |            |    |            |   |
| 187.0                         | cSCC       | 53 | cC3CS      | 40 |            |    | 211.6 | tS1-C2     | 91 |            |    |            |   |
| 197.7                         | tS1-C2     | 89 |            |    |            |    | 220.0 | cC3CS      | 50 | cSCC       | 35 |            |   |
| 209.5                         | tC3-C4     | 73 |            |    |            |    | 232.5 | tC3-C4     | 81 |            |    |            |   |
| 281.8                         | iSO2       | 86 |            |    |            |    | 306.8 | cSCC       | 57 | cC3CS      | 16 |            |   |
| 301.5                         | cSCC       | 34 | cC3CS      | 32 | wSO2       | 16 | 359.1 | iSO2       | 92 |            |    |            |   |
| 355.3                         | rSO2       | 78 |            |    |            |    | 380.7 | rSO2       | 87 |            |    |            |   |
| 454.7                         | cSO2       | 87 |            |    |            |    | 410.6 | wSO2       | 63 | cC3CS      | 18 |            |   |
| 485.6                         | wSO2       | 58 | sS1-C2     | 20 |            |    | 454.3 | cSO2       | 85 |            |    |            |   |
| 659.4                         | sS1-C3     | 64 |            |    |            |    | 650.9 | sS1-C3     | 55 |            |    |            |   |
| 750.8                         | sS1-C2     | 66 |            |    |            |    | 714.9 | sS1-C2     | 65 |            |    |            |   |
| 774.4                         | rC3H       | 56 | rC4H'      | 31 |            |    | 824.0 | rC3H       | 74 | rC4H'      | 17 |            |   |
| 951.2                         | rC2H       | 42 | rC4H       | 25 |            |    | 940.2 | rC2H       | 87 |            |    |            |   |
| 952.9                         | rC2H'      | 80 |            |    |            |    | 948.0 | rC2H'      | 90 |            |    |            |   |

|        |         |     |         |    |       |    |        |         |     |         |    |
|--------|---------|-----|---------|----|-------|----|--------|---------|-----|---------|----|
| 973.7  | sC3-C4  | 39  | rC2H    | 27 |       |    | 983.2  | rC4H    | 40  | sC3-C4  | 36 |
| 1043.2 | iC3H    | 32  | rC4H'   | 27 | rC3H  | 24 | 1030.6 | rC4H'   | 67  |         |    |
| 1050.5 | sC3-C4  | 38  | rC4H    | 36 |       |    | 1044.1 | sC3-C4  | 44  | rC4H    | 43 |
| 1104.2 | sS1-O12 | 36  | sS1-O11 | 36 |       |    | 1116.8 | sS1-O12 | 42  | sS1-O11 | 42 |
| 1231.5 | iC3H    | 46  | rC4H'   | 29 |       |    | 1180.7 | iC3H    | 86  |         |    |
| 1286.0 | wC3H    | 79  |         |    |       |    | 1314.5 | sS1-O11 | 45  | sS1-O12 | 45 |
| 1291.9 | sS1-O11 | 39  | sS1-O12 | 39 |       |    | 1319.6 | wC3H    | 80  |         |    |
| 1335.6 | dsC2H   | 98  |         |    |       |    | 1389.6 | dsC2H   | 91  |         |    |
| 1383.6 | dsC4H   | 96  |         |    |       |    | 1416.4 | dsC4H   | 62  | daC4H   | 29 |
| 1428.4 | daC2H   | 70  | cC3H    | 25 |       |    | 1426.9 | daC4H   | 59  | dsC4H   | 33 |
| 1429.9 | daC2H'  | 93  |         |    |       |    | 1432.3 | daC4H'  | 90  |         |    |
| 1434.4 | cC3H    | 75  | daC2H   | 24 |       |    | 1434.0 | daC2H   | 91  |         |    |
| 1466.5 | daC4H'  | 91  |         |    |       |    | 1438.0 | daC2H'  | 94  |         |    |
| 1481.4 | daC4H   | 92  |         |    |       |    | 1457.9 | cC3H    | 91  |         |    |
| 2949.1 | sC4-H   | 53  | sC3-H   | 29 | sC2-H | 18 | 2844.2 | sC2-H   | 100 |         |    |
| 2949.5 | sC2-H   | 43  | sC4-H   | 43 |       |    | 2850.1 | sC3-H   | 98  |         |    |
| 2952.5 | sC3-H   | 57  | sC2-H   | 39 |       |    | 2892.2 | sC3-H   | 99  |         |    |
| 3014.6 | sC3-H   | 95  |         |    |       |    | 2903.1 | sC4-H   | 99  |         |    |
| 3037.1 | sC4-H   | 100 |         |    |       |    | 2914.1 | sC2-H   | 100 |         |    |
| 3047.3 | sC4-H   | 95  |         |    |       |    | 2915.2 | sC2-H   | 100 |         |    |
| 3058.1 | sC2-H   | 100 |         |    |       |    | 2959.0 | sC4-H   | 100 |         |    |
| 3063.4 | sC2-H   | 100 |         |    |       |    | 2960.1 | sC4-H   | 99  |         |    |

**Table S38.** MM and HF/6-31G(d) level interaction energies (kcal/mol) and distances (Å) of MMST – water complexes.

| Interaction | Orientation | $\Delta E$ (QM) | $\Delta E$ (MM) | Difference | r (QM) | r (MM) | Difference |
|-------------|-------------|-----------------|-----------------|------------|--------|--------|------------|
| O11...HOH   | 180         | -4.79           | -4.73           | 0.06       | 2.11   | 1.86   | -0.25      |
| O12...HOH   | 90          | -4.70           | -4.81           | -0.10      | 2.12   | 1.85   | -0.27      |
| O3...HOH    | 0           | -2.40           | -2.16           | 0.23       | 2.15   | 1.89   | -0.26      |
| O3...HOH    | 90          | -2.81           | -2.99           | -0.18      | 2.12   | 1.85   | -0.27      |

**Table S39.** Gas phase dipole moment (Debye) of MMST calculated at the MP2/6-31G(d) and MM level of theory.

| $\mu$ | QM     | MM     |
|-------|--------|--------|
| X     | 0.9540 | 1.2846 |
| Y     | 1.6462 | 2.1155 |
| Z     | 2.1677 | 2.6453 |
| Total | 2.8843 | 3.6226 |

**Table S40.** MM and MP2/6-31G(d) level equilibrium geometry of MMST

| Coordinate      | QM     | MM     | Difference | Coordinate | QM    | MM    | Difference |
|-----------------|--------|--------|------------|------------|-------|-------|------------|
| Bond length (Å) |        |        |            | Angles (°) |       |       |            |
| S1-C2           | 1.771  | 1.778  | 0.007      | C2-S1-O3   | 96.1  | 96.7  | 0.6        |
| S1-O11          | 1.461  | 1.438  | -0.023     | O11-S1-C2  | 110.0 | 108.8 | -1.2       |
| S1-O12          | 1.461  | 1.438  | -0.023     | O12-S1-C2  | 110.0 | 108.8 | -1.2       |
| S1-O3           | 1.638  | 1.601  | -0.037     | O11-S1-O3  | 109.1 | 109.1 | 0.0        |
| O3-C4           | 1.453  | 1.436  | -0.017     | O12-S1-O3  | 109.1 | 109.1 | 0.0        |
| C2-H21          | 1.091  | 1.109  | 0.018      | O11-S1-O12 | 120.0 | 121.6 | 1.6        |
| C2-H22          | 1.089  | 1.109  | 0.019      | S1-O3-C4   | 113.1 | 114.0 | 0.9        |
| C2-H23          | 1.089  | 1.109  | 0.019      | S1-C2-H21  | 106.8 | 108.6 | 1.8        |
| C4-H41          | 1.088  | 1.110  | 0.023      | S1-C2-H22  | 108.8 | 108.9 | 0.1        |
| C4-H42          | 1.091  | 1.113  | 0.021      | S1-C2-H23  | 108.8 | 108.9 | 0.1        |
| C4-H43          | 1.091  | 1.113  | 0.021      | H21-C2-H22 | 110.5 | 110.0 | -0.5       |
| Dihedrals (°)   |        |        |            | H21-C2-H23 | 110.5 | 110.0 | -0.5       |
| C2-S1-O3-C4     | -180.0 | -180.0 | 0.0        | H22-C2-H23 | 111.2 | 110.2 | -1.0       |
| H22-C2-S1-O3    | 60.7   | 60.1   | -0.6       | O3-C4-H41  | 104.7 | 109.7 | 5.0        |
| H42-C4-O3-S1    | 61.1   | 60.4   | -0.8       | O3-C4-H42  | 110.0 | 110.5 | 0.6        |
|                 |        |        |            | O3-C4-H43  | 110.0 | 110.5 | 0.6        |
|                 |        |        |            | H41-C4-H42 | 110.8 | 108.5 | -2.3       |
|                 |        |        |            | H41-C4-H43 | 110.6 | 108.5 | -2.1       |
|                 |        |        |            | H42-C4-H43 | 110.6 | 109.0 | -1.7       |

**Table S41.** Scaled MP2/6-31G(d) and MM level vibrational spectra of MMST.

| QM (scaled by a factor 0.943) |            |    |            |    |            |    | MM    |            |    |            |    |            |    |
|-------------------------------|------------|----|------------|----|------------|----|-------|------------|----|------------|----|------------|----|
| Freq                          | Assignment | %  | Assignment | %  | Assignment | %  | Freq  | Assignment | %  | Assignment | %  | Assignment | %  |
| 35.1                          | tS1-O3     | 93 |            |    |            |    | 73.9  | tS1-O3     | 85 |            |    |            |    |
| 140.0                         | tO3-C4     | 93 |            |    |            |    | 146.2 | tO3-C4     | 84 |            |    |            |    |
| 201.9                         | tS1-C2     | 99 |            |    |            |    | 195.0 | tS1-C2     | 98 |            |    |            |    |
| 207.2                         | iO3        | 47 | cSOC       | 47 |            |    | 231.4 | iO3        | 52 | cSOC       | 34 |            |    |
| 284.8                         | iSO2       | 81 |            |    |            |    | 324.5 | cSOC       | 51 | wSO2       | 26 |            |    |
| 317.8                         | cSOC       | 37 | iO3        | 29 | wSO2       | 23 | 366.9 | iSO2       | 78 | rSO2       | 20 |            |    |
| 430.7                         | rSO2       | 77 |            |    |            |    | 427.5 | wSO2       | 41 | iO3        | 19 | sS1-C2     | 19 |
| 464.8                         | cSO2       | 84 |            |    |            |    | 449.0 | rSO2       | 72 | iSO2       | 21 |            |    |
| 511.3                         | wSO2       | 47 | sS1-C2     | 23 | iO3        | 16 | 468.9 | cSO2       | 74 |            |    |            |    |
| 675.5                         | sS1-O3     | 72 |            |    |            |    | 686.9 | sS1-O3     | 38 | sS1-C2     | 24 |            |    |

|        |         |    |         |    |         |    |        |         |    |         |    |         |    |
|--------|---------|----|---------|----|---------|----|--------|---------|----|---------|----|---------|----|
| 782.0  | sS1-C2  | 64 |         |    |         |    | 723.0  | sS1-C2  | 48 | sS1-O3  | 29 |         |    |
| 970.2  | rC2     | 43 | sO3-C4  | 41 |         |    | 944.0  | rC2'    | 90 |         |    |         |    |
| 978.8  | rC2'    | 84 |         |    |         |    | 945.3  | rC2     | 86 |         |    |         |    |
| 998.4  | sO3-C4  | 49 | rC2     | 35 |         |    | 1026.5 | sO3-C4  | 77 |         |    |         |    |
| 1127.1 | sS1-O12 | 38 | sS1-O11 | 38 |         |    | 1113.3 | sS1-O11 | 33 | sS1-O12 | 33 | rC4     | 20 |
| 1133.1 | rC4'    | 95 |         |    |         |    | 1128.0 | rC4'    | 76 | daC4H3' | 23 |         |    |
| 1152.8 | rC4     | 79 |         |    |         |    | 1150.2 | rC4     | 57 |         |    |         |    |
| 1310.7 | sS1-O11 | 46 | sS1-O12 | 46 |         |    | 1312.6 | sS1-O12 | 46 | sS1-O11 | 46 |         |    |
| 1348.4 | dsC2H3  | 98 |         |    |         |    | 1384.5 | dsC2H3  | 93 |         |    |         |    |
| 1423.6 | dsC4H3  | 97 |         |    |         |    | 1432.8 | daC4H3  | 82 | rC4     | 18 |         |    |
| 1428.5 | daC2H3' | 93 |         |    |         |    | 1434.1 | daC2H3  | 94 |         |    |         |    |
| 1433.9 | daC2H3  | 90 |         |    |         |    | 1436.1 | daC2H3' | 93 |         |    |         |    |
| 1461.7 | daC4H3' | 95 |         |    |         |    | 1458.8 | daC4H3' | 76 | rC4'    | 24 |         |    |
| 1479.1 | daC4H3  | 94 |         |    |         |    | 1594.6 | dsC4H3  | 88 |         |    |         |    |
| 2950.5 | sC4-H42 | 40 | sC4-H43 | 40 | sC4-H41 | 19 | 2844.1 | sC2-H22 | 33 | sC2-H23 | 33 | sC2-H21 | 33 |
| 2964.3 | sC2-H21 | 39 | sC2-H23 | 30 | sC2-H22 | 30 | 2851.5 | sC4-H41 | 35 | sC4-H43 | 32 | sC4-H42 | 32 |
| 3046.3 | sC4-H43 | 50 | sC4-H42 | 50 |         |    | 2913.2 | sC4-H41 | 64 | sC4-H43 | 18 | sC4-H42 | 18 |
| 3070.8 | sC2-H21 | 61 | sC2-H22 | 20 | sC2-H23 | 20 | 2914.9 | sC2-H21 | 66 | sC2-H22 | 17 | sC2-H23 | 17 |
| 3077.0 | sC4-H41 | 81 |         |    |         |    | 2915.6 | sC4-H42 | 41 | sC4-H43 | 41 |         |    |
| 3082.8 | sC2-H23 | 50 | sC2-H22 | 50 |         |    | 2915.6 | sC2-H23 | 41 | sC2-H22 | 41 |         |    |

**Table S42.** MM and HF/6-31G(d) level interaction energies (kcal/mol) and distances (Å) of PMST – water complexes.

| Interaction | Orientation | $\Delta E$ (QM) | $\Delta E$ (MM) | Difference | r (QM) | r (MM) | Difference |
|-------------|-------------|-----------------|-----------------|------------|--------|--------|------------|
| O11...HOH   | 180         | -4.64           | -4.76           | -0.12      | 2.12   | 1.87   | -0.25      |
| O11...HOH   | 90          | -4.96           | -5.19           | -0.23      | 2.11   | 1.84   | -0.27      |
| O3...HOH    | 0           | -2.46           | -2.10           | 0.36       | 2.19   | 1.95   | -0.24      |
| O3...HOH    | 90          | -2.69           | -2.70           | -0.01      | 2.15   | 1.87   | -0.28      |

**Table S43.** Gas phase dipole moment (Debye) of PMST calculated at the MP2/6-31G(d) and MM level of theory.

| $\mu$ | QM      | MM      |
|-------|---------|---------|
| X     | -1.6853 | -2.0895 |
| Y     | 1.8837  | 2.9529  |
| Z     | -0.0099 | 0.0000  |
| Total | 2.5276  | 3.6174  |

**Table S44.** MM and MP2/6-31G(d) level equilibrium geometry of PMST

| Coordinate      | QM     | MM     | Difference | Coordinate  | QM    | MM    | Difference |
|-----------------|--------|--------|------------|-------------|-------|-------|------------|
| Bond length (Å) |        |        |            | Angles (°)  |       |       |            |
| S1-C2           | 1.772  | 1.778  | 0.006      | C2-S1-O3    | 95.4  | 96.3  | 0.9        |
| S1-O11          | 1.459  | 1.438  | -0.021     | O11-S1-C2   | 110.0 | 108.1 | -1.9       |
| S1-O12          | 1.459  | 1.438  | -0.021     | O12-S1-C2   | 110.0 | 108.1 | -1.9       |
| S1-O3           | 1.663  | 1.607  | -0.056     | O11-S1-O3   | 108.9 | 109.8 | 0.9        |
| O3-CZ           | 1.413  | 1.388  | -0.024     | O12-S1-O3   | 108.9 | 109.8 | 0.9        |
| C2-H21          | 1.091  | 1.109  | 0.018      | O11-S1-O12  | 120.6 | 121.7 | 1.1        |
| C2-H22          | 1.089  | 1.109  | 0.019      | S1-O3-CZ    | 113.5 | 113.2 | -0.2       |
| C2-H23          | 1.089  | 1.109  | 0.019      | S1-C2-H21   | 106.9 | 108.6 | 1.8        |
| CZ-CE1          | 1.393  | 1.404  | 0.012      | S1-C2-H22   | 108.7 | 109.0 | 0.2        |
| CZ-CE2          | 1.393  | 1.404  | 0.012      | S1-C2-H23   | 108.7 | 109.0 | 0.2        |
| CE1-CD1         | 1.396  | 1.402  | 0.006      | H21-C2-H22  | 110.6 | 110.0 | -0.6       |
| CE2-CD2         | 1.396  | 1.402  | 0.006      | H21-C2-H23  | 110.6 | 110.0 | -0.6       |
| CG-CD1          | 1.397  | 1.402  | 0.004      | H22-C2-H23  | 111.2 | 110.2 | -1.0       |
| CG-CD2          | 1.397  | 1.402  | 0.004      | O3-CZ-CE1   | 118.7 | 120.2 | 1.5        |
| CE1-HE1         | 1.086  | 1.079  | -0.006     | O3-CZ-CE2   | 118.8 | 120.2 | 1.4        |
| CE2-HE2         | 1.086  | 1.079  | -0.006     | CE1-CZ-CE2  | 122.5 | 119.5 | -3.0       |
| CD1-HD1         | 1.087  | 1.081  | -0.006     | CZ-CE1-CD1  | 118.4 | 120.3 | 2.0        |
| CD2-HD2         | 1.087  | 1.081  | -0.006     | CZ-CE2-CD2  | 118.4 | 120.3 | 2.0        |
| CG-HG           | 1.087  | 1.081  | -0.006     | CG-CD1-CE1  | 120.3 | 119.8 | -0.5       |
|                 |        |        |            | CG-CD2-CE2  | 120.3 | 119.8 | -0.5       |
|                 |        |        |            | CD1-CG-CD2  | 120.1 | 120.2 | 0.1        |
|                 |        |        |            | CZ-CE1-HE1  | 119.7 | 119.1 | -0.5       |
|                 |        |        |            | CZ-CE2-HE2  | 119.7 | 119.1 | -0.5       |
|                 |        |        |            | CD1-CE1-HE1 | 122.0 | 120.5 | -1.5       |
|                 |        |        |            | CD2-CE2-HE2 | 122.0 | 120.5 | -1.5       |
|                 |        |        |            | CE1-CD1-HD1 | 119.5 | 120.1 | 0.6        |
|                 |        |        |            | CE2-CD2-HD2 | 119.5 | 120.1 | 0.6        |
|                 |        |        |            | CG-CD1-HD1  | 120.1 | 120.1 | 0.0        |
|                 |        |        |            | CG-CD2-HD2  | 120.1 | 120.1 | 0.0        |
|                 |        |        |            | CD1-CG-HG   | 119.9 | 119.9 | 0.0        |
|                 |        |        |            | CD2-CG-HG   | 119.9 | 119.9 | 0.0        |
| Dihedrals (°)   |        |        |            |             |       |       |            |
| C2-S1-O3-CZ     | -179.9 | -180.0 | -0.1       |             |       |       |            |
| O3-S1-C2-H22    | -60.6  | -60.2  | 0.5        |             |       |       |            |
| S1-O3-CZ-CE1    | 91.3   | 92.2   | 0.9        |             |       |       |            |
| O3-CZ-CE1-CD1   | 177.0  | 177.1  | 0.1        |             |       |       |            |
| CZ-CE1-CD1-CG   | 0.3    | -0.8   | -1.1       |             |       |       |            |
| CE1-CD1-CG-CD2  | 0.0    | 0.0    | 0.0        |             |       |       |            |
| O3-CZ-CE2-CD2   | -177.0 | -177.1 | -0.1       |             |       |       |            |
| CZ-CE2-CD2-CG   | -0.3   | 0.8    | 1.1        |             |       |       |            |
| CE2-CD2-CG-CD1  | 0.0    | 0.0    | 0.0        |             |       |       |            |

**Table S45.** Scaled MP2/6-31G(d) and MM level vibrational spectra of PMST.

| QM (scaled by a factor 0.943) |            |    |            |    |            |    | MM     |            |     |            |    |            |    |
|-------------------------------|------------|----|------------|----|------------|----|--------|------------|-----|------------|----|------------|----|
| Freq                          | Assignment | %  | Assignment | %  | Assignment | %  | Freq   | Assignment | %   | Assignment | %  | Assignment | %  |
| 12.3                          | tO3-CZ     | 51 | tS1-O3     | 47 |            |    | 18.4   | tO3-CZ     | 68  | tS1-O3     | 30 |            |    |
| 53.4                          | tS1-O3     | 51 | tO3-CZ     | 50 |            |    | 62.2   | tS1-O3     | 67  | tO3-CZ     | 35 |            |    |
| 81.9                          | iO3        | 48 | wCZH       | 41 |            |    | 89.9   | wCZH       | 52  | iO3        | 37 |            |    |
| 198.8                         | tS1-C2     | 99 |            |    |            |    | 194.3  | tS1-C2     | 99  |            |    |            |    |
| 216.6                         | cSOC       | 32 | ta6RNG1a   | 31 |            |    | 237.1  | iO3        | 35  | ta6RNG1a   | 24 |            |    |
| 241.2                         | cSOC       | 44 |            |    |            |    | 252.5  | cSOC       | 71  |            |    |            |    |
| 251.1                         | iSO2       | 74 | dCZH       | 22 |            |    | 326.3  | iSO2       | 48  | dCZH       | 34 |            |    |
| 331.9                         | rSO2       | 47 | dCZH       | 31 |            |    | 377.8  | rSO2       | 55  | iSO2       | 31 |            |    |
| 382.0                         | ta6RNG1    | 87 | ta6RNG1a   | 29 |            |    | 398.3  | wSO2       | 72  |            |    |            |    |
| 423.6                         | ta6RNG1a   | 32 | cSO2       | 18 |            |    | 415.0  | ta6RNG1    | 89  | ta6RNG1a   | 30 |            |    |
| 450.1                         | wSO2       | 37 | cSO2       | 20 |            |    | 449.6  | ta6RNG1a   | 39  | cSO2       | 31 |            |    |
| 462.7                         | rSO2       | 43 | dCZH       | 30 |            |    | 486.3  | cSO2       | 51  |            |    |            |    |
| 463.4                         | tp6RNG1    | 81 |            |    |            |    | 525.7  | dCZH       | 34  | rSO2       | 34 | iSO2       | 21 |
| 490.8                         | cSO2       | 47 |            |    |            |    | 576.6  | da6RNG1a   | 27  |            |    |            |    |
| 578.6                         | da6RNG1a   | 20 | iO3        | 20 |            |    | 646.1  | tp6RNG1    | 103 |            |    |            |    |
| 593.1                         | da6RNG1    | 61 | da6RNG1a   | 20 |            |    | 677.8  | da6RNG1    | 62  | da6RNG1a   | 21 |            |    |
| 657.2                         | sS1-O3     | 46 |            |    |            |    | 695.6  | sS1-C2     | 51  |            |    |            |    |
| 713.7                         | wCGH       | 24 | wCZH       | 16 |            |    | 738.0  | sS1-O3     | 24  | sS1-C2     | 15 |            |    |
| 762.1                         | sS1-C2     | 61 |            |    |            |    | 763.7  | wCGH       | 22  |            |    |            |    |
| 763.7                         | wCE1H      | 40 | wCE2H      | 40 |            |    | 809.5  | sS1-O3     | 20  | dt6RNG1    | 18 |            |    |
| 807.1                         | wCE1H      | 29 | wCE2H      | 29 | wCGH       | 17 | 854.0  | wCE1H      | 25  | wCE2H      | 25 | wCD2H      | 25 |
|                               |            |    |            |    |            |    |        | wCD1H      | 25  |            |    |            |    |
| 819.7                         | sCZ-O3     | 20 | sS1-O3     | 16 |            |    | 924.4  | wCE1H      | 40  | wCE2H      | 40 | wCGH       | 27 |
| 840.8                         | wCD1H      | 44 | wCD2H      | 44 |            |    | 944.7  | rC2H'      | 90  |            |    |            |    |
| 844.2                         | wCGH       | 52 | wCD2H      | 28 | wCD1H      | 27 | 946.0  | rC2H       | 84  |            |    |            |    |
| 966.9                         | dt6RNG1    | 64 |            |    |            |    | 951.3  | dt6RNG1    | 47  |            |    |            |    |
| 978.0                         | rC2H'      | 84 |            |    |            |    | 978.8  | sCG-CD2    | 30  | sCD1-CG    | 30 |            |    |
| 981.8                         | rC2H       | 70 |            |    |            |    | 995.6  | wCD1H      | 30  | wCD2H      | 30 | wCE2H      | 29 |
|                               |            |    |            |    |            |    |        | wCE1H      | 29  |            |    |            |    |
| 1001.8                        | sCD1-CG    | 26 | sCG-CD2    | 26 |            |    | 1006.4 | wCGH       | 51  | wCD2H      | 31 | wCD1H      | 31 |
|                               |            |    |            |    |            |    |        | tp6RNG1    | -18 |            |    |            |    |
| 1054.7                        | sCE1-CD1   | 19 | sCD2-CE2   | 19 |            |    | 1030.9 | sCD2-CE2   | 23  | sCE1-CD1   | 23 |            |    |
| 1120.7                        | sS1-O12    | 29 | sS1-O11    | 29 |            |    | 1123.0 | sS1-O12    | 41  | sS1-O11    | 41 |            |    |
| 1143.4                        | dCE1H      | 19 | dCE2H      | 19 |            |    | 1157.0 | sCE1-CD1   | 21  | sCD2-CE2   | 21 |            |    |
| 1146.0                        | dCGH       | 42 | dCD2H      | 19 | dCD1H      | 19 | 1214.9 | dCGH       | 25  | dCD2H      | 19 | dCD1H      | 19 |
| 1169.5                        | sCZ-O3     | 30 |            |    |            |    | 1267.7 | sCZ-O3     | 37  | dCE1H      | 19 | dCE2H      | 19 |
| 1275.1                        | dCE2H      | 26 | dCE1H      | 26 |            |    | 1313.2 | sS1-O11    | 46  | sS1-O12    | 46 |            |    |
| 1319.0                        | sS1-O11    | 46 | sS1-O12    | 46 |            |    | 1359.2 | dCE2H      | 29  | dCE1H      | 29 |            |    |
| 1345.9                        | dsC2H3     | 98 |            |    |            |    | 1385.3 | dsC2H3     | 93  |            |    |            |    |
| 1388.0                        | sCE2-CZ    | 17 | sCZ-CE1    | 17 | sCD1-CG    | 16 | 1427.2 | dCGH       | 25  | sCZ-CE1    | 20 | sCE2-CZ    | 20 |
|                               | sCG-CD2    | 16 |            |    |            |    |        |            |     |            |    |            |    |
| 1424.5                        | dCGH       | 30 |            |    |            |    | 1434.2 | daC2H3     | 94  |            |    |            |    |

|        |          |     |          |    |          |        |          |          |          |          |          |          |    |  |
|--------|----------|-----|----------|----|----------|--------|----------|----------|----------|----------|----------|----------|----|--|
| 1427.5 | daC2H3'  | 92  |          |    |          | 1436.2 | daC2H3'  | 93       |          |          |          |          |    |  |
| 1432.4 | daC2H3   | 93  |          |    |          | 1437.9 | dCD2H    | 20       | dCD1H    | 20       | sCE1-CD1 | 17       |    |  |
|        |          |     |          |    |          |        | sCD2-CE2 | 17       |          |          |          |          |    |  |
| 1457.1 | dCD1H    | 16  | dCD2H    | 16 |          | 1467.4 | dCD1H    | 30       | dCD2H    | 30       |          |          |    |  |
| 1569.9 | sCD2-CE2 | 23  | sCE1-CD1 | 23 |          | 1486.3 | dCGH     | 23       |          |          |          |          |    |  |
| 1576.0 | sCZ-CE1  | 20  | sCE2-CZ  | 20 | sCG-CD2  | 18     | 1542.1   | dCE2H    | 16       | dCE1H    | 16       |          |    |  |
|        | sCD1-CG  | 17  |          |    |          |        |          |          |          |          |          |          |    |  |
| 2963.2 | sC2-H    | 100 |          |    |          | 2844.2 | sC2-H    | 100      |          |          |          |          |    |  |
| 3046.1 | sCG-HG   | 43  | sCD1-HD1 | 27 | sCD2-HD2 | 27     | 2915.0   | sC2-H    | 100      |          |          |          |    |  |
| 3055.6 | sCD2-HD2 | 46  | sCD1-HD1 | 46 |          |        | 2915.6   | sC2-H    | 100      |          |          |          |    |  |
| 3065.4 | sCG-HG   | 54  | sCD2-HD2 | 17 | sCD1-HD1 | 17     | 3054.7   | sCD1-HD1 | 28       | sCD2-HD2 | 28       | sCE1-HE1 | 22 |  |
|        |          |     |          |    |          |        |          | sCE2-HE2 | 22       |          |          |          |    |  |
| 3070.2 | sC2-H    | 100 |          |    |          | 3055.2 | sCG-HG   | 71       |          |          |          |          |    |  |
| 3078.4 | sCE1-HE1 | 52  | sCE2-HE2 | 41 |          | 3056.8 | sCE1-HE1 | 28       | sCE2-HE2 | 28       | sCD1-HD1 | 22       |    |  |
|        |          |     |          |    |          |        |          | sCD2-HD2 | 22       |          |          |          |    |  |
| 3079.0 | sCE2-HE2 | 48  | sCE1-HE1 | 37 |          | 3057.0 | sCD2-HD2 | 33       | sCD1-HD1 | 33       | sCG-HG   | 16       |    |  |
| 3082.5 | sC2-H    | 100 |          |    |          | 3060.2 | sCE2-HE2 | 28       | sCE1-HE1 | 28       | sCD2-HD2 | 15       |    |  |
|        |          |     |          |    |          |        |          | sCD1-HD1 | 15       |          |          |          |    |  |

**Table S46.** MM and HF/6-31G(d) level interaction energies (kcal/mol) and distances (Å) of MSNA – water complexes.

| Interaction | Orientation | $\Delta E$ (QM) | $\Delta E$ (MM) | Difference | r (QM) | r (MM) | Difference |
|-------------|-------------|-----------------|-----------------|------------|--------|--------|------------|
| O11...HOH   | 180         | -11.86          | -11.66          | 0.20       | 1.90   | 1.73   | -0.17      |

**Table S47.** Gas phase dipole moment (Debye) of MSNA calculated at the MP2/6-31G(d) and MM level of theory.

| $\mu$ | QM     | MM     |
|-------|--------|--------|
| X     | 3.5340 | 3.1044 |
| Y     | 0.0000 | 0.0000 |
| Z     | 0.0000 | 0.0000 |
| Total | 3.5340 | 3.1044 |

**Table S48.** MM and MP2/6-31G(d) level equilibrium geometry of MSNA

| Coordinate      | QM    | MM    | Difference | Coordinate | QM    | MM    | Difference |
|-----------------|-------|-------|------------|------------|-------|-------|------------|
| Bond length (Å) |       |       |            | Angles (°) |       |       |            |
| S1-O11          | 1.488 | 1.447 | -0.041     | O11-S1-C2  | 104.0 | 103.8 | -0.2       |



|               |        |        |        |            |       |       |      |
|---------------|--------|--------|--------|------------|-------|-------|------|
| S1-O12        | 1.488  | 1.447  | -0.041 | O12-S1-C2  | 104.0 | 103.8 | -0.2 |
| S1-O13        | 1.488  | 1.447  | -0.041 | O13-S1-C2  | 104.0 | 103.8 | -0.2 |
| S1-C2         | 1.804  | 1.804  | -0.001 | O11-S1-O12 | 114.4 | 114.5 | 0.1  |
| C2-H21        | 1.092  | 1.106  | 0.015  | O11-S1-O13 | 114.4 | 114.5 | 0.1  |
| C2-H22        | 1.092  | 1.106  | 0.015  | O12-S1-O13 | 114.4 | 114.5 | 0.1  |
| C2-H23        | 1.092  | 1.106  | 0.015  | S1-C2-H21  | 109.1 | 109.1 | 0.0  |
|               |        |        |        | S1-C2-H22  | 109.1 | 109.1 | 0.0  |
|               |        |        |        | S1-C2-H23  | 109.1 | 109.1 | 0.0  |
| Dihedrals (°) |        |        |        | H21-C2-H22 | 109.8 | 109.8 | 0.0  |
| O11-S1-C2-H21 | -180.0 | -180.0 | 0.0    | H21-C2-H23 | 109.8 | 109.8 | 0.0  |
|               |        |        |        | H22-C2-H23 | 109.8 | 109.8 | 0.0  |

**Table S49.** Scaled MP2/6-31G(d) and MM level vibrational spectra of MSNA.

| QM (scaled by a factor 0.943) |            |     |            |    | MM     |            |     |            |    |
|-------------------------------|------------|-----|------------|----|--------|------------|-----|------------|----|
| Freq                          | Assignment | %   | Assignment | %  | Freq   | Assignment | %   | Assignment | %  |
| 253.0                         | tS1-C2     | 100 |            |    | 267.5  | tS1-C2     | 100 |            |    |
| 300.4                         | rS1O       | 60  | rS1O'      | 26 | 359.6  | rS1O       | 88  |            |    |
| 300.4                         | rS1O'      | 60  | rS1O       | 26 | 359.6  | rS1O'      | 88  |            |    |
| 485.3                         | daS1O'     | 89  |            |    | 409.1  | dsS1O      | 80  | sS1-C2     | 19 |
| 485.3                         | daS1O      | 89  |            |    | 616.7  | daS1O'     | 80  |            |    |
| 513.9                         | dsS1O      | 69  | sS1-C2     | 30 | 616.7  | daS1O      | 80  |            |    |
| 730.8                         | sS1-C2     | 66  | dsS1O      | 26 | 689.1  | sS1-C2     | 72  | dsS1O      | 20 |
| 944.8                         | rC2H       | 74  |            |    | 905.2  | rC2H       | 56  | rC2H'      | 34 |
| 944.8                         | rC2H'      | 74  |            |    | 905.2  | rC2H'      | 56  | rC2H       | 34 |
| 986.1                         | sS1-O      | 91  |            |    | 1013.9 | sS1-O      | 97  |            |    |
| 1195.4                        | sS1-O      | 89  |            |    | 1221.3 | sS1-O      | 90  |            |    |
| 1195.4                        | sS1-O      | 89  |            |    | 1221.3 | sS1-O      | 90  |            |    |
| 1317.1                        | dsC2H      | 98  |            |    | 1360.2 | dsC2H      | 94  |            |    |
| 1447.1                        | daC2H      | 72  | daC2H'     | 24 | 1443.1 | daC2H'     | 86  |            |    |
| 1447.1                        | daC2H'     | 72  | daC2H      | 24 | 1443.1 | daC2H      | 86  |            |    |
| 2939.3                        | sC2-H      | 100 |            |    | 2845.9 | sC2-H      | 100 |            |    |
| 3040.9                        | sC2-H      | 100 |            |    | 2914.6 | sC2-H      | 100 |            |    |
| 3040.9                        | sC2-H      | 100 |            |    | 2914.6 | sC2-H      | 100 |            |    |

**Table S50.** MM and HF/6-31G(d) level interaction energies (kcal/mol) and distances (Å) of ESNA – water complexes.

| Interaction | Orientation | $\Delta E$ (QM) | $\Delta E$ (MM) | Difference | r (QM) | r (MM) | Difference |
|-------------|-------------|-----------------|-----------------|------------|--------|--------|------------|
| O11...HOH   | 180         | -11.73          | -11.65          | 0.08       | 1.90   | 1.73   | -0.17      |

**Table S51.** Gas phase dipole moment (Debye) of ESNA calculated at the MP2/6-31G(d) and MM level of theory.

| $\mu$ | QM      | MM      |
|-------|---------|---------|
| X     | -4.3135 | -4.4230 |
| Y     | -1.6972 | -1.4640 |
| Z     | -0.0001 | 0.2289  |
| Total | 4.6354  | 4.6646  |

**Table S52.** MM and MP2/6-31G(d) level equilibrium geometry of ESNA

| Coordinate      | QM    | MM    | Difference | Coordinate | QM    | MM    | Difference |
|-----------------|-------|-------|------------|------------|-------|-------|------------|
| Bond length (Å) |       |       |            | Angles (°) |       |       |            |
| S1-O11          | 1.488 | 1.449 | -0.040     | O11-S1-C2  | 103.9 | 103.4 | -0.4       |
| S1-O12          | 1.491 | 1.449 | -0.042     | O12-S1-C2  | 104.0 | 104.4 | 0.4        |
| S1-O13          | 1.491 | 1.449 | -0.042     | O13-S1-C2  | 104.0 | 104.4 | 0.4        |
| S1-C2           | 1.809 | 1.811 | 0.002      | O11-S1-O12 | 114.4 | 114.2 | -0.3       |
| C2-H21          | 1.094 | 1.107 | 0.013      | O11-S1-O13 | 114.4 | 114.2 | -0.3       |
| C2-H22          | 1.094 | 1.107 | 0.013      | O12-S1-O13 | 114.2 | 114.5 | 0.3        |
| C2-C3           | 1.521 | 1.545 | 0.025      | S1-C2-H21  | 106.7 | 106.9 | 0.2        |
| C3-H31          | 1.092 | 1.112 | 0.019      | S1-C2-H22  | 106.7 | 106.9 | 0.2        |
| C3-H32          | 1.092 | 1.112 | 0.019      | S1-C2-C3   | 111.9 | 112.0 | 0.2        |
| C3-H33          | 1.097 | 1.109 | 0.012      | C3-C2-H21  | 111.5 | 110.7 | -0.8       |
|                 |       |       |            | C3-C2-H22  | 111.5 | 110.7 | -0.8       |
|                 |       |       |            | H21-C2-H22 | 108.2 | 109.3 | 1.1        |
|                 |       |       |            | C2-C3-H31  | 109.5 | 110.2 | 0.7        |
|                 |       |       |            | C2-C3-H32  | 109.5 | 110.2 | 0.7        |
|                 |       |       |            | C2-C3-H33  | 111.6 | 110.5 | -1.1       |
|                 |       |       |            | H31-C3-H32 | 108.1 | 108.2 | 0.1        |
|                 |       |       |            | H31-C3-H33 | 109.0 | 108.8 | -0.2       |
|                 |       |       |            | H32-C3-H33 | 109.0 | 108.8 | -0.2       |
|                 |       |       |            | O11-S1-C2  | 103.9 | 103.4 | -0.4       |
|                 |       |       |            | O12-S1-C2  | 104.0 | 104.4 | 0.4        |
|                 |       |       |            | O13-S1-C2  | 104.0 | 104.4 | 0.4        |
|                 |       |       |            |            |       |       |            |
| Dihedrals (°)   |       |       |            |            |       |       |            |
| O12-S1-C2-C3    | 59.9  | 60.2  | 0.3        |            |       |       |            |
| S1-C2-C3-H32    | -59.2 | -59.7 | -0.5       |            |       |       |            |

**Table S53.** Scaled MP2/6-31G(d) and MM level vibrational spectra of ESNA.

| QM (scaled by a factor 0.943) |            |    |            |    |            |    | MM     |            |     |            |    |            |    |
|-------------------------------|------------|----|------------|----|------------|----|--------|------------|-----|------------|----|------------|----|
| Freq                          | Assignment | %  | Assignment | %  | Assignment | %  | Freq   | Assignment | %   | Assignment | %  | Assignment | %  |
| 103.2                         | tS1-C2     | 93 |            |    |            |    | 113.2  | tS1-C2     | 94  |            |    |            |    |
| 207.4                         | dC2CS      | 50 | rS1O'      | 35 |            |    | 240.3  | dC2CS      | 50  | rS1O       | 41 |            |    |
| 216.9                         | tC2-C3     | 77 |            |    |            |    | 241.8  | tC2-C3     | 84  |            |    |            |    |
| 316.3                         | rS1O       | 53 | rS1O'      | 18 |            |    | 347.3  | rS1O       | 44  | dsS1O      | 21 | sS1-C2     | 16 |
| 356.3                         | dC2CS      | 26 | rS1O'      | 26 |            |    | 358.1  | rS1O'      | 85  |            |    |            |    |
| 484.4                         | daS1O      | 65 | daS1O'     | 22 |            |    | 452.2  | dsS1O      | 57  | dC2CS      | 27 |            |    |
| 485.6                         | daS1O'     | 41 | dsS1O      | 23 | sS1-C2     | 16 | 615.6  | daS1O'     | 94  |            |    |            |    |
| 541.8                         | dsS1O      | 37 | daS1O'     | 17 |            |    | 616.4  | daS1O      | 92  |            |    |            |    |
| 707.4                         | sS1-C2     | 52 | dsS1O      | 29 |            |    | 680.5  | sS1-C2     | 62  | dsS1O      | 18 |            |    |
| 769.9                         | rC2H       | 51 | rC3H       | 25 |            |    | 822.4  | rC2H       | 74  |            |    |            |    |
| 960.2                         | sC2-C3     | 31 | rC3H'      | 22 | sS1-O      | 18 | 987.2  | sC2-C3     | 34  | rC3H'      | 28 |            |    |
|                               | wC2H       | 16 |            |    |            |    |        |            |     |            |    |            |    |
| 983.3                         | sS1-O      | 75 |            |    |            |    | 1017.2 | sS1-O      | 83  |            |    |            |    |
| 1018.6                        | iC2H       | 38 | rC2H       | 23 | rC3H       | 19 | 1036.8 | rC3H       | 52  | rC3H'      | 17 |            |    |
| 1054.6                        | sC2-C3     | 51 | rC3H'      | 25 |            |    | 1051.5 | sC2-C3     | 41  | rC3H'      | 35 |            |    |
| 1178.1                        | sS1-O      | 80 |            |    |            |    | 1192.0 | iC2H       | 46  | sS1-O      | 43 |            |    |
| 1182.0                        | sS1-O      | 91 |            |    |            |    | 1213.7 | sS1-O      | 90  |            |    |            |    |
| 1244.4                        | iC2H       | 56 | rC3H       | 20 |            |    | 1244.0 | iC2H       | 48  | sS1-O      | 47 |            |    |
| 1281.4                        | wC2H       | 73 |            |    |            |    | 1374.0 | wC2H       | 80  |            |    |            |    |
| 1366.9                        | dsC3H      | 95 |            |    |            |    | 1413.7 | dsC3H      | 78  |            |    |            |    |
| 1444.2                        | cC2H       | 97 |            |    |            |    | 1429.1 | daC3H'     | 56  | daC3H      | 19 | dsC3H      | 16 |
| 1463.4                        | daC3H      | 70 | daC3H'     | 23 |            |    | 1436.8 | daC3H      | 67  | daC3H'     | 22 |            |    |
| 1487.1                        | daC3H'     | 70 | daC3H      | 23 |            |    | 1458.6 | cC2H       | 91  |            |    |            |    |
| 2917.2                        | sC3-H      | 99 |            |    |            |    | 2852.6 | sC2-H      | 98  |            |    |            |    |
| 2943.1                        | sC2-H      | 98 |            |    |            |    | 2890.6 | sC2-H      | 99  |            |    |            |    |
| 2999.3                        | sC2-H      | 94 |            |    |            |    | 2902.7 | sC3-H      | 99  |            |    |            |    |
| 3002.8                        | sC3-H      | 99 |            |    |            |    | 2959.5 | sC3-H      | 100 |            |    |            |    |
| 3034.4                        | sC3-H      | 94 |            |    |            |    | 2960.5 | sC3-H      | 99  |            |    |            |    |

**Table S54.** MM and HF/6-31G(d) level interaction energies (kcal/mol) and distances (Å) of PSNA – water complexes.

| Interaction | Orientation | $\Delta E$ (QM) | $\Delta E$ (MM) | Difference | r (QM) | r (MM) | Difference |
|-------------|-------------|-----------------|-----------------|------------|--------|--------|------------|
| O11...HOH   | 180         | -11.67          | -11.64          | 0.03       | 1.90   | 1.73   | -0.17      |
| O12...HOH   | 180         | -11.72          | -11.75          | -0.03      | 1.90   | 1.73   | -0.17      |

**Table S55.** Gas phase dipole moment (Debye) of PSNA calculated at the MP2/6-31G(d) and MM level of theory.

| $\mu$ | QM      | MM      |
|-------|---------|---------|
| X     | 6.2863  | 6.6515  |
| Y     | -1.1324 | -1.0656 |
| Z     | 0.0000  | 0.0000  |
| Total | 6.3875  | 6.7363  |

**Table S56.** MM and MP2/6-31G(d) level equilibrium geometry of PSNA

| Coordinate      | QM     | MM      | Difference | Coordinate | QM    | MM    | Difference |
|-----------------|--------|---------|------------|------------|-------|-------|------------|
| Bond length (Å) |        |         |            | Angles (°) |       |       |            |
| S1-O11          | 1.488  | 1.449   | -0.040     | O11-S1-C2  | 103.9 | 103.5 | -0.4       |
| S1-O12          | 1.490  | 1.449   | -0.042     | O12-S1-C2  | 104.0 | 104.4 | 0.4        |
| S1-O13          | 1.490  | 1.449   | -0.042     | O13-S1-C2  | 104.0 | 104.4 | 0.4        |
| S1-C2           | 1.810  | 1.807   | -0.003     | O11-S1-O12 | 114.5 | 114.2 | -0.2       |
| C2-H21          | 1.096  | 1.107   | 0.011      | O11-S1-O13 | 114.5 | 114.2 | -0.2       |
| C2-H22          | 1.096  | 1.107   | 0.011      | O12-S1-O13 | 114.3 | 114.4 | 0.2        |
| C2-C3           | 1.520  | 1.544   | 0.024      | S1-C2-H21  | 106.9 | 107.0 | 0.1        |
| C3-H31          | 1.095  | 1.115   | 0.020      | S1-C2-H22  | 106.9 | 107.0 | 0.1        |
| C3-H32          | 1.095  | 1.115   | 0.020      | S1-C2-C3   | 112.3 | 112.3 | 0.0        |
| C3-C4           | 1.527  | 1.531   | 0.003      | C3-C2-H21  | 111.1 | 110.6 | -0.6       |
| C4-H41          | 1.096  | 1.110   | 0.014      | C3-C2-H22  | 111.1 | 110.6 | -0.6       |
| C4-H42          | 1.0957 | 1.11092 | 0.015      | H21-C2-H22 | 108.2 | 109.3 | 1.0        |
| C4-H43          | 1.0957 | 1.11092 | 0.015      | C2-C3-H31  | 108.1 | 108.9 | 0.8        |
|                 |        |         |            | C2-C3-H32  | 108.1 | 108.9 | 0.8        |
|                 |        |         |            | C2-C3-C4   | 112.8 | 112.9 | 0.1        |
|                 |        |         |            | H31-C3-H32 | 106.7 | 107.3 | 0.6        |
|                 |        |         |            | C4-C3-H31  | 110.4 | 109.4 | -1.1       |
|                 |        |         |            | C4-C3-H32  | 110.4 | 109.4 | -1.1       |
|                 |        |         |            | C3-C4-H41  | 111.6 | 110.5 | -1.1       |
|                 |        |         |            | C3-C4-H42  | 111.0 | 110.1 | -0.9       |
|                 |        |         |            | C3-C4-H43  | 111.0 | 110.1 | -0.9       |
|                 |        |         |            | H41-C4-H42 | 107.8 | 108.8 | 1.1        |
|                 |        |         |            | H41-C4-H43 | 107.8 | 108.8 | 1.1        |
|                 |        |         |            |            |       |       |            |
| Dihedrals (°)   |        |         |            |            |       |       |            |
| O12-S1-C2-C3    | 59.9   | 60.2    | 0.3        |            |       |       |            |
| S1-C2-C3-C4     | 180.0  | 180.0   | 0.0        |            |       |       |            |
| C2-C3-C4-H42    | 59.8   | 59.8    | 0.0        |            |       |       |            |

**Table S57.** Scaled MP2/6-31G(d) and MM level vibrational spectra of PSNA.

| QM (scaled by a factor 0.943) |            |     |            |    |            | MM |        |            |     |            |    |            |    |
|-------------------------------|------------|-----|------------|----|------------|----|--------|------------|-----|------------|----|------------|----|
| Freq                          | Assignment | %   | Assignment | %  | Assignment | %  | Freq   | Assignment | %   | Assignment | %  | Assignment | %  |
| 83.4                          | tC2-C3     | 75  | tS1-C2     | 15 |            |    | 94.1   | tC2-C3     | 76  |            |    |            |    |
| 96.5                          | tS1-C2     | 76  |            |    |            |    | 106.0  | tS1-C2     | 76  |            |    |            |    |
| 153.9                         | dC2CS      | 57  | rS1O       | 29 |            |    | 184.9  | dC2CS      | 59  | rS1O       | 27 |            |    |
| 247.0                         | tC3-C4     | 90  |            |    |            |    | 241.1  | tC3-C4     | 90  |            |    |            |    |
| 296.3                         | dC3CC      | 53  | sS1-C2     | 24 |            |    | 274.9  | dC3CC      | 35  | sS1-C2     | 26 | dsS1O      | 17 |
| 311.5                         | rS1O'      | 77  |            |    |            |    | 354.1  | rS1O'      | 90  |            |    |            |    |
| 333.8                         | rS1O       | 52  | daS1O      | 16 |            |    | 363.8  | rS1O       | 64  | dC3CC      | 20 |            |    |
| 483.9                         | daS1O'     | 88  |            |    |            |    | 471.8  | dsS1O      | 71  |            |    |            |    |
| 493.2                         | daS1O      | 75  |            |    |            |    | 615.7  | daS1O'     | 94  |            |    |            |    |
| 570.8                         | dsS1O      | 66  |            |    |            |    | 616.6  | daS1O      | 93  |            |    |            |    |
| 732.0                         | rC3H       | 49  | rC2H       | 19 |            |    | 724.3  | sS1-C2     | 63  |            |    |            |    |
| 752.7                         | sS1-C2     | 56  |            |    |            |    | 756.8  | rC3H       | 53  | rC2H       | 27 |            |    |
| 843.2                         | rC2H       | 40  | rC4H'      | 33 | iC3H       | 16 | 856.7  | rC2H       | 54  | rC3H       | 22 | rC4H'      | 17 |
| 886.8                         | rC4H       | 34  | sC2-C3     | 26 | sC3-C4     | 24 | 915.9  | rC4H       | 46  | sC2-C3     | 31 |            |    |
| 979.6                         | sS1-O      | 90  |            |    |            |    | 1014.5 | sS1-O      | 96  |            |    |            |    |
| 1031.2                        | sC3-C4     | 61  |            |    |            |    | 1028.1 | rC4H'      | 67  | rC3H       | 16 |            |    |
| 1033.6                        | iC2H       | 45  |            |    |            |    | 1033.8 | sC3-C4     | 70  |            |    |            |    |
| 1085.4                        | sC2-C3     | 43  | rC4H       | 24 | wC3H       | 15 | 1090.3 | sC2-C3     | 40  | rC4H       | 33 |            |    |
| 1180.4                        | sS1-O      | 82  |            |    |            |    | 1152.2 | iC2H       | 74  | sS1-O      | 18 |            |    |
| 1181.1                        | sS1-O      | 87  |            |    |            |    | 1211.7 | sS1-O      | 88  |            |    |            |    |
| 1215.4                        | rC4H'      | 30  | iC2H       | 26 | rC3H       | 25 | 1226.3 | iC3H       | 64  | sS1-O      | 28 |            |    |
| 1231.5                        | wC2H       | 60  | wC3H       | 15 |            |    | 1236.7 | sS1-O      | 45  | iC3H       | 27 | iC2H       | 19 |
| 1281.8                        | iC3H       | 62  | iC2H       | 24 |            |    | 1305.4 | wC2H       | 61  | wC3H       | 29 |            |    |
| 1336.4                        | wC3H       | 60  | wC2H       | 18 |            |    | 1361.3 | wC3H       | 46  | wC2H       | 18 |            |    |
| 1376.7                        | dsC4H      | 93  |            |    |            |    | 1401.3 | dsC4H      | 93  |            |    |            |    |
| 1440.7                        | cC2H       | 96  |            |    |            |    | 1425.1 | daC4H      | 70  | cC3H       | 19 |            |    |
| 1472.9                        | daC4H      | 53  | cC3H       | 43 |            |    | 1427.8 | daC4H'     | 92  |            |    |            |    |
| 1475.1                        | daC4H'     | 94  |            |    |            |    | 1440.8 | cC3H       | 66  | daC4H      | 22 |            |    |
| 1485.0                        | cC3H       | 56  | daC4H      | 41 |            |    | 1447.8 | cC2H       | 94  |            |    |            |    |
| 2907.7                        | sC4-H      | 100 |            |    |            |    | 2852.6 | sC2-H      | 98  |            |    |            |    |
| 2929.9                        | sC2-H      | 96  |            |    |            |    | 2889.7 | sC2-H      | 98  |            |    |            |    |
| 2945.2                        | sC3-H      | 94  |            |    |            |    | 2897.2 | sC4-H      | 66  | sC3-H      | 33 |            |    |
| 2979.9                        | sC3-H      | 38  | sC4-H      | 35 | sC2-H      | 27 | 2907.4 | sC3-H      | 65  | sC4-H      | 34 |            |    |
| 2985.1                        | sC4-H      | 98  |            |    |            |    | 2932.0 | sC3-H      | 94  |            |    |            |    |
| 2988.2                        | sC2-H      | 57  | sC4-H      | 43 |            |    | 2959.5 | sC4-H      | 100 |            |    |            |    |
| 3007.4                        | sC3-H      | 62  | sC4-H      | 21 | sC2-H      | 17 | 2959.7 | sC4-H      | 96  |            |    |            |    |

**Table S58.** MM and HF/6-31G(d) level interaction energies (kcal/mol) and distances (Å) of MSMT – water complexes.

| Interaction | Orientation | $\Delta E$ (QM) | $\Delta E$ (MM) | Difference | r (QM) | r (MM) | Difference |
|-------------|-------------|-----------------|-----------------|------------|--------|--------|------------|
| O11...HOH   | 180         | -3.99           | -4.09           | -0.10      | 2.17   | 1.91   | -0.26      |
| O11...HOH   | 270         | -3.95           | -3.97           | -0.03      | 2.16   | 1.88   | -0.28      |
| O3...HOH    | 0           | -2.25           | -1.98           | 0.26       | 2.12   | 1.86   | -0.26      |
| O3...HOH    | 90          | -3.08           | -3.18           | -0.11      | 2.09   | 1.80   | -0.29      |
| N2...HOH    | 180         | -1.25           | -0.04           | 1.21       | 2.45   | 2.50   | 0.05       |
| N2H..OHH    | 90          | -7.26           | -7.19           | 0.07       | 2.00   | 1.82   | -0.18      |

**Table S59.** Gas phase dipole moment (Debye) of MSMT calculated at the MP2/6-31G(d) and MM level of theory.

| $\mu$ | QM      | MM      |
|-------|---------|---------|
| X     | -1.6294 | -1.9325 |
| Y     | -0.8514 | -1.0213 |
| Z     | -3.4157 | -4.0984 |
| Total | 3.8790  | 4.6448  |

**Table S60.** MM and MP2/6-31G(d) level equilibrium geometry of MSMT

| Coordinate      | QM    | MM    | Difference | Coordinate | QM    | MM    | Difference |
|-----------------|-------|-------|------------|------------|-------|-------|------------|
| Bond length (Å) |       |       |            | Angles (°) |       |       |            |
| S1-N2           | 1.647 | 1.642 | -0.004     | N2-S1-O3   | 99.7  | 99.9  | 0.2        |
| S1-O11          | 1.453 | 1.435 | -0.018     | O11-S1-N2  | 108.1 | 108.9 | 0.8        |
| S1-O12          | 1.453 | 1.435 | -0.018     | O12-S1-N2  | 108.1 | 108.9 | 0.8        |
| S1-O3           | 1.642 | 1.594 | -0.047     | O11-S1-O3  | 108.2 | 108.1 | -0.1       |
| N2-H21          | 1.017 | 1.014 | -0.003     | O12-S1-O3  | 108.2 | 108.1 | -0.1       |
| N2-H22          | 1.017 | 1.014 | -0.003     | O11-S1-O12 | 122.2 | 121.0 | -1.2       |
| O3-C4           | 1.452 | 1.436 | -0.016     | S1-N2-H21  | 112.2 | 111.3 | -0.8       |
| C4-H41          | 1.088 | 1.110 | 0.022      | S1-N2-H22  | 112.2 | 111.3 | -0.8       |
| C4-H42          | 1.092 | 1.112 | 0.021      | H21-N2-H22 | 112.7 | 110.2 | -2.5       |
| C4-H43          | 1.092 | 1.112 | 0.021      | S1-O3-C4   | 113.2 | 114.0 | 0.8        |
|                 |       |       |            | O3-C4-H41  | 104.8 | 109.7 | 4.8        |
|                 |       |       |            | O3-C4-H42  | 110.0 | 110.6 | 0.6        |

| Dihedrals (°) |       |       |     | O3-C4-H43  | 110.0 | 110.6 | 0.6  |
|---------------|-------|-------|-----|------------|-------|-------|------|
| O3-S1-N2-H21  | -64.0 | -61.7 | 2.3 | H41-C4-H42 | 110.6 | 108.5 | -2.1 |
| O11-S1-O3-C4  | -67.2 | -66.3 | 0.9 | H41-C4-H43 | 110.6 | 108.5 | -2.1 |
| S1-O3-C4-H42  | -61.1 | -60.4 | 0.8 | H42-C4-H43 | 110.8 | 108.9 | -1.9 |

**Table S61.** Scaled MP2/6-31G(d) and MM level vibrational spectra of MSMT.

| QM (scaled by a factor 0.943) |            |     |            |    |            | MM     |            |     |            |    |            |    |
|-------------------------------|------------|-----|------------|----|------------|--------|------------|-----|------------|----|------------|----|
| Freq                          | Assignment | %   | Assignment | %  | Assignment | Freq   | Assignment | %   | Assignment | %  | Assignment | %  |
| 51.1                          | tS1-O3     | 89  |            |    |            | 80.2   | tS1-O3     | 78  | tO3-C4     | 21 |            |    |
| 148.7                         | tO3-C4     | 91  |            |    |            | 154.1  | tO3-C4     | 78  | tS1-O3     | 21 |            |    |
| 215.2                         | iO3        | 49  | dS1ON      | 42 |            | 240.8  | iO3        | 53  | dS1ON      | 32 |            |    |
| 253.1                         | tS1-N2     | 64  | iSO2       | 27 |            | 279.5  | tS1-N2     | 88  |            |    |            |    |
| 339.8                         | dS1ON      | 38  | iO3        | 29 |            | 334.1  | dS1ON      | 53  | wSO2       | 19 |            |    |
| 389.9                         | iSO2       | 65  | tS1-N2     | 34 |            | 391.1  | iSO2       | 78  |            |    |            |    |
| 453.8                         | rSO2       | 87  |            |    |            | 430.6  | wSO2       | 39  | cSO2       | 24 | sS1-N2     | 19 |
| 475.0                         | cSO2       | 80  |            |    |            | 450.8  | rSO2       | 77  |            |    |            |    |
| 533.3                         | wSO2       | 59  | iO3        | 17 |            | 464.1  | cSO2       | 64  | wSO2       | 16 |            |    |
| 641.3                         | wN2S1      | 49  | sS1-O      | 31 |            | 698.8  | sS1-O      | 59  |            |    |            |    |
| 738.3                         | sS1-O      | 49  | wN2S1      | 25 |            | 724.7  | sS1-N2     | 44  | wN2S1      | 18 | sS1-O      | 18 |
| 860.9                         | sS1-N2     | 66  |            |    |            | 918.7  | wN2S1      | 77  | sS1-N2     | 16 |            |    |
| 986.7                         | sO3-C4     | 92  |            |    |            | 1028.8 | sO3-C4     | 77  |            |    |            |    |
| 1081.4                        | dN2S1      | 87  |            |    |            | 1064.7 | dN2S1      | 92  |            |    |            |    |
| 1133.5                        | rC4H'      | 94  |            |    |            | 1115.8 | sS1-O      | 69  | rC4H       | 20 |            |    |
| 1139.8                        | sS1-O      | 66  | rC4H       | 24 |            | 1129.3 | rC4H'      | 76  | daC4H'     | 24 |            |    |
| 1154.2                        | rC4H       | 67  | sS1-O      | 22 |            | 1150.7 | rC4H       | 57  | sS1-O      | 24 |            |    |
| 1353.5                        | sS1-O      | 88  |            |    |            | 1318.8 | sS1-O      | 89  |            |    |            |    |
| 1424.6                        | dsC4H      | 100 |            |    |            | 1432.5 | daC4H      | 82  | rC4H       | 18 |            |    |
| 1462.3                        | daC4H'     | 94  |            |    |            | 1460.8 | daC4H'     | 76  | rC4H'      | 24 |            |    |
| 1479.1                        | daC4H      | 94  |            |    |            | 1569.2 | dN2H21     | 97  |            |    |            |    |
| 1562.0                        | dN2H21     | 98  |            |    |            | 1596.5 | dsC4H      | 88  |            |    |            |    |
| 2949.0                        | sC4-H      | 100 |            |    |            | 2851.5 | sC4-H      | 100 |            |    |            |    |
| 3045.1                        | sC4-H      | 100 |            |    |            | 2913.1 | sC4-H      | 100 |            |    |            |    |
| 3074.2                        | sC4-H      | 100 |            |    |            | 2915.6 | sC4-H      | 100 |            |    |            |    |
| 3351.3                        | sN2-H      | 100 |            |    |            | 3339.8 | sN2-H      | 100 |            |    |            |    |
| 3467.5                        | sN2-H      | 100 |            |    |            | 3415.5 | sN2-H      | 100 |            |    |            |    |

**Table S62.** MM and HF/6-31G(d) level interaction energies (kcal/mol) and distances (Å) of PSMT – water complexes.

| Interaction | Orientation | $\Delta E$ (QM) | $\Delta E$ (MM) | Difference | r (QM) | r (MM) | Difference |
|-------------|-------------|-----------------|-----------------|------------|--------|--------|------------|
|-------------|-------------|-----------------|-----------------|------------|--------|--------|------------|

|           |     |       |       |       |      |      |       |
|-----------|-----|-------|-------|-------|------|------|-------|
| O11...HOH | 180 | -3.85 | -4.14 | -0.29 | 2.18 | 1.91 | -0.27 |
| O11...HOH | 90  | -4.57 | -4.87 | -0.30 | 2.14 | 1.86 | -0.28 |
| O3...HOH  | 180 | -2.42 | -2.10 | 0.32  | 2.14 | 1.89 | -0.25 |
| O3...HOH  | 90  | -2.86 | -2.87 | -0.01 | 2.12 | 1.82 | -0.30 |
| N2...HOH  | 180 | -1.13 | 0.02  | 1.15  | 2.45 | 2.52 | 0.07  |
| N2H..OHH  | 90  | -7.42 | -7.33 | 0.09  | 2.00 | 1.82 | -0.18 |

**Table S63.** Gas phase dipole moment (Debye) of PSMT calculated at the MP2/6-31G(d) and MM level of theory.

| $\mu$ | QM      | MM      |
|-------|---------|---------|
| X     | -1.4223 | -1.7721 |
| Y     | 3.2020  | 4.3189  |
| Z     | 0.0000  | 0.0000  |
| Total | 3.5037  | 4.6683  |

**Table S64.** MM and MP2/6-31G(d) level equilibrium geometry of PSMT

| Coordinate      | QM    | MM    | Difference | Coordinate | QM    | MM    | Difference |
|-----------------|-------|-------|------------|------------|-------|-------|------------|
| Bond length (Å) |       |       |            | Angles (°) |       |       |            |
| S1-N2           | 1.647 | 1.643 | -0.005     | N2-S1-O3   | 99.1  | 99.5  | 0.4        |
| S1-O11          | 1.452 | 1.436 | -0.015     | O11-S1-N2  | 108.2 | 108.2 | 0.1        |
| S1-O12          | 1.452 | 1.436 | -0.015     | O12-S1-N2  | 108.2 | 108.2 | 0.1        |
| S1-O3           | 1.665 | 1.601 | -0.064     | O11-S1-O3  | 108.0 | 108.8 | 0.8        |
| O3-CZ           | 1.413 | 1.389 | -0.023     | O12-S1-O3  | 108.0 | 108.8 | 0.8        |
| N2-H21          | 1.018 | 1.014 | -0.003     | O11-S1-O12 | 122.9 | 121.1 | -1.8       |
| N2-H22          | 1.018 | 1.014 | -0.003     | S1-O3-CZ   | 113.8 | 113.7 | 0.0        |
| CZ-CE1          | 1.392 | 1.404 | 0.012      | S1-N2-H21  | 112.1 | 111.5 | -0.6       |
| CZ-CE2          | 1.392 | 1.404 | 0.012      | S1-N2-H22  | 112.1 | 111.5 | -0.6       |
| CE1-CD1         | 1.396 | 1.402 | 0.006      | H21-N2-H22 | 112.7 | 110.3 | -2.3       |
| CE2-CD2         | 1.396 | 1.402 | 0.006      | O3-CZ-CE1  | 118.8 | 120.2 | 1.4        |
| CG-CD1          | 1.397 | 1.402 | 0.004      | O3-CZ-CE2  | 118.8 | 120.2 | 1.4        |
| CG-CD2          | 1.397 | 1.402 | 0.004      | CE1-CZ-CE2 | 122.4 | 119.4 | -3.0       |
| CE1-HE1         | 1.086 | 1.079 | -0.006     | CZ-CE1-CD1 | 118.4 | 120.4 | 2.0        |
| CE2-HE2         | 1.086 | 1.079 | -0.006     | CZ-CE2-CD2 | 118.4 | 120.4 | 2.0        |
| CD1-HD1         | 1.087 | 1.081 | -0.006     | CG-CD1-CE1 | 120.3 | 119.8 | -0.5       |



|                |        |        |        |             |       |       |      |
|----------------|--------|--------|--------|-------------|-------|-------|------|
| CD2-HD2        | 1.087  | 1.081  | -0.006 | CG-CD2-CE2  | 120.3 | 119.8 | -0.5 |
| CG-HG          | 1.087  | 1.081  | -0.006 | CD1-CG-CD2  | 120.1 | 120.2 | 0.1  |
| Dihedrals (°)  |        |        |        | CZ-CE1-HE1  | 119.7 | 119.1 | -0.6 |
| N2-S1-O3-CZ    | 180.0  | 180.0  | 0.0    | CZ-CE2-HE2  | 119.7 | 119.1 | -0.6 |
| O3-S1-N2-H21   | -63.9  | -61.9  | 2.0    | CD1-CE1-HE1 | 121.9 | 120.5 | -1.4 |
| S1-O3-CZ-CE1   | 91.4   | 92.3   | 0.9    | CD2-CE2-HE2 | 121.9 | 120.5 | -1.4 |
| O3-CZ-CE1-CD1  | 176.9  | 177.0  | 0.1    | CE1-CD1-HD1 | 119.5 | 120.1 | 0.6  |
| CZ-CE1-CD1-CG  | 0.1    | -0.8   | -0.9   | CE2-CD2-HD2 | 119.5 | 120.1 | 0.6  |
| CE1-CD1-CG-CD2 | 0.1    | 0.0    | -0.1   | CG-CD1-HD1  | 120.1 | 120.1 | 0.0  |
| O3-CZ-CE2-CD2  | -176.9 | -177.0 | -0.1   | CG-CD2-HD2  | 120.1 | 120.1 | 0.0  |
| CZ-CE2-CD2-CG  | -0.1   | 0.8    | 0.9    | CD1-CG-HG   | 120.0 | 119.9 | 0.0  |
| CE2-CD2-CG-CD1 | -0.1   | 0.0    | 0.1    | CD2-CG-HG   | 120.0 | 119.9 | 0.0  |

**Table S65.** Scaled MP2/6-31G(d) and MM level vibrational spectra of PSMT.

| QM (scaled by a factor 0.943) |            |    |            |    |            | MM |       |            |     |            |    |            |    |
|-------------------------------|------------|----|------------|----|------------|----|-------|------------|-----|------------|----|------------|----|
| Freq                          | Assignment | %  | Assignment | %  | Assignment | %  | Freq  | Assignment | %   | Assignment | %  | Assignment | %  |
| 13.8                          | tO3-CZ     | 62 | tS1-O3     | 37 |            |    | 21.7  | tO3-CZ     | 70  | tS1-O3     | 28 |            |    |
| 57.6                          | tS1-O3     | 60 | tO3-CZ     | 40 |            |    | 69.8  | tS1-O3     | 69  | tO3-CZ     | 32 |            |    |
| 84.2                          | iO3        | 47 | wCZH       | 41 |            |    | 91.9  | wCZH       | 54  | iO3        | 36 |            |    |
| 220.3                         | ta6RNG1a   | 36 | dSON       | 19 | iO3        | 15 | 240.7 | iO3        | 36  | ta6RNG1a   | 23 |            |    |
| 230.5                         | iSO2       | 43 | tS1-N2     | 41 |            |    | 260.4 | dSON       | 70  |            |    |            |    |
| 254.3                         | dSON       | 53 |            |    |            |    | 275.4 | tS1-N2     | 85  |            |    |            |    |
| 317.3                         | tS1-N2     | 35 | dCZH       | 35 | rSO2       | 19 | 331.6 | dCZH       | 36  | iSO2       | 29 | rSO2       | 16 |
| 381.7                         | ta6RNG1    | 87 | ta6RNG1a   | 29 |            |    | 399.3 | rSO2       | 42  | iSO2       | 40 |            |    |
| 405.7                         | iSO2       | 45 | tS1-N2     | 23 | rSO2       | 16 | 408.6 | wSO2       | 69  |            |    |            |    |
| 423.6                         | ta6RNG1a   | 29 | cSO2       | 22 |            |    | 415.1 | ta6RNG1    | 88  | ta6RNG1a   | 29 |            |    |
| 455.1                         | tp6RNG1    | 57 | cSO2       | 26 |            |    | 447.5 | cSO2       | 39  | ta6RNG1a   | 34 |            |    |
| 474.4                         | tp6RNG1    | 38 | wSO2       | 31 |            |    | 484.0 | cSO2       | 38  | ta6RNG1a   | 17 |            |    |
| 474.6                         | rSO2       | 56 | dCZH       | 23 |            |    | 527.0 | dCZH       | 34  | rSO2       | 34 | iSO2       | 21 |
| 507.2                         | cSO2       | 33 | wSO2       | 20 | da6RNG1a   | 15 | 574.3 | da6RNG1a   | 26  |            |    |            |    |
| 588.0                         | iO3        | 21 | da6RNG1a   | 18 | wSO2       | 16 | 646.8 | tp6RNG1    | 104 |            |    |            |    |
| 593.4                         | da6RNG1    | 61 | da6RNG1a   | 20 |            |    | 678.0 | da6RNG1    | 62  | da6RNG1a   | 21 |            |    |
| 642.1                         | wN2S1      | 34 | sS1-O      | 27 |            |    | 708.5 | sS1-N2     | 41  | sS1-O      | 27 |            |    |
| 695.8                         | wN2S1      | 23 | wCGH       | 17 |            |    | 738.0 | sS1-O      | 21  |            |    |            |    |
| 731.5                         | sS1-O      | 30 |            |    |            |    | 763.5 | wCGH       | 23  |            |    |            |    |
| 763.2                         | wCE2H      | 41 | wCE1H      | 41 |            |    | 811.7 | sS1-O      | 19  | dt6RNG1    | 18 |            |    |
| 802.5                         | sCZ-O3     | 17 |            |    |            |    | 854.1 | wCE2H      | 25  | wCE1H      | 25 | wCD1H      | 25 |
|                               |            |    |            |    |            |    |       | wCD2H      | 25  |            |    |            |    |
| 813.2                         | wCE1H      | 21 | wCE2H      | 21 |            |    | 913.5 | wN2S1      | 70  | sS1-N2     | 16 |            |    |
| 841.0                         | wCD2H      | 44 | wCD1H      | 44 |            |    | 925.3 | wCE1H      | 38  | wCE2H      | 38 | wCGH       | 26 |

|        |          |     |          |    |          |    |        |          |     |          |    |          |    |
|--------|----------|-----|----------|----|----------|----|--------|----------|-----|----------|----|----------|----|
| 844.1  | wCGH     | 53  | wCD1H    | 27 | wCD2H    | 27 | 951.3  | dt6RNG1  | 47  |          |    |          |    |
| 860.1  | sS1-N2   | 58  | wN2S1    | 17 |          |    | 978.8  | sCD1-CG  | 30  | sCG-CD2  | 30 |          |    |
| 968.6  | dt6RNG1  | 66  |          |    |          |    | 995.7  | wCD1H    | 30  | wCD2H    | 30 | wCE2H    | 29 |
|        |          |     |          |    |          |    |        | wCE1H    | 29  |          |    |          |    |
| 1001.5 | sCG-CD2  | 26  | sCD1-CG  | 26 |          |    | 1006.6 | wCGH     | 51  | wCD1H    | 31 | wCD2H    | 31 |
|        |          |     |          |    |          |    |        | tp6RNG1  | -18 |          |    |          |    |
| 1054.8 | sCD2-CE2 | 19  | sCE1-CD1 | 19 |          |    | 1031.0 | sCE1-CD1 | 23  | sCD2-CE2 | 23 |          |    |
| 1081.7 | dN2S1    | 88  |          |    |          |    | 1066.3 | dN2S1    | 92  |          |    |          |    |
| 1129.8 | sS1-O    | 32  | sCZ-O3   | 22 |          |    | 1124.3 | sS1-O    | 90  |          |    |          |    |
| 1146.1 | dCGH     | 42  | dCD2H    | 19 | dCD1H    | 19 | 1157.1 | sCD2-CE2 | 21  | sCE1-CD1 | 21 |          |    |
| 1147.1 | sS1-O    | 36  |          |    |          |    | 1215.0 | dCGH     | 25  | dCD1H    | 19 | dCD2H    | 19 |
| 1170.5 | sCZ-O3   | 27  | sS1-O    | 20 |          |    | 1268.1 | sCZ-O3   | 37  | dCE1H    | 19 | dCE2H    | 19 |
| 1275.3 | dCE2H    | 26  | dCE1H    | 26 |          |    | 1319.4 | sS1-O    | 88  |          |    |          |    |
| 1360.8 | sS1-O    | 89  |          |    |          |    | 1359.4 | dCE1H    | 29  | dCE2H    | 29 |          |    |
| 1387.9 | sCE2-CZ  | 17  | sCZ-CE1  | 17 | sCD1-CG  | 16 | 1427.4 | dCGH     | 25  | sCZ-CE1  | 20 | sCE2-CZ  | 20 |
|        | sCG-CD2  | 16  |          |    |          |    |        |          |     |          |    |          |    |
| 1424.6 | dCGH     | 30  |          |    |          |    | 1437.9 | dCD2H    | 20  | dCD1H    | 20 | sCD2-CE2 | 17 |
|        |          |     |          |    |          |    |        | sCE1-CD1 | 17  |          |    |          |    |
| 1457.2 | dCD2H    | 16  | dCD1H    | 16 |          |    | 1467.4 | dCD2H    | 30  | dCD1H    | 30 |          |    |
| 1561.2 | dN2H     | 97  |          |    |          |    | 1486.4 | dCGH     | 23  |          |    |          |    |
| 1570.1 | sCE1-CD1 | 23  | sCD2-CE2 | 23 |          |    | 1542.3 | dCE1H    | 16  | dCE2H    | 16 |          |    |
| 1576.2 | sCE2-CZ  | 20  | sCZ-CE1  | 20 | sCD1-CG  | 18 | 1571.8 | dN2H     | 97  |          |    |          |    |
|        | sCG-CD2  | 18  |          |    |          |    |        |          |     |          |    |          |    |
| 3046.2 | sCG-HG   | 43  | sCD1-HD1 | 27 | sCD2-HD2 | 27 | 3054.7 | sCD2-HD2 | 27  | sCD1-HD1 | 27 | sCE1-HE1 | 23 |
|        |          |     |          |    |          |    |        | sCE2-HE2 | 23  |          |    |          |    |
| 3055.6 | sCD2-HD2 | 46  | sCD1-HD1 | 46 |          |    | 3055.2 | sCG-HG   | 70  |          |    |          |    |
| 3065.4 | sCG-HG   | 54  | sCD2-HD2 | 16 | sCD1-HD1 | 16 | 3056.8 | sCE2-HE2 | 27  | sCE1-HE1 | 27 | sCD1-HD1 | 23 |
|        |          |     |          |    |          |    |        | sCD2-HD2 | 23  |          |    |          |    |
| 3077.6 | sCE1-HE1 | 46  | sCE2-HE2 | 46 |          |    | 3057.1 | sCD2-HD2 | 33  | sCD1-HD1 | 33 | sCG-HG   | 16 |
| 3078.3 | sCE2-HE2 | 41  | sCE1-HE1 | 41 |          |    | 3060.3 | sCE1-HE1 | 27  | sCE2-HE2 | 27 | sCD1-HD1 | 16 |
|        |          |     |          |    |          |    |        | sCD2-HD2 | 16  |          |    |          |    |
| 3348.8 | sN2-H    | 100 |          |    |          |    | 3339.4 | sN2-H    | 100 |          |    |          |    |
| 3465.0 | sN2-H    | 100 |          |    |          |    | 3415.6 | sN2-H    | 100 |          |    |          |    |

**Table S66.** Parameters introduced to enable sulfonamide based peptide simulation.

| Bond Parameter   |     |       | Force constant | Equilibrium value |
|------------------|-----|-------|----------------|-------------------|
| CG301            | NH1 |       | 320.0          | 1.430             |
| Angle Parameters |     |       | Force constant | Equilibrium value |
| C                | NH1 | CG301 | 50.0           | 120.0             |
| CG301            | NH1 | H     | 35.0           | 117.0             |

|       |       |       |      |       |
|-------|-------|-------|------|-------|
| CG301 | CG321 | NG311 | 43.7 | 112.2 |
| CG321 | CG301 | NH1   | 70.0 | 113.5 |
| CG331 | CG301 | NH1   | 70.0 | 113.5 |

| Dihedral Parameters |       |       |       | Force constant | Fold | Phase angle |
|---------------------|-------|-------|-------|----------------|------|-------------|
| CPD1                | C     | NH1   | CG301 | 1.60           | 1    | 0.0         |
| CPD1                | C     | NH1   | CG301 | 2.50           | 2    | 180.0       |
| O                   | C     | NH1   | CG301 | 2.50           | 2    | 180.0       |
| NH1                 | CG301 | CG321 | HGA2  | 0.20           | 3    | 0.0         |
| NH1                 | CG301 | CG321 | HGA3  | 0.20           | 3    | 0.0         |
| CG321               | CG301 | NH1   | C     | 1.80           | 1    | 0.0         |
| CG321               | CG301 | NH1   | H     | 0.00           | 1    | 0.0         |
| CG331               | CG301 | NH1   | C     | 1.80           | 1    | 0.0         |
| CG331               | CG301 | NH1   | H     | 0.00           | 1    | 0.0         |
| CG301               | CG321 | NG311 | SG3O2 | 0.10           | 1    | 0.0         |
| CG301               | CG321 | NG311 | SG3O2 | 0.70           | 2    | 0.0         |
| CG301               | CG321 | NG311 | SG3O2 | 0.10           | 3    | 0.0         |
| CG301               | CG321 | NG311 | HGP1  | 0.10           | 3    | 0.0         |
| CG321               | NG311 | SG3O2 | CG331 | 2.00           | 2    | 0.0         |
| CG321               | NG311 | SG3O2 | CG331 | 0.30           | 3    | 0.0         |
| CG331               | CG301 | CG321 | NG311 | 0.195          | 3    | 0.0         |
| NH1                 | CG301 | CG321 | NG311 | 0.195          | 3    | 0.0         |

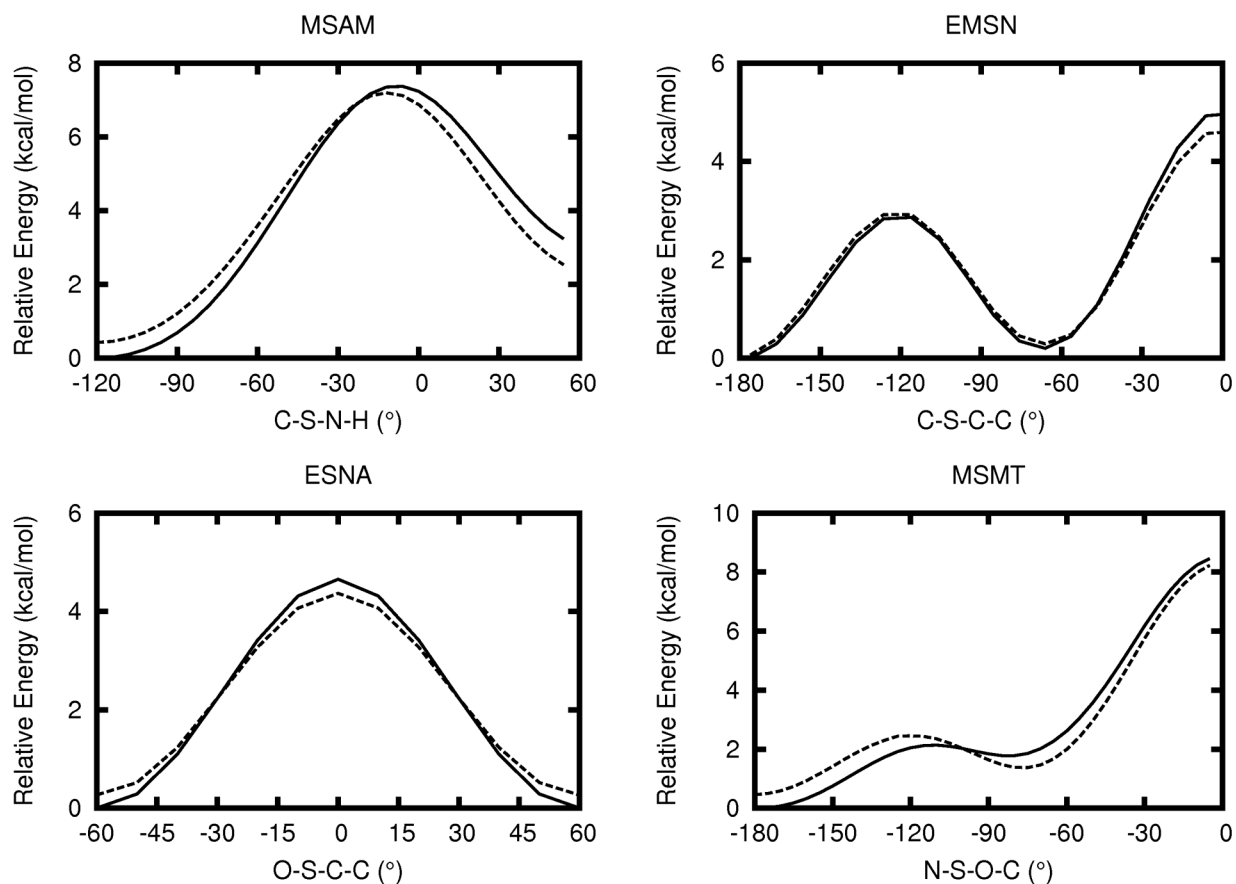

**Figure S1.** MP2/cc-pVTZ//MP2/6-31G(d) level PESs (dashed line) along with MP2/6-31G(d) level PESs (solid line) for the four model compounds containing the four sulfonyl moieties to test the basis set dependence.

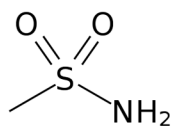

MSULPH01

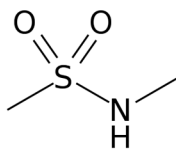

MIYFEF

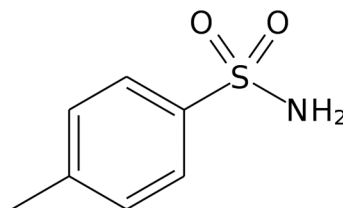

KUSVEZ02

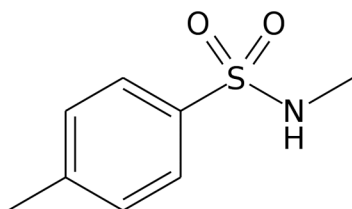

GESSOM

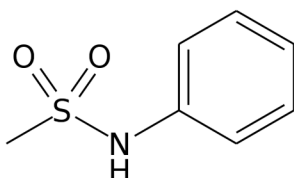

MSULFN

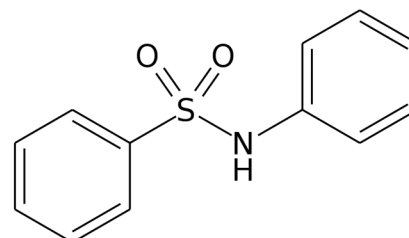

TEWCAA

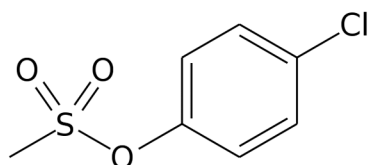

YIQBIK

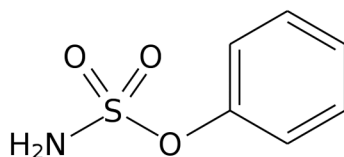

JEFNIS

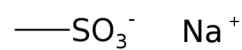

BAKLAA

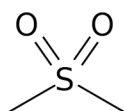

DMSULO04

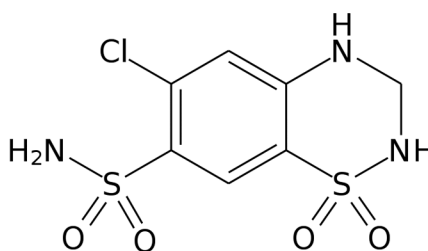

HCSBTZ04

**Figure S2.** Chemical structures of the compounds that were taken from the CSD and were used in the crystalline phase validations.
